# Supplementary material for: TBX1 Mutation Identified by Exome Sequencing in a Japanese Family with 22q11.2 Deletion Syndrome-Like Craniofacial Features and Hypocalcemia
Source: PubMed Central journal article supplement (PMC3956758; doi:10.1371/journal.pone.0091598), 2014-03-17
Supplement: pone.0091598.s003.pdf [file pone.0091598.s003.pdf]

**Table S1.** Summary of heterozygous non-synonymous variants.

| Gene                                                                                            | Location | Disease association                                                                                  | cDNA change  | RefSeq ID    | Amino acid change           | Predicted function |           |             |
|-------------------------------------------------------------------------------------------------|----------|------------------------------------------------------------------------------------------------------|--------------|--------------|-----------------------------|--------------------|-----------|-------------|
|                                                                                                 |          |                                                                                                      |              |              |                             | Polyphen-2         | SIFT      | PROVEAN     |
| Non-synonymous variants that are present in groups 1+2 and absent from group 3 and control data |          |                                                                                                      |              |              |                             |                    |           |             |
| <i>HDAC4</i>                                                                                    | 2q37.3   | Brachydactyly-mental retardation syndrome <sup>a</sup>                                               | c.610G>A     | NM_006037    | p.G204R                     | Benign             | Tolerated | Neutral     |
| <i>AGBL2</i>                                                                                    | 11p11.2  |                                                                                                      | c.2135A>C    | NM_02478     | p.D712A                     | Damaging           | Tolerated | Deleterious |
| <i>SLC15A3</i>                                                                                  | 11q12.2  |                                                                                                      | c.269G>T     | NM_016582    | p.G90V                      | Benign             | Damaging  | Deleterious |
| <i>MRGPRF</i>                                                                                   | 11q13.1  |                                                                                                      | c.509T>C     | NM_001098515 | p.L170P                     | Damaging           | Damaging  | Deleterious |
| <i>CCND1</i>                                                                                    | 11q13    | Colorectal cancer (susceptibility) <sup>b</sup><br>von Hippel-Lindau disease (modifier) <sup>b</sup> | c.826_828del | NM_053056    | p.E276del <sup>c</sup>      | N.A.               | N.A.      | Neutral     |
| <i>CTTN</i>                                                                                     | 11q13    |                                                                                                      | c.1030T>C    | NM_001184740 | p.R344W                     | Damaging           | Damaging  | Deleterious |
| <i>TIAMI</i>                                                                                    | 21q22.1  |                                                                                                      | c.3059C>A    | NM_003253    | p.S1020Y                    | Benign             | Damaging  | Deleterious |
| <i>CLIC6</i>                                                                                    | 21q22.12 |                                                                                                      | c.776_805del | NM_053277    | p.V259_S268del <sup>d</sup> | N.A.               | N.A.      | Neutral     |
| <i>TBX1</i>                                                                                     | 22q11.21 | DiGeorge syndrome<br>Velocardiofacial syndrome                                                       | c.1253delA   | NM_080647    | p.Y418fsX459                | N.A.               | N.A.      | N.A.        |
| Non-synonymous variants that are present in group 1 and absent from groups 2+3 and control data |          |                                                                                                      |              |              |                             |                    |           |             |
| <i>EP400</i>                                                                                    | 12q24.33 |                                                                                                      | c.2494C>G    | NM_015409    | p.R832G                     | Damaging           | Damaging  | Deleterious |
| <i>CEP76</i>                                                                                    | 18p11.21 |                                                                                                      | c.1327G>T    | NM_024899    | p.V443F                     | Benign             | Tolerated | Neutral     |

N.A.: not applicable.

<sup>a</sup> Caused by heterozygous loss-of-function mutations of *HDAC4*.

<sup>b</sup> Constituted by overexpression of *CCND4*.

<sup>c</sup> This deletion shortens the glutamic acid stretch from nine to eight.

<sup>d</sup> In-frame deletion of 10 amino acids (VEAGVPAGDS).
