# Supplementary material for: TBX1 Mutation Identified by Exome Sequencing in a Japanese Family with 22q11.2 Deletion Syndrome-Like Craniofacial Features and Hypocalcemia
Source: PubMed Central journal article supplement (PMC3956758; doi:10.1371/journal.pone.0091598), 2014-03-17
Supplement: pone.0091598.s004.pdf [file pone.0091598.s004.pdf]

Supplemental Table 2. A list of variants that are present in groups 1+2 and absent from group 3

| Gene                      | Location | Type                   | Substitution                        | dbSNP       | II-2   | III-1  | III-5  | III-6  | III-7  |
|---------------------------|----------|------------------------|-------------------------------------|-------------|--------|--------|--------|--------|--------|
| <Non-synonymous variants> |          |                        |                                     |             |        |        |        |        |        |
| ZYG11A                    | 1p32.3   | nonsynonymous SNV      | NM_001004339:c.G228T;p.E76D         | rs480299    | Hetero | Homo   | Hetero | Homo   | Homo   |
| HFM1                      | 1p22.2   | nonsynonymous SNV      | NM_001017975:c.G3470A;p.C1157Y      | rs74938180  | Hetero | Hetero | Hetero | Hetero | Hetero |
| C2orf72                   | 2q37.1   | nonsynonymous SNV      | NM_001144994:c.C191G;p.A64G         | rs190787545 | Homo   | Hetero | Hetero | Hetero | Hetero |
| HDAC4                     | 2q37.3   | nonsynonymous SNV      | NM_006037:c.G610A;p.G204R           | .           | Hetero | Hetero | Hetero | Hetero | Hetero |
| PDCD1                     | 2q37.3   | nonsynonymous SNV      | NM_005018:c.C644T;p.A215V           | rs2227982   | Hetero | Hetero | Hetero | Hetero | Hetero |
| CXXC11                    | 2q37.3   | nonsynonymous SNV      | NM_173821:c.T932C;p.L311P           | rs75447317  | Hetero | Hetero | Hetero | Hetero | Hetero |
| CXXC11                    | 2q37.3   | nonsynonymous SNV      | NM_173821:c.C1352T;p.A451V          | rs28368764  | Hetero | Hetero | Hetero | Hetero | Hetero |
| THUMP3                    | 3p25.3   | nonsynonymous SNV      | NM_001114092:c.G1376A;p.R459Q       | rs1129174   | Hetero | Hetero | Hetero | Hetero | Hetero |
| TAMM41                    | 3p25.2   | nonsynonymous SNV      | NM_138807:c.A347G;p.N116S           | rs7641243   | Hetero | Hetero | Hetero | Hetero | Hetero |
| PI4K2B                    | 4p15.2   | nonsynonymous SNV      | NM_018323:c.T232C;p.S78P            | rs313549    | Homo   | Homo   | Homo   | Homo   | Homo   |
| HLA-B                     | 6p21.33  | stopgain SNV           | NM_005514:c.C420A;p.Y140X           | rs12697944  | Hetero | Hetero | Hetero | Hetero | Hetero |
| VWDE                      | 7p21.3   | nonsynonymous SNV      | NM_001135924:c.T4454G;p.F1485C      | rs2192828   | Hetero | Hetero | Hetero | Hetero | Hetero |
| VWDE                      | 7p21.3   | nonsynonymous SNV      | NM_001135924:c.C3766A;p.Q1256K      | rs6967385   | Hetero | Hetero | Hetero | Hetero | Hetero |
| SLC10A5                   | 8q21.13  | nonsynonymous SNV      | NM_001010893:c.G140C;p.S47T         | rs78323957  | Hetero | Hetero | Hetero | Hetero | Hetero |
| CNGB3                     | 8q21.3   | nonsynonymous SNV      | NM_019098:c.A2264G;p.E755G          | rs3735972   | Hetero | Hetero | Hetero | Hetero | Hetero |
| RBM12B                    | 8q22.1   | nonsynonymous SNV      | NM_203390:c.A2590C;p.N864H          | rs16916188  | Hetero | Hetero | Hetero | Hetero | Hetero |
| EPPK1                     | 8q24.3   | nonsynonymous SNV      | NM_031308:c.G7091A;p.R2364Q         | .           | Hetero | Hetero | Hetero | Hetero | Hetero |
| LAMC3                     | 9q34.12  | nonsynonymous SNV      | NM_006059:c.G4376A;p.R1459Q         | rs4740412   | Hetero | Hetero | Hetero | Hetero | Hetero |
| PRRC2B                    | 9q34.13  | nonsynonymous SNV      | NM_013318:c.C3805T;p.R1269W         | .           | Hetero | Hetero | Hetero | Hetero | Hetero |
| SETX                      | 9q34.13  | nonsynonymous SNV      | NM_015046:c.T3455G;p.F1152C         | rs3739922   | Hetero | Hetero | Hetero | Hetero | Hetero |
| TSC1                      | 9q34.13  | nonsynonymous SNV      | NM_001162427:c.T812C;p.M271T        | rs1073123   | Hetero | Hetero | Hetero | Hetero | Hetero |
| SURF6                     | 9q34.2   | nonsynonymous SNV      | NM_006753:c.C524T;p.T175M           | rs886089    | Hetero | Hetero | Hetero | Hetero | Hetero |
| SURF6                     | 9q34.2   | nonsynonymous SNV      | NM_006753:c.C487T;p.R163W           | rs886090    | Hetero | Hetero | Hetero | Hetero | Hetero |
| PRMT3                     | 11p15.1  | nonsynonymous SNV      | NM_001145166:c.C1132G;p.L378V       | rs3758805   | Hetero | Hetero | Hetero | Hetero | Hetero |
| SLC5A12                   | 11p14.2  | nonsynonymous SNV      | NM_178498:c.G22A;p.V8I              | rs113908376 | Hetero | Hetero | Hetero | Hetero | Hetero |
| NR1H3                     | 11p11.2  | nonsynonymous SNV      | NM_001130101:c.T1017A;p.H339Q       | rs78765998  | Hetero | Hetero | Hetero | Hetero | Hetero |
| AGBL2                     | 11p11.2  | nonsynonymous SNV      | NM_024783:c.A2135C;p.D712A          | .           | Hetero | Hetero | Hetero | Hetero | Hetero |
| OR4C15                    | 11q11    | nonsynonymous SNV      | NM_001001920:c.G757A;p.V253I        | rs12790125  | Hetero | Hetero | Hetero | Hetero | Hetero |
| OR4C16                    | 11q11    | nonsynonymous SNV      | NM_001004701:c.G73T;p.V25L          | rs12800642  | Hetero | Hetero | Hetero | Hetero | Hetero |
| OR4C11                    | 11q11    | nonsynonymous SNV      | NM_001004700:c.T43A;p.L15I          | rs11230346  | Hetero | Homo   | Hetero | Hetero | Hetero |
| OR8K5                     | 11q12.1  | nonsynonymous SNV      | NM_001004058:c.G31A;p.E11K          | rs79004948  | Hetero | Hetero | Hetero | Hetero | Hetero |
| OR5A2                     | 11q12.1  | nonsynonymous SNV      | NM_001001954:c.C515T;p.P172L        | rs1453547   | Hetero | Hetero | Hetero | Hetero | Hetero |
| OR4D6                     | 11q12.1  | nonsynonymous SNV      | NM_001004708:c.A175G;p.M59V         | rs1453544   | Hetero | Hetero | Hetero | Hetero | Hetero |
| OR4D6                     | 11q12.1  | nonsynonymous SNV      | NM_001004708:c.G452C;p.S151T        | rs1453542   | Hetero | Hetero | Hetero | Hetero | Hetero |
| OR4D6                     | 11q12.1  | nonsynonymous SNV      | NM_001004708:c.T788C;p.M263T        | rs1453541   | Hetero | Hetero | Hetero | Hetero | Hetero |
| MS4A2                     | 11q12.1  | nonsynonymous SNV      | NM_000139:c.A710G;p.E237G           | rs569108    | Hetero | Hetero | Hetero | Hetero | Hetero |
| SLC15A3                   | 11q12.2  | nonsynonymous SNV      | NM_016582:c.G269T;p.G90V            | .           | Hetero | Hetero | Hetero | Hetero | Hetero |
| DAGLA                     | 11q12.2  | nonsynonymous SNV      | NM_006133:c.C2666T;p.P889L          | rs3741252   | Hetero | Hetero | Hetero | Hetero | Hetero |
| SLC22A24                  | 11q12.3  | stopgain SNV           | NM_001136506:c.C1225T;p.Q409X       | rs77002186  | Hetero | Hetero | Hetero | Hetero | Hetero |
| NUDT22                    | 11q13.1  | nonsynonymous SNV      | NM_001128612:c.G106T;p.G36C         | rs2286612   | Hetero | Hetero | Hetero | Hetero | Hetero |
| CCDC88B                   | 11q13.1  | nonsynonymous SNV      | NM_032251:c.T579G;p.D193E           | rs647152    | Hetero | Hetero | Hetero | Hetero | Hetero |
| CCDC88B                   | 11q13.1  | nonsynonymous SNV      | NM_032251:c.T1915C;p.W639R          | rs685870    | Hetero | Hetero | Hetero | Hetero | Hetero |
| CATSPER1                  | 11q13.1  | nonsynonymous SNV      | NM_053054:c.C883T;p.R295W           | .           | Hetero | Hetero | Hetero | Hetero | Hetero |
| SLC29A2                   | 11q13.2  | nonsynonymous SNV      | NM_001532:c.T475G;p.Y159D           | .           | Hetero | Hetero | Hetero | Hetero | Hetero |
| LRFN4                     | 11q13.2  | nonsynonymous SNV      | NM_024036:c.T1019C;p.V340A          | rs3741194   | Hetero | Hetero | Hetero | Hetero | Hetero |
| MRGPRF                    | 11q13.3  | nonsynonymous SNV      | NM_001098515:c.T509C;p.L170P        | .           | Hetero | Hetero | Hetero | Hetero | Hetero |
| MYEOV                     | 11q13.3  | frameshift deletion    | NM_138768:c.807delG;p.L269fs        | .           | Hetero | Hetero | Hetero | Hetero | Hetero |
| CCND1                     | 11q13.3  | nonframeshift deletion | NM_053056:c.826_828del;p.276_276del | .           | Hetero | Hetero | Hetero | Hetero | Hetero |
| CTTN                      | 11q13.3  | nonsynonymous SNV      | NM_001184740:c.C1030T;p.R344W       | .           | Hetero | Hetero | Hetero | Hetero | Hetero |
| USP35                     | 11q14.1  | nonsynonymous SNV      | NM_020798:c.G706A;p.V236M           | rs2510044   | Hetero | Hetero | Hetero | Hetero | Hetero |
| USP35                     | 11q14.1  | nonsynonymous SNV      | NM_020798:c.A2029G;p.I677V          | rs2511188   | Hetero | Hetero | Hetero | Hetero | Hetero |
| ATP8A2                    | 13q12.13 | nonsynonymous SNV      | NM_016529:c.G1872T;p.L624F          | .           | Hetero | Hetero | Hetero | Hetero | Hetero |
| OR4K13                    | 14q11.2  | nonsynonymous SNV      | NM_001004714:c.C316T;p.L106F        | rs76336343  | Hetero | Hetero | Hetero | Hetero | Hetero |
| VPS13C                    | 15q22.2  | nonsynonymous SNV      | NM_017684:c.G10718A;p.G3573D        | rs77673743  | Hetero | Hetero | Hetero | Hetero | Hetero |
| ZWILCH                    | 15q22.31 | nonsynonymous SNV      | NM_017975:c.A1030G;p.S344G          | rs11071896  | Hetero | Hetero | Hetero | Hetero | Hetero |
| PAQR5                     | 15q23    | nonsynonymous SNV      | NM_001104554:c.G32A;p.S11N          | rs73440972  | Hetero | Hetero | Hetero | Hetero | Hetero |
| RGMA                      | 15q26.1  | nonsynonymous SNV      | NM_001166286:c.C1249T;p.R417W       | rs2272452   | Hetero | Hetero | Hetero | Hetero | Hetero |
| RGMA                      | 15q26.1  | nonsynonymous SNV      | NM_001166286:c.C1244T;p.A415V       | rs4778078   | Hetero | Hetero | Hetero | Hetero | Hetero |
| SLFN12                    | 17q12    | nonsynonymous SNV      | NM_018042:c.T129G;p.S43R            | rs1849733   | Hetero | Hetero | Hetero | Hetero | Hetero |
| ENGASE                    | 17q25.3  | nonsynonymous SNV      | NM_001042573:c.C14A;p.A5E           | rs56107536  | Hetero | Hetero | Hetero | Hetero | Hetero |
| ENGASE                    | 17q25.3  | nonsynonymous SNV      | NM_001042573:c.G1787A;p.S596N       | rs4789879   | Hetero | Hetero | Hetero | Hetero | Hetero |
| SGSH                      | 17q25.3  | nonsynonymous SNV      | NM_000199:c.G1367A;p.R456H          | rs7503034   | Hetero | Hetero | Hetero | Hetero | Hetero |
| RNF213                    | 17q25.3  | nonsynonymous SNV      | NM_001256071:c.G13195A;p.A4399T     | rs148731719 | Hetero | Hetero | Hetero | Hetero | Hetero |
| AZI1                      | 17q25.3  | nonsynonymous SNV      | NM_001009811:c.G1822A;p.A608T       | rs4613097   | Hetero | Hetero | Hetero | Hetero | Hetero |
| SLC25A10                  | 17q25.3  | nonsynonymous SNV      | NM_012140:c.A685T;p.N229Y           | .           | Hetero | Hetero | Hetero | Hetero | Hetero |
| CD7                       | 17q25.3  | nonsynonymous SNV      | NM_006137:c.C629T;p.S210Y           | .           | Hetero | Hetero | Hetero | Hetero | Hetero |
| CD7                       | 17q25.3  | nonsynonymous SNV      | NM_006137:c.C602T;p.A201V           | .           | Hetero | Hetero | Hetero | Hetero | Hetero |
| MADCAM1                   | 19p13.3  | nonsynonymous SNV      | NM_130760:c.G700A;p.D234N           | rs72970252  | Hetero | Hetero | Hetero | Hetero | Hetero |

|         |          |                        |                                     |            |        |        |        |        |        |
|---------|----------|------------------------|-------------------------------------|------------|--------|--------|--------|--------|--------|
| WDR18   | 19p13.3  | nonsynonymous SNV      | NM_024100:c.G790A:p.V264I           | rs11538683 | Hetero | Hetero | Hetero | Hetero | Hetero |
| GRIN3B  | 19p13.3  | nonsynonymous SNV      | NM_138690:c.G737A:p.R246H           | rs55646937 | Hetero | Hetero | Hetero | Hetero | Hetero |
| GRIN3B  | 19p13.3  | nonsynonymous SNV      | NM_138690:c.C1570T:p.R524W          | .          | Hetero | Hetero | Hetero | Hetero | Hetero |
| REEP6   | 19p13.3  | nonsynonymous SNV      | NM_138393:c.C449A:p.A150D           | rs2271412  | Hetero | Hetero | Hetero | Hetero | Hetero |
| ATP8B3  | 19p13.3  | nonsynonymous SNV      | NM_001178002:c.G478A:p.A160T        | rs45574836 | Hetero | Hetero | Hetero | Hetero | Hetero |
| ZNF57   | 19p13.3  | nonsynonymous SNV      | NM_173480:c.C688T:p.R230W           | rs2288957  | Hetero | Hetero | Hetero | Hetero | Hetero |
| ADAMTS1 | 21q21.3  | nonsynonymous SNV      | NM_006988:c.G2108A:p.R703H          | rs56251528 | Hetero | Hetero | Hetero | Hetero | Hetero |
| TIAM1   | 21q22.11 | nonsynonymous SNV      | NM_003253:c.C3059A:p.S1020Y         | .          | Hetero | Hetero | Hetero | Hetero | Hetero |
| HUNK    | 21q22.11 | nonsynonymous SNV      | NM_014586:c.C1771T:p.R591C          | rs10775648 | Hetero | Hetero | Hetero | Hetero | Hetero |
| CLIC6   | 21q22.12 | nonframeshift deletion | NM_053277:c.776_805del:p.259_269del | .          | Hetero | Hetero | Hetero | Hetero | Hetero |
| CLIC6   | 21q22.12 | nonsynonymous SNV      | NM_053277:c.C892G:p.Q298E           | rs13049028 | Hetero | Hetero | Hetero | Hetero | Hetero |
| SIK1    | 21q22.3  | nonsynonymous SNV      | NM_173354:c.G43A:p.G15S             | rs3746951  | Hetero | Hetero | Hetero | Hetero | Hetero |
| PFKL    | 21q22.3  | nonsynonymous SNV      | NM_002626:c.A710T:p.D237V           | rs1057037  | Hetero | Hetero | Hetero | Hetero | Hetero |
| TBX1    | 22q11.21 | frameshift deletion    | NM_080647:c.1253delA:p.Y418fs       | .          | Hetero | Hetero | Hetero | Hetero | Hetero |
| LRCH2   | Xq23     | nonsynonymous SNV      | NM_001243963:c.G1606A:p.D536N       | .          | Hetero | Hetero | Homo   | Hetero | Homo   |

<Synonymous variants>

|          |         |                |                                |             |        |        |        |        |        |
|----------|---------|----------------|--------------------------------|-------------|--------|--------|--------|--------|--------|
| ABCA4    | 1p22.1  | synonymous SNV | NM_000350:c.C1269T:p.H423H     | rs4147831   | Hetero | Hetero | Hetero | Hetero | Hetero |
| SLC44A3  | 1p21.3  | synonymous SNV | NM_152369:c.T312C:p.Y104Y      | rs2640065   | Hetero | Hetero | Hetero | Hetero | Hetero |
| PRKCE    | 2p21    | synonymous SNV | NM_005400:c.C1572T:p.H524H     | rs17034455  | Homo   | Hetero | Hetero | Hetero | Hetero |
| SNED1    | 2q37.3  | synonymous SNV | NM_001080437:c.C3912T:p.I1304I | .           | Hetero | Hetero | Hetero | Hetero | Hetero |
| DTYMK    | 2q37.3  | synonymous SNV | NM_012145:c.T345C:p.D115D      | rs1131195   | Hetero | Hetero | Hetero | Hetero | Hetero |
| OXTR     | 3p25.3  | synonymous SNV | NM_000916:c.C690T:p.N230N      | rs237902    | Hetero | Hetero | Hetero | Hetero | Hetero |
| THUMPD3  | 3p25.3  | synonymous SNV | NM_001114092:c.G1284C:p.R428R  | rs1046788   | Hetero | Hetero | Hetero | Hetero | Hetero |
| ATP2B2   | 3p25.3  | synonymous SNV | NM_001683:c.C1416T:p.G472G     | rs2289273   | Hetero | Hetero | Hetero | Hetero | Hetero |
| ATP2B2   | 3p25.3  | synonymous SNV | NM_001683:c.C1302T:p.N434N     | rs2289274   | Hetero | Hetero | Hetero | Hetero | Hetero |
| SLC6A11  | 3p25.3  | synonymous SNV | NM_014229:c.C1572T:p.C524C     | rs2272400   | Hetero | Hetero | Hetero | Hetero | Hetero |
| TAMM41   | 3p25.2  | synonymous SNV | NM_138807:c.G120C:p.P40P       | rs408600    | Hetero | Hetero | Hetero | Hetero | Hetero |
| LACL1    | 3p25.1  | synonymous SNV | NM_012260:c.G1119A:p.L373L     | rs905650    | Hetero | Hetero | Hetero | Hetero | Hetero |
| HAMA4    | 6q21    | synonymous SNV | NM_001105206:c.C651T:p.T217T   | rs2072021   | Homo   | Hetero | Hetero | Hetero | Hetero |
| THSD7A   | 7p21.3  | synonymous SNV | NM_015204:c.A1890G:p.P630P     | rs3735502   | Hetero | Hetero | Hetero | Hetero | Hetero |
| ZFXH4    | 8q21.11 | synonymous SNV | NM_024721:c.C6708T:p.Y2236Y    | rs2728455   | Hetero | Hetero | Hetero | Hetero | Hetero |
| SLC10A5  | 8q21.13 | synonymous SNV | NM_001010893:c.A792G:p.S264S   | rs6995098   | Hetero | Hetero | Hetero | Hetero | Hetero |
| FAM82B   | 8q21.3  | synonymous SNV | NM_016033:c.C510T:p.C170C      | rs11539113  | Hetero | Hetero | Hetero | Hetero | Hetero |
| CNGB3    | 8q21.3  | synonymous SNV | NM_019098:c.A2214G:p.E738E     | rs3735970   | Hetero | Hetero | Hetero | Hetero | Hetero |
| CDH17    | 8q22.1  | synonymous SNV | NM_001144663:c.C2064T:p.F688F  | rs2251734   | Hetero | Hetero | Hetero | Hetero | Hetero |
| CDH17    | 8q22.1  | synonymous SNV | NM_001144663:c.C1797T:p.S599S  | rs35792427  | Hetero | Hetero | Hetero | Hetero | Hetero |
| PRRC2B   | 9q34.13 | synonymous SNV | NM_013318:c.C2715T:p.N905N     | rs17458486  | Hetero | Hetero | Hetero | Hetero | Hetero |
| PRRC2B   | 9q34.13 | synonymous SNV | NM_013318:c.C3984T:p.P1328P    | rs113338693 | Hetero | Hetero | Hetero | Hetero | Hetero |
| PRRC2B   | 9q34.13 | synonymous SNV | NM_013318:c.A5187G:p.Q1729Q    | rs2275498   | Hetero | Hetero | Hetero | Hetero | Hetero |
| TSC1     | 9q34.13 | synonymous SNV | NM_001162427:c.A1182G:p.E394E  | rs7862221   | Hetero | Hetero | Hetero | Hetero | Hetero |
| ADAMTSL2 | 9q34.2  | synonymous SNV | NM_001145320:c.C900T:p.I300I   | rs2073877   | Hetero | Hetero | Hetero | Hetero | Hetero |
| SARDH    | 9q34.2  | synonymous SNV | NM_001134707:c.G150A:p.Q50Q    | rs573904    | Hetero | Hetero | Hetero | Hetero | Hetero |
| EHF      | 11p13   | synonymous SNV | NM_001206615:c.T756A:p.I252I   | rs286891    | Hetero | Hetero | Hetero | Hetero | Hetero |
| SYT13    | 11p11.2 | synonymous SNV | NM_020826:c.G651T:p.L217L      | .           | Hetero | Hetero | Hetero | Hetero | Hetero |
| CHRM4    | 11p11.2 | synonymous SNV | NM_000741:c.C777T:p.P259P      | .           | Hetero | Hetero | Hetero | Hetero | Hetero |
| OR4C16   | 11q11   | synonymous SNV | NM_001004701:c.C99T:p.Y33Y     | rs34100491  | Hetero | Hetero | Hetero | Hetero | Hetero |
| OR5W2    | 11q11   | synonymous SNV | NM_001001960:c.C723T:p.C241C   | rs11231529  | Hetero | Hetero | Hetero | Hetero | Hetero |
| OR5F1    | 11q12.1 | synonymous SNV | NM_003697:c.A42G:p.L14L        | rs71490418  | Hetero | Hetero | Hetero | Hetero | Hetero |
| OR8J3    | 11q12.1 | synonymous SNV | NM_001004064:c.G816A:p.K272K   | .           | Hetero | Hetero | Hetero | Hetero | Hetero |
| OR5AK2   | 11q12.1 | synonymous SNV | NM_001005323:c.G633A:p.G211G   | rs61886711  | Hetero | Hetero | Hetero | Hetero | Hetero |
| OR5A1    | 11q12.1 | synonymous SNV | NM_001004728:c.C120G:p.T40T    | rs11605572  | Hetero | Hetero | Hetero | Hetero | Hetero |
| OR5A1    | 11q12.1 | synonymous SNV | NM_001004728:c.C780T:p.F260F   | rs17591107  | Hetero | Hetero | Hetero | Hetero | Hetero |
| B3GAT3   | 11q12.3 | synonymous SNV | NM_012200:c.C108T:p.P36P       | rs75316688  | Hetero | Hetero | Hetero | Hetero | Hetero |
| C11orf84 | 11q13.1 | synonymous SNV | NM_138471:c.C1083T:p.P361P     | .           | Hetero | Hetero | Hetero | Hetero | Hetero |
| CCDC88B  | 11q13.1 | synonymous SNV | NM_032251:c.G1095C:p.A365A     | rs479552    | Hetero | Hetero | Hetero | Hetero | Hetero |
| NRXN2    | 11q13.1 | synonymous SNV | NM_138732:c.C930T:p.A310A      | rs2285341   | Hetero | Hetero | Hetero | Hetero | Hetero |
| LTBP3    | 11q13.1 | synonymous SNV | NM_001130144:c.C3108T:p.D1036D | rs79320058  | Hetero | Hetero | Hetero | Hetero | Hetero |
| PCNXL3   | 11q13.1 | synonymous SNV | NM_032223:c.T3138A:p.R1046R    | .           | Hetero | Hetero | Hetero | Hetero | Hetero |
| DPP3     | 11q13.2 | synonymous SNV | NM_005700:c.A1938G:p.T646T     | rs1671063   | Hetero | Hetero | Hetero | Hetero | Hetero |
| CTSF     | 11q13.2 | synonymous SNV | NM_003793:c.T1401C:p.R467R     | rs572846    | Hetero | Hetero | Hetero | Hetero | Hetero |
| CTSF     | 11q13.2 | synonymous SNV | NM_003793:c.G762A:p.R254R      | rs545009    | Hetero | Hetero | Hetero | Hetero | Hetero |
| CTSF     | 11q13.2 | synonymous SNV | NM_003793:c.C126T:p.P42P       | rs1044522   | Hetero | Hetero | Hetero | Hetero | Hetero |
| C11orf80 | 11q13.2 | synonymous SNV | NM_024650:c.G1974C:p.V658V     | rs7570      | Hetero | Hetero | Hetero | Hetero | Hetero |
| ACY3     | 11q13.2 | synonymous SNV | NM_080658:c.C513G:p.A171A      | rs17148450  | Hetero | Hetero | Hetero | Hetero | Hetero |
| POLD3    | 11q13.4 | synonymous SNV | NM_006591:c.T426C:p.P142P      | rs4944052   | Hetero | Hetero | Hetero | Hetero | Hetero |
| ARRB1    | 11q13.4 | synonymous SNV | NM_004041:c.C333T:p.H111H      | rs877711    | Hetero | Hetero | Hetero | Hetero | Hetero |
| UVRAG    | 11q13.5 | synonymous SNV | NM_003369:c.C2091T:p.S697S     | rs636420    | Hetero | Hetero | Hetero | Hetero | Hetero |
| C11orf30 | 11q13.5 | synonymous SNV | NM_020193:c.T3648C:p.T1216T    | rs3753051   | Hetero | Hetero | Hetero | Hetero | Hetero |
| OMP      | 11q13.5 | synonymous SNV | NM_006189:c.G225A:p.P75P       | rs2233549   | Hetero | Hetero | Hetero | Hetero | Hetero |
| MYO7A    | 11q13.5 | synonymous SNV | NM_000260:c.T783C:p.G261G      | rs762667    | Hetero | Hetero | Hetero | Hetero | Hetero |
| USP35    | 11q14.1 | synonymous SNV | NM_020798:c.C1962A:p.P654P     | rs2512527   | Hetero | Hetero | Hetero | Hetero | Hetero |

|          |          |                |                               |             |        |        |        |        |        |
|----------|----------|----------------|-------------------------------|-------------|--------|--------|--------|--------|--------|
| RNASE2   | 14q11.2  | synonymous SNV | NM_002934:c.A435G:p.R145R     | rs8013670   | Hetero | Hetero | Hetero | Hetero | Hetero |
| LIPC     | 15q21.3  | synonymous SNV | NM_000236:c.G465T:p.V155V     | rs690       | Hetero | Hetero | Hetero | Hetero | Hetero |
| LIPC     | 15q21.3  | synonymous SNV | NM_000236:c.C1437A:p.T479T    | rs6074      | Hetero | Hetero | Hetero | Hetero | Hetero |
| LDHAL6B  | 15q22.2  | synonymous SNV | NM_033195:c.C105A:p.R35R      | rs12437573  | Hetero | Hetero | Hetero | Hetero | Hetero |
| VPS13C   | 15q22.2  | synonymous SNV | NM_017684:c.A8859T:p.P2953P   | rs9920256   | Hetero | Hetero | Hetero | Hetero | Hetero |
| VPS13C   | 15q22.2  | synonymous SNV | NM_017684:c.T7167C:p.V2389V   | rs114090703 | Hetero | Hetero | Hetero | Hetero | Hetero |
| DIS3L    | 15q22.31 | synonymous SNV | NM_001143688:c.T1221C:p.N407N | rs17851970  | Hetero | Hetero | Hetero | Hetero | Hetero |
| SMAD6    | 15q22.31 | synonymous SNV | NM_001142861:c.C384T:p.F128F  | rs12591946  | Hetero | Hetero | Hetero | Hetero | Hetero |
| KIF23    | 15q23    | synonymous SNV | NM_004856:c.C108A:p.G36G      | rs3759826   | Hetero | Hetero | Hetero | Hetero | Hetero |
| TIMP2    | 17q25.3  | synonymous SNV | NM_003255:c.G303A:p.S101S     | rs2277698   | Hetero | Hetero | Hetero | Hetero | Hetero |
| AZI1     | 17q25.3  | synonymous SNV | NM_001009811:c.G2331A:p.A777A | rs3744150   | Hetero | Hetero | Hetero | Hetero | Hetero |
| AZI1     | 17q25.3  | synonymous SNV | NM_001009811:c.C2010T:p.H670H | rs61741559  | Hetero | Hetero | Hetero | Hetero | Hetero |
| SLC38A10 | 17q25.3  | synonymous SNV | NM_001037984:c.A2700G:p.A900A | rs61740863  | Hetero | Hetero | Hetero | Hetero | Hetero |
| SLC38A10 | 17q25.3  | synonymous SNV | NM_001037984:c.C1578T:p.H526H | rs3803767   | Hetero | Hetero | Hetero | Hetero | Hetero |
| TPGS1    | 19p13.3  | synonymous SNV | NM_033513:c.G786A:p.G262G     | rs112370786 | Hetero | Hetero | Hetero | Hetero | Hetero |
| WDR18    | 19p13.3  | synonymous SNV | NM_024100:c.T945C:p.N315N     | rs1127043   | Hetero | Hetero | Hetero | Hetero | Hetero |
| GRIN3B   | 19p13.3  | synonymous SNV | NM_138690:c.C1308T:p.D436D    | rs61736783  | Hetero | Hetero | Hetero | Hetero | Hetero |
| AMH      | 19p13.3  | synonymous SNV | NM_000479:c.G546A:p.P182P     | rs17854573  | Hetero | Hetero | Hetero | Hetero | Hetero |
| LINGO3   | 19p13.3  | synonymous SNV | NM_001101391:c.C906G:p.A302A  | rs8111892   | Hetero | Hetero | Hetero | Hetero | Hetero |
| TMPRSS9  | 19p13.3  | synonymous SNV | NM_182973:c.C930T:p.P310P     | rs192837972 | Hetero | Hetero | Hetero | Hetero | Hetero |
| SGTA     | 19p13.3  | synonymous SNV | NM_003021:c.C234A:p.P78P      | rs1128925   | Hetero | Hetero | Hetero | Hetero | Hetero |
| CCT8     | 21q21.3  | synonymous SNV | NM_006585:c.C540G:p.A180A     | .           | Hetero | Hetero | Hetero | Hetero | Hetero |
| SCAF4    | 21q22.11 | synonymous SNV | NM_001145444:c.A834G:p.A278A  | rs7280330   | Hetero | Hetero | Hetero | Hetero | Hetero |
| OLIG2    | 21q22.11 | synonymous SNV | NM_005806:c.A231G:p.S77S      | rs762178    | Hetero | Hetero | Hetero | Hetero | Hetero |
| CLIC6    | 21q22.12 | synonymous SNV | NM_053277:c.G897A:p.S299S     | rs13049239  | Hetero | Hetero | Hetero | Hetero | Hetero |
| CLIC6    | 21q22.12 | synonymous SNV | NM_053277:c.C1533T:p.F511F    | rs6517254   | Hetero | Hetero | Hetero | Hetero | Hetero |
| HLCS     | 21q22.13 | synonymous SNV | NM_000411:c.C834T:p.S278S     | rs1065758   | Hetero | Hetero | Hetero | Hetero | Hetero |
| DSCAM    | 21q22.2  | synonymous SNV | NM_001389:c.C2655T:p.P885P    | rs2297267   | Hetero | Hetero | Hetero | Hetero | Hetero |
| MX1      | 21q22.3  | synonymous SNV | NM_001178046:c.T1323C:p.R441R | rs2070229   | Hetero | Hetero | Hetero | Hetero | Hetero |
| RRP1     | 21q22.3  | synonymous SNV | NM_003683:c.C49T:p.L17L       | rs78489660  | Hetero | Hetero | Hetero | Hetero | Hetero |
| PFKL     | 21q22.3  | synonymous SNV | NM_002626:c.G1233T:p.A411A    | .           | Hetero | Hetero | Hetero | Hetero | Hetero |
