# Supplementary material for: TBX1 Mutation Identified by Exome Sequencing in a Japanese Family with 22q11.2 Deletion Syndrome-Like Craniofacial Features and Hypocalcemia
Source: PubMed Central journal article supplement (PMC3956758; doi:10.1371/journal.pone.0091598), 2014-03-17
Supplement: pone.0091598.s005.pdf [file pone.0091598.s005.pdf]

Supplemental Table 3. A list of variants that are present in group 1 and absent from groups 2+3.

| Gene                      | Location | Type                | Substitution                   | dbSNP       | II-2   | III-5  | III-7  |
|---------------------------|----------|---------------------|--------------------------------|-------------|--------|--------|--------|
| <Non-synonymous variants> |          |                     |                                |             |        |        |        |
| RETNLB                    | 3q13.13  | nonsynonymous SNV   | NM_032579:c.C59T;p.P20L        | rs11708527  | Hetero | Hetero | Hetero |
| BOC                       | 3q13.2   | nonsynonymous SNV   | NM_033254:c.C664T;p.R222C      |             | Hetero | Hetero | Hetero |
| WDR52                     | 3q13.2   | nonsynonymous SNV   | NM_001164496:c.A3861C;p.K1287N | rs6768642   | Hetero | Hetero | Hetero |
| WDR52                     | 3q13.2   | nonsynonymous SNV   | NM_001164496:c.C2234T;p.P745L  | rs58988763  | Hetero | Hetero | Hetero |
| WDR52                     | 3q13.2   | nonsynonymous SNV   | NM_001164496:c.G852T;p.K284N   | rs16845107  | Hetero | Hetero | Hetero |
| SPICE1                    | 3q13.2   | nonsynonymous SNV   | NM_144718:c.C823G;p.L275V      | rs16861032  | Hetero | Hetero | Hetero |
| POLQ                      | 3q13.33  | nonsynonymous SNV   | NM_199420:c.A3602G;p.H1201R    | rs3218651   | Hetero | Hetero | Hetero |
| POLQ                      | 3q13.33  | nonsynonymous SNV   | NM_199420:c.A2884G;p.S962G     | rs3218636   | Hetero | Hetero | Hetero |
| IQCB1                     | 3q13.33  | nonsynonymous SNV   | NM_001023571:c.G902A;p.C301Y   | rs17849995  | Hetero | Hetero | Hetero |
| PARP15                    | 3q21.1   | nonsynonymous SNV   | NM_001113523:c.G124A;p.V42M    | rs1875272   | Hetero | Hetero | Hetero |
| SEMA5B                    | 3q21.1   | nonsynonymous SNV   | NM_001031702:c.C1148G;p.A383G  | rs78693594  | Hetero | Hetero | Hetero |
| TNK2                      | 3q29     | nonsynonymous SNV   | NM_005781:c.G2630A;p.R877H     | rs112384084 | Hetero | Hetero | Hetero |
| FYTTD1                    | 3q29     | nonsynonymous SNV   | NM_001011537:c.C7G;p.P3A       | rs7624719   | Homo   | Hetero | Hetero |
| LRCH3                     | 3q29     | nonsynonymous SNV   | NM_032773:c.C1565T;p.P522L     | rs36078463  | Hetero | Hetero | Hetero |
| IQCG                      | 3q29     | nonsynonymous SNV   | NM_001134435:c.G529C;p.D177H   | rs67877771  | Hetero | Hetero | Hetero |
| IQCG                      | 3q29     | nonsynonymous SNV   | NM_001134435:c.C335A;p.A112D   | rs9880989   | Hetero | Hetero | Hetero |
| CASP8AP2                  | 6q15     | nonsynonymous SNV   | NM_001137667:c.C4975T;p.P1659S | rs3799896   | Hetero | Hetero | Hetero |
| KLHL32                    | 6q16.1   | nonsynonymous SNV   | NM_052904:c.A386G;p.N129S      | rs2294763   | Hetero | Hetero | Hetero |
| PRDM1                     | 6q21     | nonsynonymous SNV   | NM_001198:c.G220A;p.G74S       | rs2185379   | Hetero | Hetero | Hetero |
| ARMC2                     | 6q21     | nonsynonymous SNV   | NM_032131:c.T497C;p.M166T      | rs9386758   | Hetero | Hetero | Hetero |
| AKD1                      | 6q21     | nonsynonymous SNV   | NM_001145128:c.C2443T;p.P815S  | rs10499052  | Hetero | Hetero | Hetero |
| MARCKS                    | 6q21     | nonsynonymous SNV   | NM_002356:c.C821T;p.A274V      | rs3734458   | Hetero | Hetero | Hetero |
| C6orf170                  | 6q22.31  | nonsynonymous SNV   | NM_152730:c.A1795G;p.I599V     | rs7745023   | Hetero | Hetero | Hetero |
| NCOA7                     | 6q22.32  | nonsynonymous SNV   | NM_001199622:c.T657G;p.D219E   | rs1567      | Hetero | Hetero | Hetero |
| LAMA2                     | 6q22.33  | nonsynonymous SNV   | NM_000426:c.G1856A;p.R619H     | rs3816665   | Hetero | Hetero | Hetero |
| TAAR2                     | 6q23.2   | stopgain SNV        | NM_014626:c.G368A;p.W123X      | rs8192646   | Hetero | Hetero | Hetero |
| VNN1                      | 6q23.2   | nonsynonymous SNV   | NM_004666:c.G436A;p.D146N      | rs45624336  | Hetero | Hetero | Hetero |
| AHI1                      | 6q23.3   | nonsynonymous SNV   | NM_001134830:c.A3257G;p.E1086G | rs148000791 | Hetero | Hetero | Hetero |
| MAP3K5                    | 6q23.3   | nonsynonymous SNV   | NM_005923:c.A3748G;p.I1250V    | rs35551087  | Hetero | Hetero | Hetero |
| CCDC28A                   | 6q24.1   | nonsynonymous SNV   | NM_015439:c.C245T;p.P82L       | rs2273510   | Hetero | Hetero | Hetero |
| PHACTR2                   | 6q24.2   | nonsynonymous SNV   | NM_001100165:c.G862A;p.V288I   | rs186432598 | Hetero | Hetero | Hetero |
| LRRTM3                    | 10q21.3  | nonsynonymous SNV   | NM_178011:c.T1589G;p.I530R     | rs75363119  | Hetero | Hetero | Hetero |
| NEUROG3                   | 10q22.1  | nonsynonymous SNV   | NM_020999:c.T596C;p.F199S      | rs4536103   | Hetero | Hetero | Hetero |
| ADAMTS14                  | 10q22.1  | nonsynonymous SNV   | NM_080722:c.C2809A;p.L937M     | rs12774070  | Hetero | Hetero | Hetero |
| ADAMTS14                  | 10q22.1  | nonsynonymous SNV   | NM_080722:c.C3322T;p.P1108S    | rs61573157  | Hetero | Hetero | Hetero |
| EP400                     | 12q24.33 | nonsynonymous SNV   | NM_015409:c.C2494G;p.R832G     |             | Hetero | Hetero | Hetero |
| ZNF268                    | 12q24.33 | nonsynonymous SNV   | NM_001165887:c.A220T;p.M74L    | rs61960670  | Hetero | Hetero | Hetero |
| ZNF268                    | 12q24.33 | nonsynonymous SNV   | NM_001165881:c.G2579C;p.R860T  | rs62644541  | Hetero | Hetero | Hetero |
| LOC647589                 | 12q24.33 | nonsynonymous SNV   | NM_001191054:c.C689G;p.S230C   | rs36146434  | Hetero | Hetero | Hetero |
| CNTNAP4                   | 16q23.1  | nonsynonymous SNV   | NM_138994:c.T3246G;p.D1082E    | rs7202925   | Hetero | Hetero | Hetero |
| WWOX                      | 16q23.1  | nonsynonymous SNV   | NM_130791:c.A544G;p.K182E      | rs77067228  | Hetero | Hetero | Hetero |
| WWOX                      | 16q23.1  | nonsynonymous SNV   | NM_016373:c.G535A;p.A179T      | rs12918952  | Hetero | Hetero | Hetero |
| GP1BA                     | 17p13.2  | frameshift deletion | NM_000173:c.I285delG;p.E429fs  |             | Homo   | Homo   | Homo   |
| CCDC165                   | 18p11.22 | nonsynonymous SNV   | NM_015210:c.A1613G;p.D538G     | rs3744979   | Hetero | Hetero | Hetero |
| PIEZO2                    | 18p11.22 | nonsynonymous SNV   | NM_022068:c.G3443T;p.C1148F    | rs35033671  | Hetero | Hetero | Hetero |
| CEP76                     | 18p11.21 | nonsynonymous SNV   | NM_024899:c.G1327T;p.V443F     |             | Hetero | Hetero | Hetero |
| LAMA3                     | 18q11.2  | nonsynonymous SNV   | NM_001127718:c.C3450A;p.N1150K | rs1154232   | Hetero | Hetero | Hetero |
| COL5A3                    | 19p13.2  | nonsynonymous SNV   | NM_015719:c.G4462C;p.A1488P    | rs3745584   | Hetero | Hetero | Hetero |
| NWD1                      | 19p13.11 | nonsynonymous SNV   | NM_001007525:c.C163T;p.R55W    | rs139873139 | Hetero | Hetero | Hetero |
| NCAN                      | 19p13.11 | nonsynonymous SNV   | NM_004386:c.G2513A;p.S838N     | rs10426537  | Hetero | Hetero | Hetero |
| UR1I                      | 19q12    | nonsynonymous SNV   | NM_003796:c.C82G;p.P28A        |             | Hetero | Hetero | Hetero |
| OGFR                      | 20q13.33 | nonsynonymous SNV   | NM_007346:c.G1670C;p.S557T     | rs78981100  | Hetero | Hetero | Hetero |
| FAM116B                   | 22q13.33 | nonsynonymous SNV   | NM_001001794:c.G1207A;p.V403M  | rs68178377  | Hetero | Hetero | Hetero |
| SPANXD,SPANXE             | Xq27.2   | nonsynonymous SNV   | NM_032417:c.G202C;p.V68L       | rs5953618   | Hetero | Hetero | Hetero |
| <Synonymous variants>     |          |                     |                                |             |        |        |        |
| ARMC9                     | 2q37.1   | synonymous SNV      | NM_025139:c.C1833T;p.L611L     | rs1669083   | Hetero | Hetero | Hetero |
| ARMC9                     | 2q37.1   | synonymous SNV      | NM_025139:c.G1866A;p.T622T     | rs1669084   | Hetero | Hetero | Hetero |
| DGKD                      | 2q37.1   | synonymous SNV      | NM_003648:c.C1800T;p.F600F     | rs146366997 | Hetero | Hetero | Hetero |
| HJURP                     | 2q37.1   | synonymous SNV      | NM_018410:c.C2157T;p.P719P     | rs3771334   | Hetero | Hetero | Hetero |
| TRPM8                     | 2q37.1   | synonymous SNV      | NM_024080:c.A747T;p.P249P      | rs28901637  | Hetero | Hetero | Hetero |
| MORC1                     | 3q13.13  | synonymous SNV      | NM_014429:c.G2340C;p.P780P     | rs75923723  | Hetero | Hetero | Hetero |
| MORC1                     | 3q13.13  | synonymous SNV      | NM_014429:c.G2337C;p.V779V     | rs76539963  | Hetero | Hetero | Hetero |
| BOC                       | 3q13.2   | synonymous SNV      | NM_033254:c.C903T;p.A301A      | rs3814399   | Hetero | Hetero | Hetero |
| BOC                       | 3q13.2   | synonymous SNV      | NM_033254:c.C2985T;p.D995D     | rs34600669  | Hetero | Hetero | Hetero |
| WDR52                     | 3q13.2   | synonymous SNV      | NM_001164496:c.A4176G;p.L1392L | rs7650771   | Hetero | Hetero | Hetero |
| WDR52                     | 3q13.2   | synonymous SNV      | NM_001164496:c.C156T;p.T52T    | rs58474121  | Hetero | Hetero | Hetero |
| SPICE1                    | 3q13.2   | synonymous SNV      | NM_144718:c.G2301A;p.Q767Q     | rs11920725  | Hetero | Hetero | Hetero |
| SIDT1                     | 3q13.2   | synonymous SNV      | NM_017699:c.C174T;p.L58L       | rs3732799   | Hetero | Hetero | Hetero |

|           |          |                |                                |             |        |        |        |
|-----------|----------|----------------|--------------------------------|-------------|--------|--------|--------|
| SIDT1     | 3q13.2   | synonymous SNV | NM_017699:c.G1368T:p.A456A     |             | Hetero | Hetero | Hetero |
| TNK2      | 3q29     | synonymous SNV | NM_005781:c.C1719T:p.F573F     | rs1056726   | Hetero | Hetero | Hetero |
| LRRC33    | 3q29     | synonymous SNV | NM_198565:c.G1893A:p.T631T     | rs116984491 | Hetero | Hetero | Hetero |
| BACH2     | 6q15     | synonymous SNV | NM_001170794:c.C1071T:p.P357P  | rs2236182   | Hetero | Hetero | Hetero |
| ARMC2     | 6q21     | synonymous SNV | NM_032131:c.T1314C:p.G438G     | rs11153136  | Hetero | Hetero | Hetero |
| VGLL2     | 6q22.1   | synonymous SNV | NM_182645:c.T441C:p.N147N      | rs13194610  | Hetero | Hetero | Hetero |
| ROS1      | 6q22.1   | synonymous SNV | NM_002944:c.A6247C:p.R2083R    | rs552183    | Hetero | Hetero | Hetero |
| GRM1      | 6q24.3   | synonymous SNV | NM_000838:c.T3213G:p.P1071P    | rs1047006   | Hetero | Hetero | Hetero |
| PBLD      | 10q21.3  | synonymous SNV | NM_001033083:c.G516A:p.S172S   |             | Hetero | Hetero | Hetero |
| AIFM2     | 10q22.1  | synonymous SNV | NM_001198696:c.C729T:p.T243T   | rs118135233 | Hetero | Hetero | Hetero |
| NPFPR1    | 10q22.1  | synonymous SNV | NM_022146:c.C201T:p.I67I       | rs3812696   | Hetero | Hetero | Hetero |
| ADAMTS14  | 10q22.1  | synonymous SNV | NM_080722:c.C2856T:p.C952C     | rs2587475   | Hetero | Hetero | Hetero |
| SGPL1     | 10q22.1  | synonymous SNV | NM_003901:c.A1305G:p.E435E     | rs114461640 | Hetero | Hetero | Hetero |
| ZC3H12C   | 11q22.3  | synonymous SNV | NM_033390:c.A2445G:p.Q815Q     | rs74548991  | Hetero | Hetero | Hetero |
| GOLGA3    | 12q24.33 | synonymous SNV | NM_001172557:c.A414G:p.T138T   | rs7134809   | Hetero | Hetero | Hetero |
| ZNF140    | 12q24.33 | synonymous SNV | NM_003440:c.A792G:p.Q264Q      | rs710945    | Hetero | Hetero | Hetero |
| LOC647589 | 12q24.33 | synonymous SNV | NM_001191054:c.G351A:p.P117P   | rs147259575 | Hetero | Hetero | Hetero |
| LOC647589 | 12q24.33 | synonymous SNV | NM_001191054:c.C240G:p.R80R    | rs141475940 | Hetero | Hetero | Hetero |
| HNRNPA1L2 | 13q14.3  | synonymous SNV | NM_001011725:c.C408A:p.I136I   | rs78145640  | Homo   | Hetero | Hetero |
| CNTNAP4   | 16q23.1  | synonymous SNV | NM_138994:c.T3375C:p.T1125T    | rs7184958   | Hetero | Hetero | Hetero |
| KRTAP4-8  | 17q21.2  | synonymous SNV | NM_031960:c.C522T:p.C174C      | rs77163010  | Homo   | Hetero | Hetero |
| LAMA3     | 18q11.2  | synonymous SNV | NM_001127718:c.C1152G:p.A384A  | rs1154226   | Hetero | Hetero | Hetero |
| LAMA3     | 18q11.2  | synonymous SNV | NM_001127718:c.C3736T:p.L1246L | rs1131521   | Hetero | Hetero | Hetero |
| TMEM38A   | 19p13.11 | synonymous SNV | NM_024074:c.C189T:p.F63F       | rs730120    | Hetero | Hetero | Hetero |
| MAST3     | 19p13.11 | synonymous SNV | NM_015016:c.C648T:p.H216H      |             | Hetero | Hetero | Hetero |
| KIAA1683  | 19p13.11 | synonymous SNV | NM_001145304:c.C2787T:p.P929P  | rs12608744  | Hetero | Hetero | Hetero |
| KIAA1683  | 19p13.11 | synonymous SNV | NM_001145304:c.G2691A:p.L897L  | rs12608843  | Hetero | Hetero | Hetero |
| NCAN      | 19p13.11 | synonymous SNV | NM_004386:c.G2856A:p.P952P     | rs10406347  | Hetero | Hetero | Hetero |
| VSTM2B    | 19q12    | synonymous SNV | NM_001146339:c.G666C:p.S222S   | rs115230064 | Hetero | Hetero | Hetero |
| ALG12     | 22q13.33 | synonymous SNV | NM_024105:c.A885G:p.A295A      | rs8135963   | Hetero | Hetero | Hetero |
| CRELD2    | 22q13.33 | synonymous SNV | NM_001135101:c.T273C:p.N91N    | rs9616388   | Hetero | Hetero | Hetero |
| CRELD2    | 22q13.33 | synonymous SNV | NM_001135101:c.C600T:p.T200T   | rs7410276   | Hetero | Hetero | Hetero |
| CRELD2    | 22q13.33 | synonymous SNV | NM_024324:c.C1050T:p.R350R     | rs1608      | Hetero | Hetero | Hetero |
| FAM116B   | 22q13.33 | synonymous SNV | NM_001001794:c.C1356G:p.P452P  | rs67248662  | Hetero | Hetero | Hetero |
| KLHDC7B   | 22q13.33 | synonymous SNV | NM_138433:c.C309A:p.G103G      |             | Hetero | Hetero | Hetero |
