# Supplementary material for: TBX1 Mutation Identified by Exome Sequencing in a Japanese Family with 22q11.2 Deletion Syndrome-Like Craniofacial Features and Hypocalcemia
Source: PubMed Central journal article supplement (PMC3956758; doi:10.1371/journal.pone.0091598), 2014-03-17
Supplement: pone.0091598.s006.pdf [file pone.0091598.s006.pdf]

Supplemental Table 4. A list of variants that are present in group 1 and absent from group 2

| Gene                      | Location | Type                   | Substitution                            | dbSNP       | III-5  | II-2   | III-7  |
|---------------------------|----------|------------------------|-----------------------------------------|-------------|--------|--------|--------|
| <Non-synonymous variants> |          |                        |                                         |             |        |        |        |
| PDE4DIP                   | 1q21.1   | nonsynonymous SNV      | NM_001198832: c.C211A: p.L71I           | rs77741369  | Hetero | Hetero | Hetero |
| ANKRD35                   | 1q21.1   | nonsynonymous SNV      | NM_144698: c.G1775A: p.R592Q            | rs41315701  | Hetero | Hetero | Hetero |
| ANKRD35                   | 1q21.1   | nonsynonymous SNV      | NM_144698: c.G1981C: p.E661Q            | rs11579366  | Hetero | Hetero | Hetero |
| MTMR11                    | 1q21.2   | nonsynonymous SNV      | NM_181873: c.A259G: p.M87V              | rs11205303  | Hetero | Hetero | Hetero |
| THEM5                     | 1q21.3   | nonsynonymous SNV      | NM_182578: c.A590G: p.D197G             | rs6587625   | Hetero | Hetero | Hetero |
| RPTN                      | 1q21.3   | nonsynonymous SNV      | NM_001122965: c.A488G: p.K163R          | rs78544048  | Hetero | Hetero | Hetero |
| RPTN                      | 1q21.3   | nonsynonymous SNV      | NM_001122965: c.T481C: p.S161P          | rs76015112  | Hetero | Hetero | Hetero |
| RPTN                      | 1q21.3   | nonsynonymous SNV      | NM_001122965: c.A460G: p.R154G          | rs113327860 | Hetero | Hetero | Hetero |
| HRNR                      | 1q21.3   | nonsynonymous SNV      | NM_001009931: c.T2668C: p.S890P         | rs41266132  | Hetero | Hetero | Hetero |
| S100A3                    | 1q21.3   | nonsynonymous SNV      | NM_002960: c.G8A: p.R3K                 | rs36022742  | Hetero | Hetero | Hetero |
| CREB3L4                   | 1q21.3   | nonsynonymous SNV      | NM_001255978: c.T560C: p.L187P          |             | Hetero | Hetero | Hetero |
| KCNN3                     | 1q21.3   | nonframeshift deletion | NM_001204087: c.I02_110del: p.34_37del  |             | Hetero | Hetero | Hetero |
| PAQR6                     | 1q22     | nonsynonymous SNV      | NM_198406: c.A1024G: p.K342E            |             | Hetero | Hetero | Hetero |
| TTC24                     | 1q23.1   | nonsynonymous SNV      | NM_001105669: c.C1594G: p.P532A         | rs17392348  | Hetero | Hetero | Hetero |
| NES                       | 1q23.1   | nonsynonymous SNV      | NM_006617: c.G2443A: p.V815I            | rs951781    | Hetero | Hetero | Hetero |
| ETV3L                     | 1q23.1   | nonsynonymous SNV      | NM_001004341: c.T55G: p.S19A            | rs16838078  | Hetero | Hetero | Hetero |
| OR10R2                    | 1q23.1   | nonsynonymous SNV      | NM_001004472: c.G571A: p.A191T          | rs3820678   | Hetero | Hetero | Hetero |
| OR10R2                    | 1q23.1   | nonsynonymous SNV      | NM_001004472: c.A647G: p.E216G          | rs6679056   | Hetero | Hetero | Hetero |
| OR10R2                    | 1q23.1   | nonsynonymous SNV      | NM_001004472: c.C715T: p.L239F          | rs1418843   | Hetero | Hetero | Hetero |
| OR10X1                    | 1q23.1   | stopgain SNV           | NM_001004477: c.G198A: p.W66X           | rs863362    | Hetero | Hetero | Hetero |
| OR10X1                    | 1q23.1   | nonsynonymous SNV      | NM_001004477: c.T179C: p.I60T           | rs863363    | Hetero | Hetero | Hetero |
| ATPIA4                    | 1q23.2   | nonsynonymous SNV      | NM_144699: c.T1622G: p.M541R            | rs16831482  | Hetero | Hetero | Hetero |
| VANGL2                    | 1q23.2   | nonsynonymous SNV      | NM_020335: c.G982T: p.A328S             |             | Hetero | Hetero | Hetero |
| CD48                      | 1q23.3   | nonsynonymous SNV      | NM_001256030: c.T205C: p.W69R           | rs143226582 | Hetero | Hetero | Hetero |
| FCRLA                     | 1q23.3   | nonsynonymous SNV      | NM_001184871: c.G392A: p.R131Q          | rs11746     | Hetero | Hetero | Hetero |
| AXDND1                    | 1q25.2   | nonframeshift deletion | NM_144696: c.2960_2962del: p.987_988del | rs141228272 | Hetero | Hetero | Hetero |
| OR2B11                    | 1q44     | frameshift deletion    | NM_001004492: c.23delT: p.F8fs          | rs145122346 | Hetero | Hetero | Hetero |
| OR2T12                    | 1q44     | nonsynonymous SNV      | NM_001004692: c.G888C: p.K296N          | rs11204625  | Hetero | Hetero | Hetero |
| OR14C36                   | 1q44     | nonsynonymous SNV      | NM_001001918: c.A422G: p.Q141R          | rs28448343  | Hetero | Hetero | Hetero |
| OR2T4                     | 1q44     | nonsynonymous SNV      | NM_001004696: c.T178A: p.C60S           | rs28491677  | Hetero | Hetero | Hetero |
| OR2T4                     | 1q44     | nonsynonymous SNV      | NM_001004696: c.C311T: p.A104V          | rs28655275  | Hetero | Hetero | Hetero |
| OR2T4                     | 1q44     | nonsynonymous SNV      | NM_001004696: c.T403C: p.F135L          | rs28637620  | Hetero | Hetero | Hetero |
| OR2T4                     | 1q44     | frameshift insertion   | NM_001004696: c.446_447insTA: p.T149fs  | rs61248663  | Hetero | Hetero | Hetero |
| OR2T4                     | 1q44     | nonsynonymous SNV      | NM_001004696: c.A448G: p.M150V          | rs56721857  | Hetero | Hetero | Hetero |
| OR2T4                     | 1q44     | nonsynonymous SNV      | NM_001004696: c.G775A: p.G259R          | rs28718027  | Hetero | Hetero | Hetero |
| OR2T4                     | 1q44     | nonsynonymous SNV      | NM_001004696: c.C898T: p.P300S          | rs28698997  | Hetero | Hetero | Hetero |
| OR2T11                    | 1q44     | nonsynonymous SNV      | NM_001001964: c.A926G: p.Q309R          | rs1892442   | Homo   | Homo   | Homo   |
| OR2T11                    | 1q44     | nonsynonymous SNV      | NM_001001964: c.T355C: p.C119R          | rs1892443   | Homo   | Homo   | Homo   |
| OR14I1                    | 1q44     | nonsynonymous SNV      | NM_001004734: c.G509A: p.S170N          | rs2000390   | Hetero | Hetero | Hetero |
| OR14I1                    | 1q44     | nonsynonymous SNV      | NM_001004734: c.G148A: p.D50N           | rs4509608   | Hetero | Hetero | Hetero |
| CNTNAP5                   | 2q14.3   | nonsynonymous SNV      | NM_130773: c.G2711T: p.G904V            | rs192435252 | Hetero | Hetero | Hetero |
| GPR55                     | 2q37.1   | nonsynonymous SNV      | NM_005683: c.G584T: p.G195V             | rs3749073   | Hetero | Hetero | Hetero |
| ALPP                      | 2q37.1   | nonsynonymous SNV      | NM_001632: c.C74T: p.P25L               | rs1130335   | Hetero | Hetero | Hetero |
| ALPP                      | 2q37.1   | nonsynonymous SNV      | NM_001632: c.G788A: p.R263H             | rs2653378   | Hetero | Hetero | Hetero |
| ALPPL2                    | 2q37.1   | nonsynonymous SNV      | NM_031313: c.C1492A: p.R498S            | rs58080708  | Hetero | Hetero | Hetero |
| GRM7                      | 3p26.1   | nonsynonymous SNV      | NM_000844: c.A1298T: p.Y433F            | rs2229902   | Hetero | Hetero | Hetero |
| NUP210                    | 3p25.1   | nonsynonymous SNV      | NM_024923: c.G889A: p.A297T             | rs7628051   | Hetero | Hetero | Hetero |
| ROBO1                     | 3p12.3   | nonsynonymous SNV      | NM_001145845: c.G4505A: p.S1502N        | rs149473563 | Hetero | Hetero | Hetero |
| GBE1                      | 3p12.2   | nonsynonymous SNV      | NM_000158: c.A1519G: p.T507A            | rs2228389   | Hetero | Hetero | Hetero |
| RETNLB                    | 3q13.13  | nonsynonymous SNV      | NM_032579: c.C59T: p.P20L               | rs11708527  | Hetero | Hetero | Hetero |
| GUCA1C                    | 3q13.13  | nonsynonymous SNV      | NM_005459: c.A253G: p.M85V              | rs6804162   | Homo   | Hetero | Homo   |
| GUCA1C                    | 3q13.13  | nonsynonymous SNV      | NM_005459: c.G214A: p.V72I              | rs2715687   | Homo   | Hetero | Homo   |
| PHLDB2                    | 3q13.2   | nonsynonymous SNV      | NM_145753: c.C2692T: p.P898S            | rs3749298   | Hetero | Hetero | Hetero |
| BOC                       | 3q13.2   | nonsynonymous SNV      | NM_033254: c.C664T: p.R222C             |             | Hetero | Hetero | Hetero |
| WDR52                     | 3q13.2   | nonsynonymous SNV      | NM_001164496: c.A3861C: p.K1287N        | rs6768642   | Hetero | Hetero | Hetero |
| WDR52                     | 3q13.2   | nonsynonymous SNV      | NM_001164496: c.C2234T: p.P745L         | rs58988763  | Hetero | Hetero | Hetero |
| WDR52                     | 3q13.2   | nonsynonymous SNV      | NM_001164496: c.G852T: p.K284N          | rs16845107  | Hetero | Hetero | Hetero |
| SPICE1                    | 3q13.2   | nonsynonymous SNV      | NM_144718: c.C823G: p.L275V             | rs16861032  | Hetero | Hetero | Hetero |
| POLQ                      | 3q13.33  | nonsynonymous SNV      | NM_199420: c.A3602G: p.H1201R           | rs3218651   | Hetero | Hetero | Hetero |
| POLQ                      | 3q13.33  | nonsynonymous SNV      | NM_199420: c.A2884G: p.S962G            | rs3218636   | Hetero | Hetero | Hetero |
| IQCB1                     | 3q13.33  | nonsynonymous SNV      | NM_001023571: c.G902A: p.C301Y          | rs17849995  | Hetero | Hetero | Hetero |
| ILDR1                     | 3q13.33  | nonsynonymous SNV      | NM_001199800: c.C524G: p.P175R          | rs3915061   | Hetero | Hetero | Hetero |
| PARP15                    | 3q21.1   | nonsynonymous SNV      | NM_001113523: c.G124A: p.V42M           | rs1875272   | Hetero | Hetero | Hetero |
| SEMA5B                    | 3q21.1   | nonsynonymous SNV      | NM_001031702: c.C1148G: p.A383G         | rs78693594  | Hetero | Hetero | Hetero |
| TNK2                      | 3q29     | nonsynonymous SNV      | NM_005781: c.G2630A: p.R877H            | rs112384084 | Hetero | Hetero | Hetero |
| PIGX                      | 3q29     | nonsynonymous SNV      | NM_001166304: c.C464T: p.P155L          | rs2291397   | Homo   | Hetero | Hetero |
| FYTTD1                    | 3q29     | nonsynonymous SNV      | NM_001011537: c.C7G: p.P3A              | rs7624719   | Hetero | Homo   | Hetero |
| LRCH3                     | 3q29     | nonsynonymous SNV      | NM_032773: c.C1565T: p.P522L            | rs36078463  | Hetero | Hetero | Hetero |

|              |          |                         |                                               |             |        |        |        |
|--------------|----------|-------------------------|-----------------------------------------------|-------------|--------|--------|--------|
| IQCG         | 3q29     | nonsynonymous SNV       | NM_001134435: c.G529C: p.D177H                | rs67877771  | Hetero | Hetero | Hetero |
| IQCG         | 3q29     | nonsynonymous SNV       | NM_001134435: c.C335A: p.A112D                | rs9880989   | Hetero | Hetero | Hetero |
| NEIL3        | 4q34.3   | nonsynonymous SNV       | NM_018248: c.A857G: p.H286R                   | rs34193982  | Hetero | Hetero | Hetero |
| GFPT2        | 5q35.3   | nonsynonymous SNV       | NM_005110: c.A1411G: p.I471V                  | rs2303007   | Homo   | Hetero | Hetero |
| CASP8AP2     | 6q15     | nonsynonymous SNV       | NM_001137667: c.C4975T: p.P1659S              | rs3799896   | Hetero | Hetero | Hetero |
| KLHL32       | 6q16.1   | nonsynonymous SNV       | NM_052904: c.A386G: p.N129S                   | rs2294763   | Hetero | Hetero | Hetero |
| PRDM1        | 6q21     | nonsynonymous SNV       | NM_001198: c.G220A: p.G74S                    | rs2185379   | Hetero | Hetero | Hetero |
| ARMC2        | 6q21     | nonsynonymous SNV       | NM_032131: c.T497C: p.M166T                   | rs9386758   | Hetero | Hetero | Hetero |
| AKD1         | 6q21     | nonsynonymous SNV       | NM_001145128: c.C2443T: p.P815S               | rs10499052  | Hetero | Hetero | Hetero |
| AKD1         | 6q21     | nonframeshift deletion  | NM_001145128: c.2108_2110del: p.703_704del    | rs72285221  | Homo   | Hetero | Hetero |
| MARCKS       | 6q21     | nonsynonymous SNV       | NM_002356: c.C821T: p.A274V                   | rs3734458   | Hetero | Hetero | Hetero |
| C6orf170     | 6q22.31  | nonsynonymous SNV       | NM_152730: c.A1795G: p.I599V                  | rs7745023   | Hetero | Hetero | Hetero |
| NCOA7        | 6q22.32  | nonsynonymous SNV       | NM_001199622: c.T657G: p.D219E                | rs1567      | Hetero | Hetero | Hetero |
| LAMA2        | 6q22.33  | nonsynonymous SNV       | NM_000426: c.G1856A: p.R619H                  | rs3816665   | Hetero | Hetero | Hetero |
| TAAR2        | 6q23.2   | stopgain SNV            | NM_014626: c.G368A: p.W123X                   | rs8192646   | Hetero | Hetero | Hetero |
| VNN1         | 6q23.2   | nonsynonymous SNV       | NM_004666: c.G436A: p.D146N                   | rs45624336  | Hetero | Hetero | Hetero |
| AHI1         | 6q23.3   | nonsynonymous SNV       | NM_001134830: c.A3257G: p.E1086G              | rs148000791 | Hetero | Hetero | Hetero |
| MAP3K5       | 6q23.3   | nonsynonymous SNV       | NM_005923: c.A3748G: p.I1250V                 | rs35551087  | Hetero | Hetero | Hetero |
| CCDC28A      | 6q24.1   | nonsynonymous SNV       | NM_015439: c.C245T: p.P82L                    | rs2273510   | Hetero | Hetero | Hetero |
| PHACTR2      | 6q24.2   | nonsynonymous SNV       | NM_001100165: c.G862A: p.V288I                | rs186432598 | Hetero | Hetero | Hetero |
| PPP1R3A      | 7q31.1   | nonsynonymous SNV       | NM_002711: c.G2649T: p.R883S                  | rs1800000   | Hetero | Hetero | Hetero |
| WNT2         | 7q31.2   | nonsynonymous SNV       | NM_000391: c.G211A: p.E71K                    | rs116850179 | Hetero | Hetero | Hetero |
| PTPRZ1       | 7q31.32  | nonsynonymous SNV       | NM_001206838: c.T8G: p.I3S                    | rs740965    | Hetero | Hetero | Hetero |
| PTPRZ1       | 7q31.32  | nonframeshift deletion  | NM_002851: c.4275_4277del: p.1425_1426del     | rs35947407  | Hetero | Hetero | Hetero |
| PTPRZ1       | 7q31.32  | nonsynonymous SNV       | NM_002851: c.G4298A: p.G1433D                 | rs1147504   | Hetero | Hetero | Hetero |
| FAM71F1      | 7q32.1   | nonsynonymous SNV       | NM_032599: c.G724A: p.E242K                   | rs6971091   | Hetero | Hetero | Hetero |
| RP1L1        | 8p23.1   | nonframeshift insertion | NM_178857: c.3979_3980insGAA: p.T1327delinsET |             | Hetero | Hetero | Hetero |
| PREX2        | 8q13.2   | nonsynonymous SNV       | NM_024870: c.C4463T: p.S1488L                 | rs61753704  | Homo   | Hetero | Hetero |
| C9orf66      | 9p24.3   | nonsynonymous SNV       | NM_152569: c.T593C: p.V198A                   | rs76707254  | Hetero | Hetero | Hetero |
| C9orf66      | 9p24.3   | nonsynonymous SNV       | NM_152569: c.G533A: p.R178Q                   | rs2236547   | Hetero | Hetero | Hetero |
| GOLM1        | 9q21.33  | nonsynonymous SNV       | NM_016548: c.A650G: p.H217R                   | rs2297002   | Hetero | Hetero | Hetero |
| ABCA1        | 9q31.1   | nonsynonymous SNV       | NM_005502: c.G2473A: p.V825I                  | rs2066715   | Hetero | Hetero | Hetero |
| ABCA1        | 9q31.1   | nonsynonymous SNV       | NM_005502: c.G656A: p.R219K                   | rs2230806   | Hetero | Hetero | Hetero |
| CTNNA1       | 9q31.3   | nonsynonymous SNV       | NM_003798: c.G1579C: p.E527Q                  | rs7021366   | Hetero | Hetero | Hetero |
| C9orf5       | 9q31.3   | nonsynonymous SNV       | NM_032012: c.A338G: p.H113R                   | rs1051474   | Hetero | Hetero | Hetero |
| C9orf5       | 9q31.3   | nonsynonymous SNV       | NM_032012: c.C27G: p.D9E                      | rs12001627  | Hetero | Hetero | Hetero |
| PALM2-AKAP2  | 9q31.3   | nonframeshift insertion | NM_001004065: c.2091_2092insGAAGCT:           |             | Hetero | Hetero | Hetero |
| SVEP1        | 9q31.3   | nonsynonymous SNV       | NM_153366: c.C10676T: p.T3559M                | rs17204533  | Hetero | Hetero | Hetero |
| GNG10        | 9q31.3   | nonsynonymous SNV       | NM_001017998: c.G10A: p.G4R                   | rs187667042 | Hetero | Hetero | Hetero |
| C9orf84      | 9q31.3   | nonsynonymous SNV       | NM_001080551: c.T2310G: p.N770K               | rs7036568   | Hetero | Hetero | Hetero |
| C9orf84      | 9q31.3   | nonsynonymous SNV       | NM_001080551: c.A2083T: p.M695L               | rs11791445  | Hetero | Hetero | Hetero |
| LOC100505478 | 9q32     | nonsynonymous SNV       | NM_001199233: c.A326G: p.H109R                | rs1055207   | Hetero | Hetero | Hetero |
| LOC100505478 | 9q32     | nonsynonymous SNV       | NM_001199233: c.T134A: p.L45Q                 | rs1359992   | Hetero | Hetero | Hetero |
| GPSM1        | 9q34.3   | stopgain SNV            | NM_015597: c.C1283A: p.S428X                  | rs59873903  | Hetero | Hetero | Hetero |
| GPSM1        | 9q34.3   | nonsynonymous SNV       | NM_015597: c.G1363C: p.A455P                  | rs78403475  | Hetero | Hetero | Hetero |
| C10orf111    | 10p13    | nonsynonymous SNV       | NM_153244: c.G209A: p.R70K                    | rs7896053   | Hetero | Hetero | Hetero |
| RPP38        | 10p13    | nonsynonymous SNV       | NM_006414: c.A256G: p.I86V                    | rs3814171   | Hetero | Hetero | Hetero |
| RPP38        | 10p13    | nonsynonymous SNV       | NM_006414: c.C542G: p.A181G                   | rs15772     | Hetero | Hetero | Hetero |
| RPP38        | 10p13    | nonsynonymous SNV       | NM_006414: c.C748G: p.R250G                   | rs34040166  | Hetero | Hetero | Hetero |
| CUBN         | 10p13    | nonsynonymous SNV       | NM_001081: c.C10656A: p.N3552K                | rs1801232   | Hetero | Hetero | Hetero |
| CUBN         | 10p13    | nonsynonymous SNV       | NM_001081: c.C4675T: p.P1559S                 | rs1801231   | Hetero | Hetero | Hetero |
| C10orf140    | 10p12.31 | nonsynonymous SNV       | NM_207371: c.T1712A: p.I571N                  | rs76875707  | Hetero | Hetero | Hetero |
| MSRB2        | 10p12.2  | nonsynonymous SNV       | NM_012228: c.A137G: p.E46G                    | rs2296466   | Hetero | Hetero | Hetero |
| GAD2         | 10p12.1  | nonsynonymous SNV       | NM_000818: c.T683C: p.I228T                   | rs143186590 | Hetero | Hetero | Hetero |
| LRRTM3       | 10q21.3  | nonsynonymous SNV       | NM_178011: c.T1589G: p.I530R                  | rs75363119  | Hetero | Hetero | Hetero |
| NEUROG3      | 10q22.1  | nonsynonymous SNV       | NM_020999: c.T596C: p.F199S                   | rs4536103   | Hetero | Hetero | Hetero |
| ADAMTS14     | 10q22.1  | nonsynonymous SNV       | NM_080722: c.C2809A: p.L937M                  | rs12774070  | Hetero | Hetero | Hetero |
| ADAMTS14     | 10q22.1  | nonsynonymous SNV       | NM_080722: c.C3322T: p.P1108S                 | rs61573157  | Hetero | Hetero | Hetero |
| MUC2         | 11p15.5  | nonsynonymous SNV       | NM_002457: c.A4579C: p.T1527P                 | rs77094665  | Homo   | Hetero | Homo   |
| HTR3B        | 11q23.2  | nonsynonymous SNV       | NM_006028: c.A386C: p.Y129S                   | rs1176744   | Hetero | Hetero | Hetero |
| WNK1         | 12p13.33 | nonsynonymous SNV       | NM_001184985: c.C1994T: p.T665I               | rs2286007   | Hetero | Hetero | Hetero |
| WNK1         | 12p13.33 | nonsynonymous SNV       | NM_014823: c.G4683T: p.M1561I                 | rs12828016  | Hetero | Hetero | Hetero |
| TMEM106C     | 12q13.11 | nonsynonymous SNV       | NM_001143842: c.C524T: p.S175F                | rs2286025   | Hetero | Hetero | Hetero |
| DDN          | 12q13.12 | nonsynonymous SNV       | NM_015086: c.A1982G: p.E661G                  | rs10783299  | Hetero | Hetero | Hetero |
| MLL2         | 12q13.12 | nonsynonymous SNV       | NM_003482: c.C7144T: p.P2382S                 | rs3741626   | Hetero | Hetero | Hetero |
| NCKAP5L      | 12q13.12 | nonsynonymous SNV       | NM_001037806: c.T2041C: p.S681P               | rs3813526   | Hetero | Hetero | Hetero |
| NCKAP5L      | 12q13.12 | nonsynonymous SNV       | NM_001037806: c.T976A: p.L326M                | rs3741554   | Hetero | Hetero | Hetero |
| BCDIN3D      | 12q13.12 | nonsynonymous SNV       | NM_181708: c.T864A: p.S288R                   | rs11169172  | Hetero | Hetero | Hetero |
| FAM186A      | 12q13.12 | nonsynonymous SNV       | NM_001145475: c.C6684G: p.H2228Q              | rs6580741   | Hetero | Hetero | Hetero |
| IKBIP        | 12q23.1  | nonsynonymous SNV       | NM_153687: c.A340C: p.M114L                   |             | Hetero | Hetero | Hetero |
| MYBPC1       | 12q23.2  | nonsynonymous SNV       | NM_001254722: c.C1365G: p.H455Q               | rs3817552   | Hetero | Hetero | Hetero |

|           |          |                         |                                              |             |        |        |        |
|-----------|----------|-------------------------|----------------------------------------------|-------------|--------|--------|--------|
| BTBD11    | 12q23.3  | nonsynonymous SNV       | NM_001018072: c.G1342A: p.G448S              | rs1558781   | Hetero | Hetero | Hetero |
| SART3     | 12q23.3  | nonsynonymous SNV       | NM_014706: c.C69G: p.D23E                    | rs2072579   | Hetero | Hetero | Hetero |
| RPH3A     | 12q24.13 | nonsynonymous SNV       | NM_014954: c.G867T: p.Q289H                  | rs2189473   | Hetero | Hetero | Hetero |
| NOS1      | 12q24.22 | nonsynonymous SNV       | NM_001204218: c.C2557T: p.P853S              | rs11068428  | Hetero | Hetero | Hetero |
| TAOK3     | 12q24.23 | nonsynonymous SNV       | NM_016281: c.G140A: p.S47N                   | rs428073    | Hetero | Hetero | Hetero |
| OASL      | 12q24.31 | nonsynonymous SNV       | NM_003733: c.G381C: p.R127S                  |             | Hetero | Hetero | Hetero |
| WDR66     | 12q24.31 | nonsynonymous SNV       | NM_001178003: c.C1148T: p.T383M              | rs34768683  | Hetero | Hetero | Hetero |
| WDR66     | 12q24.31 | nonsynonymous SNV       | NM_001178003: c.C1333T: p.L445F              | rs11043265  | Hetero | Hetero | Hetero |
| EP400     | 12q24.33 | nonsynonymous SNV       | NM_015409: c.C2494G: p.R832G                 |             | Hetero | Hetero | Hetero |
| FBRSL1    | 12q24.33 | nonsynonymous SNV       | NM_001142641: c.C2507T: p.A836V              | rs11550079  | Homo   | Hetero | Homo   |
| GOLGA3    | 12q24.33 | nonsynonymous SNV       | NM_001172557: c.C791T: p.P264L               | rs3741486   | Hetero | Hetero | Hetero |
| ZNF268    | 12q24.33 | nonsynonymous SNV       | NM_001165887: c.A220T: p.M74L                | rs61960670  | Hetero | Hetero | Hetero |
| ZNF268    | 12q24.33 | nonsynonymous SNV       | NM_001165881: c.G2579C: p.R860T              | rs62644541  | Hetero | Hetero | Hetero |
| LOC647589 | 12q24.33 | nonsynonymous SNV       | NM_001191054: c.C689G: p.S230C               | rs36146434  | Hetero | Hetero | Hetero |
| USPL1     | 13q12.3  | nonsynonymous SNV       | NM_005800: c.T1592C: p.L531S                 | rs7984952   | Hetero | Hetero | Hetero |
| USPL1     | 13q12.3  | nonsynonymous SNV       | NM_005800: c.G2849A: p.S950N                 | rs3742302   | Hetero | Hetero | Hetero |
| BRCA2     | 13q13.1  | nonsynonymous SNV       | NM_000059: c.A865C: p.N289H                  | rs766173    | Hetero | Hetero | Hetero |
| BRCA2     | 13q13.1  | nonsynonymous SNV       | NM_000059: c.A2971G: p.N991D                 | rs1799944   | Hetero | Hetero | Hetero |
| SOHLH2    | 13q13.3  | nonsynonymous SNV       | NM_017826: c.G1015A: p.A339T                 | rs2296968   | Homo   | Hetero | Hetero |
| EXOSC8    | 13q13.3  | nonsynonymous SNV       | NM_181503: c.C272T: p.S91L                   | rs140108815 | Hetero | Hetero | Hetero |
| DGKH      | 13q14.11 | nonsynonymous SNV       | NM_001204506: c.T3194C: p.V1065A             | rs17646069  | Homo   | Hetero | Hetero |
| AKAP11    | 13q14.11 | nonsynonymous SNV       | NM_016248: c.G3245T: p.G1082V                | rs150773395 | Hetero | Hetero | Hetero |
| EPSTI1    | 13q14.11 | frameshift insertion    | NM_001002264: c.1185_1186insCCTGA: p.E395fs  | rs111313375 | Hetero | Hetero | Hetero |
| EPSTI1    | 13q14.11 | nonsynonymous SNV       | NM_001002264: c.G949A: p.G317S               | rs79111014  | Hetero | Hetero | Hetero |
| ABCC4     | 13q32.1  | nonsynonymous SNV       | NM_005845: c.G2578A: p.V860M                 | rs45477596  | Hetero | Hetero | Hetero |
| ABCC4     | 13q32.1  | nonsynonymous SNV       | NM_001105515: c.G559T: p.G187W               | rs11568658  | Hetero | Hetero | Hetero |
| UGGT2     | 13q32.1  | nonsynonymous SNV       | NM_020121: c.A2980C: p.M994L                 | rs12876018  | Hetero | Hetero | Hetero |
| CCDC168   | 13q33.1  | nonsynonymous SNV       | NM_001146197: c.G14677A: p.G4893S            | rs9518825   | Hetero | Hetero | Hetero |
| CCDC168   | 13q33.1  | nonsynonymous SNV       | NM_001146197: c.A5110C: p.N1704H             | rs9300759   | Hetero | Hetero | Hetero |
| KDELC1    | 13q33.1  | nonsynonymous SNV       | NM_024089: c.A340G: p.I114V                  | rs1047740   | Hetero | Hetero | Hetero |
| WDR20     | 14q32.31 | nonsynonymous SNV       | NM_001242415: c.G577A: p.D193N               |             | Hetero | Hetero | Hetero |
| CINP      | 14q32.31 | nonsynonymous SNV       | NM_001177611: c.G536A: p.R179H               | rs7011      | Hetero | Hetero | Hetero |
| TDRD9     | 14q32.33 | nonsynonymous SNV       | NM_153046: c.T3833G: p.F1278C                | rs2273841   | Hetero | Hetero | Hetero |
| ZMEM179   | 14q32.33 | nonsynonymous SNV       | NM_207379: c.T217C: p.F73L                   |             | Hetero | Hetero | Hetero |
| TBTB42    | 14q32.33 | nonsynonymous SNV       | NM_001137601: c.G694A: p.E232K               | rs4983387   | Hetero | Hetero | Hetero |
| LRRK1     | 15q26.3  | nonsynonymous SNV       | NM_024652: c.A607G: p.K203E                  | rs35985016  | Hetero | Hetero | Hetero |
| TARSL2    | 15q26.3  | nonsynonymous SNV       | NM_152334: c.C287G: p.A96G                   | rs1143138   | Hetero | Hetero | Hetero |
| CDH3      | 16q22.1  | nonsynonymous SNV       | NM_001793: c.G1689C: p.Q563H                 | rs1126933   | Homo   | Hetero | Hetero |
| IST1      | 16q22.2  | nonframeshift deletion  | NM_014761: c.688_693del: p.230_231del        | rs148848854 | Homo   | Hetero | Hetero |
| CNTNAP4   | 16q23.1  | nonsynonymous SNV       | NM_138994: c.T3246G: p.D1082E                | rs7202925   | Hetero | Hetero | Hetero |
| SYCE1L    | 16q23.1  | nonsynonymous SNV       | NM_001129979: c.G533A: p.R178Q               | rs13331769  | Hetero | Hetero | Hetero |
| SYCE1L    | 16q23.1  | nonsynonymous SNV       | NM_001129979: c.G28A: p.P210T                | rs62049594  | Hetero | Hetero | Hetero |
| WWOX      | 16q23.1  | nonsynonymous SNV       | NM_130791: c.A544G: p.K182E                  | rs77067228  | Hetero | Hetero | Hetero |
| WWOX      | 16q23.1  | nonsynonymous SNV       | NM_016373: c.G535A: p.A179T                  | rs12918952  | Hetero | Hetero | Hetero |
| GP1BA     | 17p13.2  | frameshift deletion     | NM_000173: c.1285delG: p.E429fs              |             | Homo   | Homo   | Homo   |
| CDRT15    | 17p12    | nonsynonymous SNV       | NM_001007530: c.T260G: p.L87R,               | rs4791565   | G/G    | G/A    | G/G    |
| CDRT4     | 17p12    | nonsynonymous SNV       | NM_001204477: c.T366G: p.H122Q               | rs2954759   | Hetero | Hetero | Hetero |
| SMCR8     | 17p11.2  | nonsynonymous SNV       | NM_144775: c.G1667A: p.R556H                 | rs1563632   | Hetero | Hetero | Hetero |
| SLC13A2   | 17q11.2  | nonsynonymous SNV       | NM_001145976: c.A1519G: p.I507V              | rs11567842  | Hetero | Hetero | Hetero |
| SLFN11    | 17q12    | nonsynonymous SNV       | NM_152270: c.G1466T: p.R489L                 | rs9898983   | Hetero | Hetero | Hetero |
| KRT10     | 17q21.2  | nonsynonymous SNV       | NM_000421: c.C1459T: p.H487Y                 | rs17855579  | Hetero | Hetero | Homo   |
| MTMR4     | 17q22    | nonsynonymous SNV       | NM_004687: c.A838G: p.S280G                  | rs2302190   | Homo   | Hetero | Hetero |
| TEX14     | 17q22    | nonsynonymous SNV       | NM_001201457: c.G3263A: p.G1088D             | rs6503870   | Homo   | Hetero | Hetero |
| PPM1E     | 17q22    | nonframeshift insertion | NM_014906: c.99_100insGAACCC: p.P33delinsPEP |             | Homo   | Hetero | Hetero |
| NOL11     | 17q24.2  | nonsynonymous SNV       | NM_015462: c.T344C: p.V115A                  | rs2291284   | Homo   | Hetero | Hetero |
| C17orf80  | 17q25.1  | nonsynonymous SNV       | NM_001100621: c.T1066C: p.F356L              | rs745143    | Homo   | Hetero | Hetero |
| C17orf80  | 17q25.1  | nonsynonymous SNV       | NM_001100621: c.T1186C: p.C396R              | rs904383    | Homo   | Hetero | Hetero |
| C17orf80  | 17q25.1  | nonsynonymous SNV       | NM_001100621: c.G1260C: p.Q420H              | rs745142    | Homo   | Hetero | Hetero |
| C17orf80  | 17q25.1  | nonsynonymous SNV       | NM_001100622: c.G1564A: p.A522T              | rs1566286   | Homo   | Hetero | Hetero |
| ENPP7     | 17q25.3  | nonsynonymous SNV       | NM_178543: c.T11C: p.L4P                     | rs8074547   | Homo   | Homo   | Hetero |
| METTL4    | 18p11.32 | nonsynonymous SNV       | NM_022840: c.C928A: p.Q310K                  | rs2677879   | Hetero | Hetero | Hetero |
| SMCHD1    | 18p11.32 | nonsynonymous SNV       | NM_015295: c.A2637T: p.K879N                 | rs633422    | Hetero | Hetero | Hetero |
| TMEM200C  | 18p11.31 | nonframeshift deletion  | NM_001080209: c.676_690del: p.226_230del     |             | Hetero | Hetero | Hetero |
| LAMA1     | 18p11.31 | nonsynonymous SNV       | NM_005559: c.C6883T: p.R2295C                | rs76842111  | Hetero | Hetero | Hetero |
| LAMA1     | 18p11.31 | nonsynonymous SNV       | NM_005559: c.C3163T: p.R1055W                | rs140681784 | Hetero | Hetero | Hetero |
| CCDC165   | 18p11.22 | nonsynonymous SNV       | NM_015210: c.A1613G: p.D538G                 | rs3744979   | Hetero | Hetero | Hetero |
| PIEZO2    | 18p11.22 | nonsynonymous SNV       | NM_022068: c.G3443T: p.C1148F                | rs35033671  | Hetero | Hetero | Hetero |
| CEP76     | 18p11.21 | nonsynonymous SNV       | NM_024899: c.G1327T: p.V443F                 |             | Hetero | Hetero | Hetero |
| LAMA3     | 18q11.2  | nonsynonymous SNV       | NM_001127718: c.C3450A: p.N1150K             | rs1154232   | Hetero | Hetero | Hetero |
| COL5A3    | 19p13.2  | nonsynonymous SNV       | NM_015719: c.G4462C: p.A1488P                | rs3745584   | Hetero | Hetero | Hetero |
| NWD1      | 19p13.11 | nonsynonymous SNV       | NM_001007525: c.C163T: p.R55W                | rs139873139 | Hetero | Hetero | Hetero |

|                       |          |                   |                                  |             |        |        |        |
|-----------------------|----------|-------------------|----------------------------------|-------------|--------|--------|--------|
| KIAA1683              | 19p13.11 | nonsynonymous SNV | NM_001145304: c.C3284A: p.P1095H | rs999813    | Hetero | Hetero | Hetero |
| KIAA1683              | 19p13.11 | nonsynonymous SNV | NM_001145304: c.A1943T: p.Y648F  | rs8110972   | Hetero | Hetero | Hetero |
| KIAA1683              | 19p13.11 | nonsynonymous SNV | NM_001145304: c.A1828C: p.T610P  | rs2277922   | Hetero | Hetero | Hetero |
| KIAA1683              | 19p13.11 | nonsynonymous SNV | NM_001145304: c.T1076C: p.M359T  | rs3746186   | Hetero | Hetero | Hetero |
| KIAA1683              | 19p13.11 | nonsynonymous SNV | NM_001145304: c.G854C: p.S285T   | rs8104533   | Hetero | Hetero | Hetero |
| KIAA1683              | 19p13.11 | nonsynonymous SNV | NM_001145304: c.C703G: p.L235V   | rs8103906   | Hetero | Hetero | Hetero |
| KIAA1683              | 19p13.11 | nonsynonymous SNV | NM_001145304: c.T131C: p.L44P    | rs1469023   | Hetero | Hetero | Hetero |
| NCAN                  | 19p13.11 | nonsynonymous SNV | NM_004386: c.G2513A: p.S838N     | rs10426537  | Hetero | Hetero | Hetero |
| URI1                  | 19q12    | nonsynonymous SNV | NM_003796: c.C82G: p.P28A        |             | Hetero | Hetero | Hetero |
| PSMF1                 | 20p13    | nonsynonymous SNV | NM_006814: c.A521G: p.H174R      | rs2235587   | Hetero | Hetero | Homo   |
| SIRPB1                | 20p13    | nonsynonymous SNV | NM_001135844: c.C316A: p.R106S   | rs1135201   | Homo   | Homo   | Homo   |
| SIRPB1                | 20p13    | nonsynonymous SNV | NM_001135844: c.C297A: p.N99K    | rs149722469 | Homo   | Homo   | Homo   |
| SIRPB1                | 20p13    | nonsynonymous SNV | NM_001135844: c.A295G: p.N99D    | rs141518677 | Homo   | Homo   | Homo   |
| SIRPB1                | 20p13    | nonsynonymous SNV | NM_001135844: c.T284C: p.L95P    |             | Homo   | Homo   | Homo   |
| SIRPB1                | 20p13    | nonsynonymous SNV | NM_001135844: c.C282G: p.D94E    | rs1135200   | Homo   | Homo   | Homo   |
| OGFR                  | 20q13.33 | nonsynonymous SNV | NM_007346: c.G1670C: p.S557T     | rs78981100  | Hetero | Hetero | Hetero |
| RFPL3                 | 22q12.3  | nonsynonymous SNV | NM_001098535: c.T248C: p.M83T    | rs16987625  | Hetero | Hetero | Hetero |
| BPIFC                 | 22q12.3  | nonsynonymous SNV | NM_174932: c.T1351C: p.S451P     | rs5998478   | Hetero | Hetero | Hetero |
| HMGXB4                | 22q12.3  | nonsynonymous SNV | NM_001003681: c.G494T: p.G165V   | rs1053593   | Hetero | Hetero | Hetero |
| FAM116B               | 22q13.33 | nonsynonymous SNV | NM_001001794: c.G1207A: p.V403M  | rs68178377  | Hetero | Hetero | Hetero |
| SPANXD/E              | Xq27.2   | nonsynonymous SNV | NM_032417: c.G202C: p.V68L       | rs5953618   | Hetero | Hetero | Hetero |
| <Synonymous variants> |          |                   |                                  |             |        |        |        |
| SLC22A15              | 1p13.1   | synonymous SNV    | NM_018420: c.C288T: p.S96S       | rs4046190   | Hetero | Hetero | Hetero |
| SPAG17                | 1p12     | synonymous SNV    | NM_206996: c.A264G: p.S88S       | rs1935992   | Hetero | Hetero | Hetero |
| NOTCH2                | 1p12     | synonymous SNV    | NM_001200001: c.G1557A: p.L519L  | rs141161410 | Hetero | Hetero | Hetero |
| PDE4DIP               | 1q21.1   | synonymous SNV    | NM_001198834: c.C4773T: p.S1591S | rs111839403 | Hetero | Hetero | Hetero |
| LIX1L                 | 1q21.1   | synonymous SNV    | NM_153713: c.T99C: p.A33A        | rs2282013   | Hetero | Hetero | Hetero |
| PI4KB                 | 1q21.3   | synonymous SNV    | NM_001198774: c.C786T: p.D262D   | rs1056847   | Hetero | Hetero | Hetero |
| PSMB4                 | 1q21.3   | synonymous SNV    | NM_002796: c.G75A: p.P25P        | rs7172      | Hetero | Hetero | Hetero |
| THEM5                 | 1q21.3   | synonymous SNV    | NM_182578: c.C51A: p.G17G        | rs7556386   | Hetero | Hetero | Hetero |
| TCHH                  | 1q21.3   | synonymous SNV    | NM_007113: c.C4971T: p.R1657R    | rs190389251 | Hetero | Hetero | Hetero |
| LCE1E                 | 1q21.3   | synonymous SNV    | NM_178353: c.A216T: p.G72G       | rs138092045 | Hetero | Hetero | Hetero |
| S100A5                | 1q21.3   | synonymous SNV    | NM_002962: c.T159C: p.D53D       | rs2248745   | Hetero | Hetero | Hetero |
| S100A4                | 1q21.3   | synonymous SNV    | NM_002961: c.A99G: p.E33E        | rs1050923   | Hetero | Hetero | Hetero |
| S100A3                | 1q21.3   | synonymous SNV    | NM_002960: c.C261T: p.H87H       | rs41265164  | Hetero | Hetero | Hetero |
| S100A16               | 1q21.3   | synonymous SNV    | NM_080388: c.G153A: p.S51S       |             | Hetero | Hetero | Hetero |
| ETV3L                 | 1q23.1   | synonymous SNV    | NM_001004341: c.C831A: p.L277L   | rs1176537   | Hetero | Hetero | Hetero |
| ETV3L                 | 1q23.1   | synonymous SNV    | NM_001004341: c.T75C: p.D25D     | rs16838075  | Hetero | Hetero | Hetero |
| OR10K2                | 1q23.1   | synonymous SNV    | NM_001004476: c.A405C: p.L135L   | rs12239443  | Hetero | Hetero | Hetero |
| OR10K2                | 1q23.1   | synonymous SNV    | NM_001004476: c.C156T: p.D52D    | rs34616883  | Hetero | Hetero | Hetero |
| OR6P1                 | 1q23.1   | synonymous SNV    | NM_001160325: c.T255C: p.F85F    | rs12080815  | Hetero | Hetero | Hetero |
| OR6P1                 | 1q23.1   | synonymous SNV    | NM_001160325: c.T171C: p.R57R    | rs12081915  | Hetero | Hetero | Hetero |
| OR10X1                | 1q23.1   | synonymous SNV    | NM_001004477: c.C426T: p.I142I   | rs863360    | Hetero | Hetero | Hetero |
| OR10X1                | 1q23.1   | synonymous SNV    | NM_001004477: c.G270A: p.T90T    | rs863361    | Hetero | Hetero | Hetero |
| IGSF8                 | 1q23.2   | synonymous SNV    | NM_052868: c.G1326A: p.E442E     | rs2295622   | Hetero | Hetero | Hetero |
| IGSF8                 | 1q23.2   | synonymous SNV    | NM_052868: c.T1299C: p.H433H     | rs2295621   | Hetero | Hetero | Hetero |
| FCRLB                 | 1q23.3   | synonymous SNV    | NM_001002901: c.G864C: p.P288P   | rs11585450  | Hetero | Hetero | Hetero |
| DDR2                  | 1q23.3   | synonymous SNV    | NM_006182: c.C1260G: p.L420L     | rs2298258   | Hetero | Hetero | Hetero |
| DDR2                  | 1q23.3   | synonymous SNV    | NM_006182: c.G2544C: p.L848L     |             | Hetero | Hetero | Hetero |
| NLRP3                 | 1q44     | synonymous SNV    | NM_001127462: c.G732A: p.A244A   | rs3806268   | Hetero | Hetero | Hetero |
| OR2B11                | 1q44     | synonymous SNV    | NM_001004492: c.C33T: p.D11D     | rs12028142  | Hetero | Hetero | Hetero |
| OR2C3                 | 1q44     | synonymous SNV    | NM_198074: c.C856T: p.L286L      | rs6702695   | Hetero | Hetero | Hetero |
| OR2T4                 | 1q44     | synonymous SNV    | NM_001004696: c.A171T: p.A57A    | rs28415565  | Hetero | Hetero | Hetero |
| OR2T4                 | 1q44     | synonymous SNV    | NM_001004696: c.T189C: p.I63I    | rs28499298  | Hetero | Hetero | Hetero |
| OR2T4                 | 1q44     | synonymous SNV    | NM_001004696: c.C264T: p.H88H    | rs28482938  | Hetero | Hetero | Hetero |
| OR2T4                 | 1q44     | synonymous SNV    | NM_001004696: c.C765A: p.L255L   | rs28405645  | Hetero | Hetero | Hetero |
| OR2T4                 | 1q44     | synonymous SNV    | NM_001004696: c.C768T: p.T256T   | rs28602650  | Hetero | Hetero | Hetero |
| OR14I1                | 1q44     | synonymous SNV    | NM_001004734: c.C195T: p.S65S    | rs11485825  | Hetero | Hetero | Hetero |
| TFCP2L1               | 2q14.2   | synonymous SNV    | NM_014553: c.C1254T: p.I418I     | rs2304667   | Hetero | Hetero | Hetero |
| GPR55                 | 2q37.1   | synonymous SNV    | NM_005683: c.C834T: p.N278N      | rs2396777   | Hetero | Hetero | Hetero |
| GPR55                 | 2q37.1   | synonymous SNV    | NM_005683: c.A381C: p.L127L      | rs1992186   | Hetero | Hetero | Hetero |
| ARMC9                 | 2q37.1   | synonymous SNV    | NM_025139: c.C1833T: p.L611L     | rs1669083   | Hetero | Hetero | Hetero |
| ARMC9                 | 2q37.1   | synonymous SNV    | NM_025139: c.G1866A: p.T622T     | rs1669084   | Hetero | Hetero | Hetero |
| GIGYF2                | 2q37.1   | synonymous SNV    | NM_001103148: c.G1536A: p.E512E  | rs2305138   | Hetero | Hetero | Hetero |
| DGKD                  | 2q37.1   | synonymous SNV    | NM_003648: c.C1800T: p.F600F     | rs146366997 | Hetero | Hetero | Hetero |
| HJURP                 | 2q37.1   | synonymous SNV    | NM_018410: c.C2157T: p.P719P     | rs3771334   | Hetero | Hetero | Hetero |
| TRPM8                 | 2q37.1   | synonymous SNV    | NM_024080: c.A747T: p.P249P      | rs28901637  | Hetero | Hetero | Hetero |
| LRN1                  | 3p26.2   | synonymous SNV    | NM_020873: c.A768G: p.Q256Q      | rs9844909   | Hetero | Hetero | Hetero |
| ITPR1                 | 3p26.1   | synonymous SNV    | NM_001168272: c.G1962A: p.K654K  | rs2306875   | Hetero | Hetero | Hetero |
| NUP210                | 3p25.1   | synonymous SNV    | NM_024923: c.C4332T: p.C1444C    | rs2271509   | Hetero | Hetero | Hetero |
| NUP210                | 3p25.1   | synonymous SNV    | NM_024923: c.G3489A: p.E1163E    | rs3773302   | Hetero | Hetero | Hetero |

|              |         |                |                                  |             |        |        |        |
|--------------|---------|----------------|----------------------------------|-------------|--------|--------|--------|
| WNT7A        | 3p25.1  | synonymous SNV | NM_004625: c.T459C: p.S153S      | rs3762719   | Hetero | Hetero | Hetero |
| WNT7A        | 3p25.1  | synonymous SNV | NM_004625: c.G315A: p.A105A      | rs12639607  | Hetero | Hetero | Hetero |
| CNTN3        | 3p12.3  | synonymous SNV | NM_020872: c.A1155G: p.Q385Q     | rs6549590   | Hetero | Hetero | Hetero |
| GBE1         | 3p12.2  | synonymous SNV | NM_000158: c.G579A: p.K193K      | rs17019144  | Hetero | Hetero | Hetero |
| GBE1         | 3p12.2  | synonymous SNV | NM_000158: c.C342T: p.Y114Y      | rs13320194  | Hetero | Hetero | Hetero |
| CHMP2B       | 3p11.2  | synonymous SNV | NM_014043: c.C27T: p.T9T         | rs2279720   | Hetero | Hetero | Hetero |
| CHMP2B       | 3p11.2  | synonymous SNV | NM_001244644: c.A249C: p.T83T    | rs1044499   | Hetero | Hetero | Hetero |
| MORC1        | 3q13.13 | synonymous SNV | NM_014429: c.G2340C: p.P780P     | rs5923723   | Hetero | Hetero | Hetero |
| MORC1        | 3q13.13 | synonymous SNV | NM_014429: c.G2337C: p.V779V     | rs76539963  | Hetero | Hetero | Hetero |
| TAGLN3       | 3q13.2  | synonymous SNV | NM_001008273: c.A348T: p.L116L   | rs2292583   | Hetero | Hetero | Hetero |
| CD200R1      | 3q13.2  | synonymous SNV | NM_170780: c.G789A: p.L263L      | rs72491121  | Homo   | Hetero | Homo   |
| BOC          | 3q13.2  | synonymous SNV | NM_033254: c.C903T: p.A301A      | rs3814399   | Hetero | Hetero | Hetero |
| BOC          | 3q13.2  | synonymous SNV | NM_033254: c.C2985T: p.D995D     | rs34600669  | Hetero | Hetero | Hetero |
| WDR52        | 3q13.2  | synonymous SNV | NM_001164496: c.A4176G: p.L1392L | rs7650771   | Hetero | Hetero | Hetero |
| WDR52        | 3q13.2  | synonymous SNV | NM_001164496: c.C156T: p.T52T    | rs58474121  | Hetero | Hetero | Hetero |
| SPICE1       | 3q13.2  | synonymous SNV | NM_144718: c.G2301A: p.Q767Q     | rs11920725  | Hetero | Hetero | Hetero |
| SIDT1        | 3q13.2  | synonymous SNV | NM_017699: c.C174T: p.L58L       | rs3732799   | Hetero | Hetero | Hetero |
| SIDT1        | 3q13.2  | synonymous SNV | NM_017699: c.G1368T: p.A456A     |             | Hetero | Hetero | Hetero |
| ADPRH        | 3q13.33 | synonymous SNV | NM_0011125: c.T546A: p.A182A     | rs25676     | Homo   | Hetero | Hetero |
| IQCB1        | 3q13.33 | synonymous SNV | NM_001023570: c.C574T: p.L192L   | rs4543051   | Hetero | Hetero | Hetero |
| TRK2         | 3q29    | synonymous SNV | NM_005781: c.C1719T: p.F573F     | rs1056726   | Hetero | Hetero | Hetero |
| LNR33        | 3q29    | synonymous SNV | NM_198565: c.G1893A: p.T631T     | rs116984491 | Hetero | Hetero | Hetero |
| SENP5        | 3q29    | synonymous SNV | NM_152699: c.C1023T: p.D341D     | rs34533379  | Homo   | Hetero | Hetero |
| MFI2         | 3q29    | synonymous SNV | NM_005929: c.A1179G: p.P393P     | rs9855410   | Homo   | Hetero | Hetero |
| MFI2         | 3q29    | synonymous SNV | NM_005929: c.A1011G: p.T337T     | rs6779362   | Homo   | Hetero | Hetero |
| MFI2         | 3q29    | synonymous SNV | NM_033316: c.A756G: p.E252E      | rs1056664   | Homo   | Hetero | Hetero |
| DAPP1        | 4q23    | synonymous SNV | NM_014395: c.C654T: p.F218F      | rs3737484   | Hetero | Hetero | Hetero |
| C5orf60      | 5q35.3  | synonymous SNV | NM_001142306: c.T156C: p.L52I    | rs4990390   | Homo   | Hetero | Hetero |
| RNF130       | 5q35.3  | synonymous SNV | NM_018434: c.G108A: p.T36T       | rs3749821   | Homo   | Hetero | Hetero |
| RNF130       | 5q35.3  | synonymous SNV | NM_018434: c.C45A: p.L15L        | rs3828698   | Homo   | Hetero | Hetero |
| BACH2        | 6q15    | synonymous SNV | NM_001170794: c.C1071T: p.P357P  | rs2236182   | Hetero | Hetero | Hetero |
| ARMC2        | 6q21    | synonymous SNV | NM_032131: c.T1314C: p.G438G     | rs11153136  | Hetero | Hetero | Hetero |
| VGLL2        | 6q22.1  | synonymous SNV | NM_182645: c.T441C: p.N147N      | rs13194610  | Hetero | Hetero | Hetero |
| ROS1         | 6q22.1  | synonymous SNV | NM_002944: c.A6247C: p.R2083R    | rs552183    | Hetero | Hetero | Hetero |
| GRM1         | 6q24.3  | synonymous SNV | NM_000838: c.T3213G: p.P1071P    | rs1047006   | Hetero | Hetero | Hetero |
| ABCY4        | 7q21.12 | synonymous SNV | NM_000443: c.C175T: p.L59L       | rs2302387   | Hetero | Hetero | Hetero |
| IFRD1        | 7q31.1  | synonymous SNV | NM_001197079: c.G897A: p.R299R   | rs2074796   | Hetero | Hetero | Hetero |
| MET          | 7q31.2  | synonymous SNV | NM_000245: c.C3858T: p.D1286D    | rs41736     | Hetero | Hetero | Hetero |
| MET          | 7q31.2  | synonymous SNV | NM_000245: c.G4017A: p.A1339A    | rs2023748   | Hetero | Hetero | Hetero |
| MET          | 7q31.2  | synonymous SNV | NM_000245: c.G4092A: p.P1364P    | rs41737     | Hetero | Hetero | Hetero |
| SPAM1        | 7q31.32 | synonymous SNV | NM_001174044: c.G582A: p.K194K   | rs2285996   | Hetero | Hetero | Hetero |
| FAM71F1      | 7q32.1  | synonymous SNV | NM_032599: c.C441A: p.L147L      | rs745229    | Hetero | Hetero | Hetero |
| AHCYL2       | 7q32.1  | synonymous SNV | NM_001130720: c.C213T: p.A71A    | rs4731565   | Hetero | Hetero | Hetero |
| PODXL        | 7q32.3  | synonymous SNV | NM_001018111: c.C34T: p.L12L     | rs7780021   | Hetero | Hetero | Hetero |
| PRDM14       | 8q13.3  | synonymous SNV | NM_024504: c.G963A: p.T321T      | rs3750227   | Homo   | Hetero | Hetero |
| RIPK2        | 8q21.3  | synonymous SNV | NM_003821: c.C27T: p.A9A         | rs2293809   | Hetero | Hetero | Hetero |
| KCNV2        | 9p24.2  | synonymous SNV | NM_133497: c.C795G: p.A265A      | rs12237048  | Hetero | Hetero | Hetero |
| ANKS6        | 9q22.33 | synonymous SNV | NM_173551: c.C330T: p.Y110Y      | rs76903503  | Hetero | Hetero | Hetero |
| TEX10        | 9q31.1  | synonymous SNV | NM_001161584: c.T468C: p.T156T   | rs147362758 | Hetero | Hetero | Hetero |
| SMC2         | 9q31.1  | synonymous SNV | NM_001042550: c.C2508T: p.Y836Y  | rs6479217   | Hetero | Hetero | Hetero |
| SMC2         | 9q31.1  | synonymous SNV | NM_001042550: c.G3222A: p.L1074L | rs7872034   | Hetero | Hetero | Hetero |
| SMC2         | 9q31.1  | synonymous SNV | NM_001042550: c.A3504G: p.V1168V | rs16923746  | Hetero | Hetero | Hetero |
| ABCA1        | 9q31.1  | synonymous SNV | NM_005502: c.G474A: p.L158L      | rs2230805   | Hetero | Hetero | Hetero |
| ZNF462       | 9q31.2  | synonymous SNV | NM_021224: c.T1095C: p.Y365Y     | rs1000152   | Hetero | Hetero | Hetero |
| IKBKAP       | 9q31.3  | synonymous SNV | NM_003640: c.G3069C: p.L1023L    | rs1063110   | Hetero | Hetero | Hetero |
| CTNNA1       | 9q31.3  | synonymous SNV | NM_003798: c.G423A: p.V141V      | rs2297581   | Hetero | Hetero | Hetero |
| C9orf5       | 9q31.3  | synonymous SNV | NM_032012: c.C702T: p.S234S      | rs2271878   | Hetero | Hetero | Hetero |
| C9orf5       | 9q31.3  | synonymous SNV | NM_032012: c.A267G: p.L89L       | rs6825      | Hetero | Hetero | Hetero |
| C9orf84      | 9q31.3  | synonymous SNV | NM_001080551: c.T1728C: p.P576P  | rs12352352  | Hetero | Hetero | Hetero |
| C9orf84      | 9q31.3  | synonymous SNV | NM_001080551: c.A1209C: p.A403A  | rs10512411  | Hetero | Hetero | Hetero |
| HSDL2        | 9q32    | synonymous SNV | NM_001195822: c.A675G: p.K225K   | rs3739696   | Hetero | Hetero | Hetero |
| BSPRY        | 9q32    | synonymous SNV | NM_017688: c.A468G: p.K156K      | rs752757    | Hetero | Hetero | Hetero |
| DFNB31       | 9q32    | synonymous SNV | NM_001173425: c.G117A: p.V39V    | rs2297815   | Hetero | Hetero | Hetero |
| LOC100505478 | 9q32    | synonymous SNV | NM_001199233: c.G105A: p.Q35Q    | rs2296948   | Hetero | Hetero | Hetero |
| TNC          | 9q33.1  | synonymous SNV | NM_002160: c.A5673G: p.R1891R    | rs12347433  | Hetero | Hetero | Hetero |
| PAPPA        | 9q33.1  | synonymous SNV | NM_002581: c.T4803C: p.D1601D    | rs10759836  | Hetero | Hetero | Hetero |
| ASTN2        | 9q33.1  | synonymous SNV | NM_014010: c.C1314T: p.S438S     | rs61736198  | Hetero | Hetero | Hetero |
| OBP2B        | 9q34.2  | synonymous SNV | NM_014581: c.A217C: p.R73R       | rs2073870   | Homo   | Homo   | Homo   |
| USP6NL       | 10p14   | synonymous SNV | NM_001080491: c.A2226G: p.P742P  | rs12570211  | Hetero | Hetero | Hetero |
| OPTN         | 10p13   | synonymous SNV | NM_021980: c.G102A: p.T34T       | rs2234968   | Hetero | Hetero | Hetero |
| MCM10        | 10p13   | synonymous SNV | NM_018518: c.T2418C: p.H806H     | rs2277221   | Hetero | Hetero | Hetero |

|           |          |                |                                  |             |        |        |        |
|-----------|----------|----------------|----------------------------------|-------------|--------|--------|--------|
| C1QL3     | 10p13    | synonymous SNV | NM_001010908: c.C465T: p.H155H   | rs72772306  | Hetero | Hetero | Hetero |
| CUBN      | 10p13    | synonymous SNV | NM_001081: c.T4563A: p.I1521I    | rs1801229   | Hetero | Hetero | Hetero |
| OTUD1     | 10p12.2  | synonymous SNV | NM_001145373: c.G444C: p.L148L   | rs117004549 | Hetero | Hetero | Hetero |
| MYO3A     | 10p12.1  | synonymous SNV | NM_017433: c.G2133A: p.L711L     | rs56147819  | Hetero | Hetero | Hetero |
| MASTL     | 10p12.1  | synonymous SNV | NM_001172303: c.C1782T: p.I594I  | rs1981296   | Hetero | Hetero | Hetero |
| MASTL     | 10p12.1  | synonymous SNV | NM_001172304: c.T2502C: p.T834T  | rs10741130  | Hetero | Hetero | Hetero |
| ACBD5     | 10p12.1  | synonymous SNV | NM_001042473: c.A414G: p.P138P   | rs10764690  | Hetero | Hetero | Hetero |
| RHOBTB1   | 10q21.2  | synonymous SNV | NM_014836: c.T1572C: p.S524S     | rs2271128   | Hetero | Hetero | Hetero |
| PBLD      | 10q21.3  | synonymous SNV | NM_001033083: c.G516A: p.S172S   |             | Hetero | Hetero | Hetero |
| AIFM2     | 10q22.1  | synonymous SNV | NM_001198696: c.C729T: p.T243T   | rs118135233 | Hetero | Hetero | Hetero |
| NPFFR1    | 10q22.1  | synonymous SNV | NM_022146: c.C201T: p.I67I       | rs3812696   | Hetero | Hetero | Hetero |
| ADAMTS14  | 10q22.1  | synonymous SNV | NM_080722: c.C2856T: p.C952C     | rs2587475   | Hetero | Hetero | Hetero |
| SGPL1     | 10q22.1  | synonymous SNV | NM_003901: c.C942T: p.V314V      | rs865832    | Hetero | Hetero | Hetero |
| SGPL1     | 10q22.1  | synonymous SNV | NM_003901: c.A1305G: p.E435E     | rs114461640 | Hetero | Hetero | Hetero |
| ZC3H12C   | 11q22.3  | synonymous SNV | NM_033390: c.A2445G: p.Q815Q     | rs74548991  | Hetero | Hetero | Hetero |
| HTR3A     | 11q23.2  | synonymous SNV | NM_000869: c.C48T: p.L16L        | rs33940208  | Hetero | Hetero | Hetero |
| HTR3A     | 11q23.2  | synonymous SNV | NM_213621: c.A1491G: p.L497L     | rs1176713   | Hetero | Hetero | Hetero |
| CACNA2D4  | 12p13.33 | synonymous SNV | NM_172364: c.C2649T: p.C883C     | rs184770223 | Hetero | Hetero | Hetero |
| TSPAN9    | 12p13.32 | synonymous SNV | NM_001168320: c.T174C: p.I58I    | rs16930370  | Hetero | Hetero | Hetero |
| MLL2      | 12q13.12 | synonymous SNV | NM_003482: c.A12510G: p.P4170P   | rs3741622   | Hetero | Hetero | Hetero |
| MLL2      | 12q13.12 | synonymous SNV | NM_003482: c.G10836A: p.Q3612Q   | rs3782357   | Hetero | Hetero | Hetero |
| MLL2      | 12q13.12 | synonymous SNV | NM_003482: c.G7479T: p.G2493G    | rs10747559  | Hetero | Hetero | Hetero |
| MLL2      | 12q13.12 | synonymous SNV | NM_003482: c.C2826T: p.I942I     | rs2241726   | Hetero | Hetero | Hetero |
| NCKAP5L   | 12q13.12 | synonymous SNV | NM_001037806: c.G1836T: p.S612S  | rs2720298   | Hetero | Hetero | Hetero |
| NCKAP5L   | 12q13.12 | synonymous SNV | NM_001037806: c.G990A: p.Q330Q   | rs3741555   | Hetero | Hetero | Hetero |
| CERS5     | 12q13.12 | synonymous SNV | NM_147190: c.C753T: p.D251D      | rs3741562   | Hetero | Hetero | Hetero |
| FAM186A   | 12q13.12 | synonymous SNV | NM_001145475: c.T1321C: p.L441L  | rs4421818   | Hetero | Hetero | Hetero |
| DIP2B     | 12q13.12 | synonymous SNV | NM_173602: c.T2946C: p.N982N     | rs3803181   | Hetero | Hetero | Hetero |
| GALNT6    | 12q13.13 | synonymous SNV | NM_007210: c.A603G: p.L201L      | rs2277379   | Hetero | Hetero | Hetero |
| FGD6      | 12q22    | synonymous SNV | NM_018351: c.A2850G: p.Q950Q     | rs11829776  | Hetero | Hetero | Hetero |
| USP44     | 12q22    | synonymous SNV | NM_001042403: c.T996C: p.Y332Y   | rs3812814   | Hetero | Hetero | Hetero |
| SLC17A8   | 12q23.1  | synonymous SNV | NM_001145288: c.G171A: p.T57T    | rs11110359  | Hetero | Hetero | Hetero |
| ANO4      | 12q23.1  | synonymous SNV | NM_178826: c.G2487A: p.P829P     | rs17031025  | Hetero | Hetero | Hetero |
| SART3     | 12q23.3  | synonymous SNV | NM_014706: c.C528T: p.A176A      | rs12579216  | Hetero | Hetero | Hetero |
| TMEM119   | 12q23.3  | synonymous SNV | NM_181724: c.C48G: p.L16L        | rs10861953  | Hetero | Hetero | Hetero |
| TPCN1     | 12q24.13 | synonymous SNV | NM_017901: c.C2442T: p.T814T     |             | Hetero | Hetero | Hetero |
| FBXO21    | 12q24.22 | synonymous SNV | NM_015002: c.C1692T: p.N564N     | rs3741467   | Hetero | Hetero | Hetero |
| NOS1      | 12q24.22 | synonymous SNV | NM_001204213: c.C1698T: p.H566H  | rs1047735   | Hetero | Hetero | Hetero |
| VSIG10    | 12q24.23 | synonymous SNV | NM_019086: c.G801A: p.V267V      | rs79975193  | Hetero | Hetero | Hetero |
| OASL      | 12q24.31 | synonymous SNV | NM_003733: c.G1509A: p.S503S     | rs12819210  | Hetero | Hetero | Hetero |
| OASL      | 12q24.31 | synonymous SNV | NM_003733: c.C408T: p.L136L      | rs3213545   | Hetero | Hetero | Hetero |
| DENR      | 12q24.31 | synonymous SNV | NM_003677: c.C570T: p.I190I      | rs185706767 | Hetero | Hetero | Hetero |
| TMEM132B  | 12q24.32 | synonymous SNV | NM_052907: c.T963A: p.G321G      | rs3809261   | Hetero | Hetero | Hetero |
| TMEM132C  | 12q24.32 | synonymous SNV | NM_001136103: c.G3099A: p.G1033G |             | Hetero | Hetero | Hetero |
| GALNT9    | 12q24.33 | synonymous SNV | NM_021808: c.A423C: p.G141G      | rs12308155  | Hetero | Hetero | Hetero |
| GALNT9    | 12q24.33 | synonymous SNV | NM_021808: c.T420C: p.D140D      | rs12306514  | Hetero | Hetero | Hetero |
| GOLGA3    | 12q24.33 | synonymous SNV | NM_001172557: c.A414G: p.T138T   | rs7134809   | Hetero | Hetero | Hetero |
| CHFR      | 12q24.33 | synonymous SNV | NM_001161347: c.T1429C: p.L477L  | rs2306537   | Hetero | Hetero | Hetero |
| CHFR      | 12q24.33 | synonymous SNV | NM_001161347: c.A609C: p.P203P   | rs35011845  | Hetero | Hetero | Hetero |
| ZNF140    | 12q24.33 | synonymous SNV | NM_003440: c.A792G: p.Q264Q      | rs710945    | Hetero | Hetero | Hetero |
| LOC647589 | 12q24.33 | synonymous SNV | NM_001191054: c.G351A: p.P117P   | rs147259575 | Hetero | Hetero | Hetero |
| LOC647589 | 12q24.33 | synonymous SNV | NM_001191054: c.C240G: p.R80R    | rs141475940 | Hetero | Hetero | Hetero |
| SACS      | 13q12.12 | synonymous SNV | NM_014363: c.T9981C: p.A3327A    | rs2737700   | Hetero | Hetero | Homo   |
| SACS      | 13q12.12 | synonymous SNV | NM_014363: c.G6267A: p.S2089S    | rs9550956   | Hetero | Hetero | Homo   |
| SACS      | 13q12.12 | synonymous SNV | NM_014363: c.C4188T: p.H1396H    | rs61754477  | Hetero | Hetero | Homo   |
| SHISA2    | 13q12.13 | synonymous SNV | NM_001007538: c.C762T: p.H254H   | rs77556088  | Hetero | Hetero | Hetero |
| SHISA2    | 13q12.13 | synonymous SNV | NM_001007538: c.C615T: p.N205N   | rs77010561  | Hetero | Hetero | Hetero |
| SLC7A1    | 13q12.3  | synonymous SNV | NM_003045: c.C423G: p.G141G      | rs2277451   | Homo   | Hetero | Hetero |
| BRCA2     | 13q13.1  | synonymous SNV | NM_000059: c.A1365G: p.S455S     | rs1801439   | Hetero | Hetero | Hetero |
| BRCA2     | 13q13.1  | synonymous SNV | NM_000059: c.T2229C: p.H743H     | rs1801499   | Hetero | Hetero | Hetero |
| KL        | 13q13.1  | synonymous SNV | NM_004795: c.C1767T: p.H589H     | rs564481    | Hetero | Hetero | Hetero |
| ELF1      | 13q14.11 | synonymous SNV | NM_001145353: c.A1059G: p.P353P  | rs9562247   | Hetero | Hetero | Hetero |
| ELF1      | 13q14.11 | synonymous SNV | NM_001145353: c.A873G: p.L291L   | rs9562248   | Hetero | Hetero | Hetero |
| DNAJC15   | 13q14.11 | synonymous SNV | NM_013238: c.A132C: p.G44G       | rs3783044   | Hetero | Hetero | Hetero |
| HNRNPA1L2 | 13q14.3  | synonymous SNV | NM_0010111725: c.C408A: p.I136I  | rs78145640  | Hetero | Homo   | Hetero |
| MYCBP2    | 13q22.3  | synonymous SNV | NM_015057: c.C7302T: p.I243A     |             | Hetero | Hetero | Hetero |
| EDNRB     | 13q22.3  | synonymous SNV | NM_001122659: c.A831G: p.L277L   | rs5351      | Hetero | Hetero | Hetero |
| UGT2      | 13q32.1  | synonymous SNV | NM_020121: c.T4074C: p.T1358T    | rs11070154  | Hetero | Hetero | Hetero |
| IPO5      | 13q32.2  | synonymous SNV | NM_002271: c.A2763C: p.A921A     | rs2296092   | Hetero | Hetero | Hetero |
| SLC15A1   | 13q32.3  | synonymous SNV | NM_005073: c.G843A: p.T281T      | rs8187812   | Hetero | Hetero | Hetero |
| INF2      | 14q32.33 | synonymous SNV | NM_001031714: c.G1227T: p.S409S  | rs3809455   | Hetero | Hetero | Hetero |

|          |          |                |                                  |             |        |        |        |
|----------|----------|----------------|----------------------------------|-------------|--------|--------|--------|
| ZBTB42   | 14q32.33 | synonymous SNV | NM_001137601: c.A45G: p.R15R     | rs12878684  | Hetero | Hetero | Hetero |
| ZBTB42   | 14q32.33 | synonymous SNV | NM_001137601: c.G570A: p.L190L   | rs10141867  | Hetero | Hetero | Hetero |
| LRRK1    | 15q26.3  | synonymous SNV | NM_024652: c.G4161A: p.L1387L    | rs41372244  | Hetero | Hetero | Hetero |
| LRRK1    | 15q26.3  | synonymous SNV | NM_024652: c.C5619T: p.T1873T    | rs3764739   | Hetero | Hetero | Hetero |
| TARSL2   | 15q26.3  | synonymous SNV | NM_152334: c.C1587T: p.S529S     | rs12901450  | Hetero | Hetero | Hetero |
| CDH3     | 16q22.1  | synonymous SNV | NM_001793: c.G720A: p.T240T      | rs2296409   | Homo   | Hetero | Hetero |
| CDH3     | 16q22.1  | synonymous SNV | NM_001793: c.C813A: p.T271T      | rs2296408   | Homo   | Hetero | Hetero |
| CDH3     | 16q22.1  | synonymous SNV | NM_001793: c.T1626C: p.N542N     | rs2296405   | Homo   | Hetero | Hetero |
| CDH3     | 16q22.1  | synonymous SNV | NM_001793: c.G1956A: p.K652K     | rs2274239   | Homo   | Hetero | Hetero |
| CDH3     | 16q22.1  | synonymous SNV | NM_001793: c.C2239A: p.R747R     | rs17715450  | Homo   | Hetero | Hetero |
| IST1     | 16q22.2  | synonymous SNV | NM_014761: c.C174T: p.H58H       | rs1049794   | Homo   | Hetero | Hetero |
| CNTNAP4  | 16q23.1  | synonymous SNV | NM_138994: c.T3375C: p.T1125T    | rs7184958   | Hetero | Hetero | Hetero |
| SMCR7    | 17p11.2  | synonymous SNV | NM_139162: c.T792C: p.A264A      | rs2605143   | Hetero | Hetero | Hetero |
| SLC5A10  | 17p11.2  | synonymous SNV | NM_001042450: c.C948A: p.I316I   | rs2472715   | Hetero | Hetero | Hetero |
| NF1      | 17q11.2  | synonymous SNV | NM_000267: c.G702A: p.L234L      | rs1801052   | Hetero | Hetero | Hetero |
| EVI2A    | 17q11.2  | synonymous SNV | NM_001003927: c.C69T: p.S23S     | rs1129506   | Hetero | Hetero | Hetero |
| ACCN1    | 17q12    | synonymous SNV | NM_001094: c.T315C: p.N105N      | rs2228990   | Hetero | Hetero | Hetero |
| ACCN1    | 17q12    | synonymous SNV | NM_001094: c.G282C: p.L94L       | rs2228989   | Hetero | Hetero | Hetero |
| KRTAP4-8 | 17q21.2  | synonymous SNV | NM_031960: c.C522T: p.C174C      | rs77163010  | Hetero | Homo   | Hetero |
| AKAP1    | 17q22    | synonymous SNV | NM_003488: c.T378C: p.D126D      | rs2230772   | Homo   | Hetero | Hetero |
| AKAP1    | 17q22    | synonymous SNV | NM_003488: c.T891C: p.D297D      | rs1050515   | Homo   | Hetero | Hetero |
| 4-Sep    | 17q22    | synonymous SNV | NM_001198713: c.G33A: p.E11E     | rs8073754   | Homo   | Hetero | Hetero |
| TEX14    | 17q22    | synonymous SNV | NM_031272: c.A4173G: p.K1391K    | rs9903050   | Homo   | Hetero | Hetero |
| TEX14    | 17q22    | synonymous SNV | NM_001201457: c.A957G: p.L319L   | rs8077548   | Homo   | Hetero | Hetero |
| ACE      | 17q23.3  | synonymous SNV | NM_000789: c.C1215T: p.P405P     | rs4309      | Homo   | Hetero | Hetero |
| ACE      | 17q23.3  | synonymous SNV | NM_001178057: c.C81T: p.P27P     | rs4316      | Homo   | Hetero | Hetero |
| ACE      | 17q23.3  | synonymous SNV | NM_001178057: c.A471G: p.A157A   | rs4331      | Homo   | Hetero | Hetero |
| ACE      | 17q23.3  | synonymous SNV | NM_001178057: c.G606A: p.T202T   | rs4343      | Homo   | Hetero | Hetero |
| ACE      | 17q23.3  | synonymous SNV | NM_152830: c.T1665C: p.F555F     | rs4362      | Homo   | Hetero | Hetero |
| C17orf80 | 17q25.1  | synonymous SNV | NM_001100621: c.A1509G: p.S503S  | rs11869253  | Homo   | Hetero | Hetero |
| KIF19    | 17q25.1  | synonymous SNV | NM_153209: c.G2370A: p.S790S     | rs72852235  | Homo   | Hetero | Hetero |
| KIF19    | 17q25.1  | synonymous SNV | NM_153209: c.C2952T: p.H984H     | rs2271536   | Homo   | Hetero | Hetero |
| SMCHD1   | 18p11.32 | synonymous SNV | NM_015295: c.C4629T: p.G1543G    | rs483547    | Hetero | Hetero | Hetero |
| EMILIN2  | 18p11.32 | synonymous SNV | NM_032048: c.T1353C: p.N451N     | rs3810067   | Hetero | Hetero | Hetero |
| LPIN2    | 18p11.31 | synonymous SNV | NM_014646: c.G2202A: p.S734S     |             | Hetero | Hetero | Hetero |
| LAMA1    | 18p11.31 | synonymous SNV | NM_005559: c.C8982T: p.D2994D    | rs2016639   | Hetero | Hetero | Hetero |
| LAMA1    | 18p11.31 | synonymous SNV | NM_005559: c.C6850T: p.L2284L    | rs77810945  | Hetero | Hetero | Hetero |
| LAMA3    | 18q11.2  | synonymous SNV | NM_001127718: c.C1152G: p.A384A  | rs1154226   | Hetero | Hetero | Hetero |
| LAMA3    | 18q11.2  | synonymous SNV | NM_001127718: c.C3736T: p.L1246L | rs1131521   | Hetero | Hetero | Hetero |
| ZADH2    | 18q22.3  | synonymous SNV | NM_175907: c.C225T: p.N75N       | rs7230037   | Hetero | Hetero | Hetero |
| TMEM38A  | 19p13.11 | synonymous SNV | NM_024074: c.C189T: p.F63F       | rs730120    | Hetero | Hetero | Hetero |
| MAST3    | 19p13.11 | synonymous SNV | NM_015016: c.C648T: p.H216H      |             | Hetero | Hetero | Hetero |
| KIAA1683 | 19p13.11 | synonymous SNV | NM_001145304: c.C2787T: p.P929P  | rs12608744  | Hetero | Hetero | Hetero |
| KIAA1683 | 19p13.11 | synonymous SNV | NM_001145304: c.G2691A: p.L897L  | rs12608843  | Hetero | Hetero | Hetero |
| NCAN     | 19p13.11 | synonymous SNV | NM_004386: c.G2856A: p.P952P     | rs10406347  | Hetero | Hetero | Hetero |
| ZNF626   | 19p12    | synonymous SNV | NM_001076675: c.T1383C: p.A461A  | rs4808252   | Hetero | Homo   | Homo   |
| ZNF98    | 19p12    | synonymous SNV | NM_001098626: c.T153C: p.F51F    | rs1368476   | Homo   | Hetero | Hetero |
| VSTM2B   | 19q12    | synonymous SNV | NM_001146339: c.G666C: p.S222S   | rs115230064 | Hetero | Hetero | Hetero |
| C19orf12 | 19q12    | synonymous SNV | NM_001031726: c.C357T: p.T119T   | rs10424582  | Hetero | Hetero | Hetero |
| SIRPB1   | 20p13    | synonymous SNV | NM_001135844: c.A261C: p.P87P    |             | Homo   | Homo   | Homo   |
| RHBDD3   | 22q12.2  | synonymous SNV | NM_012265: c.G396A: p.E132E      | rs879580    | Hetero | Hetero | Hetero |
| GAS2L1   | 22q12.2  | synonymous SNV | NM_152237: c.C30T: p.G10G        | rs11090564  | Hetero | Hetero | Hetero |
| CCDC157  | 22q12.2  | synonymous SNV | NM_001017437: c.C2211T: p.G737G  | rs2286442   | Hetero | Hetero | Hetero |
| RFPL3    | 22q12.3  | synonymous SNV | NM_001098535: c.A879G: p.Q293Q   | rs2076035   | Hetero | Hetero | Hetero |
| C22orf28 | 22q12.3  | synonymous SNV | NM_014306: c.A1446G: p.V482V     | rs11635     | Hetero | Hetero | Hetero |
| C22orf28 | 22q12.3  | synonymous SNV | NM_014306: c.G603A: p.Q201Q      | rs5749426   | Hetero | Hetero | Hetero |
| PRR5     | 22q13.31 | synonymous SNV | NM_001017529: c.C246T: p.I82I    |             | Hetero | Hetero | Hetero |
| ALG12    | 22q13.33 | synonymous SNV | NM_024105: c.A885G: p.A295A      | rs8135963   | Hetero | Hetero | Hetero |
| CRELD2   | 22q13.33 | synonymous SNV | NM_001135101: c.T273C: p.N91N    | rs9616388   | Hetero | Hetero | Hetero |
| CRELD2   | 22q13.33 | synonymous SNV | NM_001135101: c.C600T: p.T200T   | rs7410276   | Hetero | Hetero | Hetero |
| CRELD2   | 22q13.33 | synonymous SNV | NM_024324: c.C1050T: p.R350R     | rs1608      | Hetero | Hetero | Hetero |
| FAM116B  | 22q13.33 | synonymous SNV | NM_001001794: c.C1356G: p.P452P  | rs67248662  | Hetero | Hetero | Hetero |
| KLHDC7B  | 22q13.33 | synonymous SNV | NM_138433: c.C309A: p.G103G      |             | Hetero | Hetero | Hetero |
