# Supplementary material for: TBX1 Mutation Identified by Exome Sequencing in a Japanese Family with 22q11.2 Deletion Syndrome-Like Craniofacial Features and Hypocalcemia
Source: PubMed Central journal article supplement (PMC3956758; doi:10.1371/journal.pone.0091598), 2014-03-17
Supplement: pone.0091598.s007.pdf [file pone.0091598.s007.pdf]

Supplemental Table 5. A list of variants that are present in group 2 and absent from group 1

| Gene                      | Location | Type                    | Substitution                          | dbSNP       | III-1  | III-6  |
|---------------------------|----------|-------------------------|---------------------------------------|-------------|--------|--------|
| <Non-synonymous variants> |          |                         |                                       |             |        |        |
| IL17RC                    | 3p25.3   | nonsynonymous SNV       | NM_001203265:c.G947A:p.R316Q          | rs12054059  | Hetero | Hetero |
| C3orf20                   | 3p25.1   | nonsynonymous SNV       | NM_032137:c.G125A:p.G42D              | rs17040154  | Hetero | Hetero |
| DCLK3                     | 3p22.2   | nonsynonymous SNV       | NM_033403:c.G1048A:p.A350T            |             | Hetero | Hetero |
| VILL                      | 3p22.2   | nonsynonymous SNV       | NM_015873:c.G2315A:p.R772Q            |             | Hetero | Hetero |
| ANO10                     | 3p22.1   | nonsynonymous SNV       | NM_001204833:c.C1226T:p.A409V         | rs150026260 | Hetero | Hetero |
| ZNF501                    | 3p21.31  | nonsynonymous SNV       | NM_145044:c.A190G:p.N64D              |             | Hetero | Hetero |
| EXOSC7                    | 3p21.31  | nonsynonymous SNV       | NM_015004:c.A694G:p.S232G             |             | Hetero | Hetero |
| CCRL2                     | 3p21.31  | nonsynonymous SNV       | NM_001130910:c.T536A:p.F179Y          | rs3204849   | Hetero | Hetero |
| RNF123                    | 3p21.31  | nonsynonymous SNV       | NM_022064:c.G1445A:p.R482Q            |             | Hetero | Hetero |
| TKT                       | 3p21.1   | nonsynonymous SNV       | NM_001064:c.A1306G:p.M436V            | rs141784567 | Hetero | Hetero |
| CCDC66                    | 3p14.3   | nonsynonymous SNV       | NM_001012506:c.A2402T:p.E801V         | rs61747991  | Hetero | Hetero |
| CCDC66                    | 3p14.3   | nonsynonymous SNV       | NM_001012506:c.T2405C:p.L802S         | rs61747994  | Hetero | Hetero |
| ATXN7                     | 3p14.1   | nonsynonymous SNV       | NM_001128149:c.G2149A:p.V717M         | rs3774729   | Hetero | Hetero |
| LRIG1                     | 3p14.1   | nonsynonymous SNV       | NM_015541:c.C169A:p.R57S              |             | Hetero | Hetero |
| SUCLG2                    | 3p14.1   | nonsynonymous SNV       | NM_001177599:c.G1273A:p.V425I         | rs902320    | Hetero | Hetero |
| SUCLG2                    | 3p14.1   | nonsynonymous SNV       | NM_001177599:c.T1210C:p.Y404H         | rs902321    | Hetero | Hetero |
| ZNF717                    | 3p12.3   | nonsynonymous SNV       | NM_001128223:c.G2021A:p.R674H         | rs3009020   | Homo   | Homo   |
| ZNF717                    | 3p12.3   | nonsynonymous SNV       | NM_001128223:c.G1942A:p.V648I         | rs11122676  | Homo   | Homo   |
| NFKBIZ                    | 3q12.3   | nonsynonymous SNV       | NM_031419:c.C920G:p.T307S             | rs3821727   | Hetero | Hetero |
| C3orf17                   | 3q13.2   | nonsynonymous SNV       | NM_015412:c.A1426G:p.T476A            | rs3732813   | Hetero | Hetero |
| C3orf17                   | 3q13.2   | nonsynonymous SNV       | NM_015412:c.C1054T:p.P352S            | rs2306858   | Hetero | Hetero |
| WDR52                     | 3q13.2   | nonsynonymous SNV       | NM_001164496:c.T5163A:p.N1721K        | rs148547745 | Hetero | Hetero |
| KIAA1407                  | 3q13.31  | nonsynonymous SNV       | NM_020817:c.A2088T:p.E696D            | rs6784095   | Hetero | Hetero |
| HTR3D                     | 3q27.1   | nonsynonymous SNV       | NM_182537:c.C589G:p.L197V             | rs75040538  | Hetero | Hetero |
| VPS8                      | 3q27.2   | nonsynonymous SNV       | NM_001009921:c.T4091C:p.I1364T        | rs3821750   | Hetero | Hetero |
| C3orf70                   | 3q27.2   | nonsynonymous SNV       | NM_001025266:c.C454T:p.P152S          | rs61740263  | Hetero | Hetero |
| HRG                       | 3q27.3   | nonsynonymous SNV       | NM_000412:c.T539C:p.I180T             | rs10770     | Hetero | Hetero |
| HRG                       | 3q27.3   | nonsynonymous SNV       | NM_000412:c.C1342T:p.R448C            | rs1042445   | Hetero | Hetero |
| ADAMTS2                   | 5q35.3   | nonframeshift insertion | NM_014244:c.71_72insTGC:p.P24delinsLP |             | Hetero | Hetero |
| MGAT4B                    | 5q35.3   | nonsynonymous SNV       | NM_054013:c.A221G:p.K74R              | rs78450232  | Hetero | Hetero |
| RP1L1                     | 8p23.1   | nonsynonymous SNV       | NM_178857:c.A5666T:p.D1889V           | rs28446662  | Hetero | Hetero |
| RP1L1                     | 8p23.1   | nonsynonymous SNV       | NM_178857:c.C4484G:p.P1495R           | rs4841399   | Hetero | Hetero |
| RP1L1                     | 8p23.1   | nonsynonymous SNV       | NM_178857:c.A4046T:p.Q1349L           | rs13253053  | Hetero | Hetero |
| DLC1                      | 8p22     | nonsynonymous SNV       | NM_001164271:c.G838A:p.V280M          | rs532841    | Hetero | Hetero |
| PDGFRL                    | 8p22     | nonsynonymous SNV       | NM_006207:c.G381T:p.Q127H             |             | Hetero | Hetero |
| PCMI                      | 8p22     | nonsynonymous SNV       | NM_006197:c.G2071T:p.A691S            | rs17635381  | Hetero | Hetero |
| ASAHI                     | 8p22     | nonsynonymous SNV       | NM_004315:c.A325G:p.I109V             | rs1049874   | Hetero | Hetero |
| ASAHI                     | 8p22     | nonsynonymous SNV       | NM_004315:c.G262A:p.V88M              | rs1071645   | Hetero | Hetero |
| ASAHI                     | 8p22     | nonsynonymous SNV       | NM_001127505:c.G187A:p.V63I           | rs3753115   | Hetero | Hetero |
| PSD3                      | 8p22     | nonsynonymous SNV       | NM_015310:c.C878T:p.P293L             | rs13263453  | Hetero | Hetero |
| GFRA2                     | 8p21.3   | nonsynonymous SNV       | NM_001165039:c.T986A:p.L329Q          | rs1128397   | Hetero | Hetero |
| PDLIM2                    | 8p21.3   | nonsynonymous SNV       | NM_021630:c.C389T:p.P130L             | rs11545016  | Hetero | Hetero |
| PDLIM2                    | 8p21.3   | nonsynonymous SNV       | NM_021630:c.C1805T:p.A602V            | rs145349678 | Hetero | Hetero |
| KIAA1967                  | 8p21.3   | nonsynonymous SNV       | NM_021174:c.G1809C:p.Q603H            | rs59511580  | Hetero | Hetero |
| DOCK5                     | 8p21.2   | nonsynonymous SNV       | NM_024940:c.A3068G:p.Q1023R           | rs2271111   | Hetero | Hetero |
| RAB11FIP1                 | 8p11.23  | nonsynonymous SNV       | NM_001002814:c.T1727C:p.V576A         | rs75705762  | Hetero | Hetero |
| KAT6A                     | 8p11.21  | nonsynonymous SNV       | NM_006766:c.T401C:p.L134S             | rs3824276   | Hetero | Hetero |
| NPBWR1                    | 8q11.23  | nonsynonymous SNV       | NM_005285:c.A404T:p.Y135F             | rs33977775  | Hetero | Hetero |
| CPA6                      | 8q13.2   | nonsynonymous SNV       | NM_020361:c.C518G:p.S173C             | rs17853192  | Hetero | Hetero |
| ZBTB10                    | 8q21.13  | nonframeshift deletion  | NM_001105539:c.3_5del:p.L_2del        | rs144692080 | Hetero | Hetero |
| CDH17                     | 8q22.1   | nonsynonymous SNV       | NM_001144663:c.A2216C:p.E739A         | rs1051624   | Hetero | Hetero |
| C8orf38                   | 8q22.1   | nonsynonymous SNV       | NM_152416:c.C805G:p.H269D             |             | Hetero | Hetero |
| NIPAL2                    | 8q22.2   | nonsynonymous SNV       | NM_024759:c.A493C:p.T165P             | rs77774174  | Hetero | Hetero |
| COL14A1                   | 8q24.12  | nonsynonymous SNV       | NM_021110:c.G4024C:p.V1342L           | rs17833992  | Hetero | Hetero |
| SNTB1                     | 8q24.12  | nonsynonymous SNV       | NM_021021:c.G56A:p.R19Q               |             | Hetero | Hetero |
| TG                        | 8q24.22  | nonsynonymous SNV       | NM_003235:c.C4859T:p.T1620M           | rs115902639 | Hetero | Hetero |
| TG                        | 8q24.22  | nonsynonymous SNV       | NM_003235:c.C5995T:p.R1999W           | rs2076740   | Hetero | Hetero |
| ZFAT                      | 8q24.22  | nonsynonymous SNV       | NM_001167583:c.C268T:p.P90S           | rs12541381  | Hetero | Hetero |
| TUSC1                     | 9p21.2   | nonsynonymous SNV       | NM_001004125:c.T622G:p.S208A          | rs72631815  | Hetero | Hetero |
| UBAP2                     | 9p13.3   | nonsynonymous SNV       | NM_018449:c.A1817G:p.N606S            | rs307658    | Hetero | Hetero |
| KIF24                     | 9p13.3   | nonsynonymous SNV       | NM_194313:c.C2510T:p.S837F            | rs41274041  | Hetero | Hetero |
| KIF24                     | 9p13.3   | nonsynonymous SNV       | NM_194313:c.A325G:p.R109G             | rs41274845  | Hetero | Hetero |
| FAM205A                   | 9p13.3   | nonsynonymous SNV       | NM_001141917:c.T1055C:p.F352S         | rs521630    | Homo   | Hetero |
| FAM205A                   | 9p13.3   | nonsynonymous SNV       | NM_001141917:c.C713T:p.T238M          | rs1810820   | Hetero | Hetero |
| FAM205A                   | 9p13.3   | nonsynonymous SNV       | NM_001141917:c.T416G:p.L139R          | rs117956208 | Hetero | Hetero |
| C9orf131                  | 9p13.3   | nonsynonymous SNV       | NM_001040410:c.G560T:p.W187L          | rs615474    | Hetero | Hetero |
| C9orf131                  | 9p13.3   | nonsynonymous SNV       | NM_001040410:c.T1762A:p.S588T         | rs2298312   | Hetero | Hetero |
| SMC5                      | 9q21.12  | nonsynonymous SNV       | NM_015110:c.T922C:p.C308R             | rs1180117   | Hetero | Hetero |

|          |          |                     |                                   |             |        |        |
|----------|----------|---------------------|-----------------------------------|-------------|--------|--------|
| TRPM3    | 9q21.12  | nonsynonymous SNV   | NM_206944:c.A4631C:p.N1544T       | rs17535963  | Hetero | Hetero |
| TRPM3    | 9q21.12  | nonsynonymous SNV   | NM_206944:c.G4586A:p.R1529K       | rs41287373  | Hetero | Hetero |
| TMEM2    | 9q21.13  | nonsynonymous SNV   | NM_001135820:c.G3572A:p.S1191N    | rs2297089   | Hetero | Hetero |
| C9orf47  | 9q22.1   | nonsynonymous SNV   | NM_001001938:c.G497A:p.G166D      |             | Hetero | Hetero |
| C9orf86  | 9q34.3   | nonsynonymous SNV   | NM_001173988:c.C1592T:p.P531L     | rs143011384 | Hetero | Hetero |
| MAMDC4   | 9q34.3   | nonsynonymous SNV   | NM_206920:c.G2005A:p.E669K        | rs76796290  | Hetero | Hetero |
| NDOR1    | 9q34.3   | nonsynonymous SNV   | NM_001144027:c.C740T:p.P247L      | rs117332028 | Hetero | Hetero |
| SLC34A3  | 9q34.3   | nonsynonymous SNV   | NM_001177316:c.G1009A:p.G337S     | rs35699762  | Hetero | Hetero |
| EXD3     | 9q34.3   | nonsynonymous SNV   | NM_017820:c.G2429A:p.R810Q        | rs28685844  | Hetero | Hetero |
| NOXA1    | 9q34.3   | nonsynonymous SNV   | NM_001256067:c.C409A:p.L137I      | rs77546115  | Hetero | Hetero |
| ANKRD16  | 10p15.1  | nonsynonymous SNV   | NM_001009941:c.C383G:p.A128G      | rs2296136   | Hetero | Hetero |
| ANKRD16  | 10p15.1  | nonsynonymous SNV   | NM_001009941:c.G88A:p.G30R        | rs3750659   | Hetero | Hetero |
| PFKFB3   | 10p15.1  | nonsynonymous SNV   | NM_001145443:c.G151A:p.V51I       | rs181651478 | Hetero | Hetero |
| OR4C46   | 11p11.12 | nonsynonymous SNV   | NM_001004703:c.C719T:p.S240F      | rs11246607  | Homo   | Hetero |
| MMP17    | 12q24.33 | nonsynonymous SNV   | NM_016155:c.C386G:p.A129G         | rs4964883   | Hetero | Hetero |
| MMP17    | 12q24.33 | nonsynonymous SNV   | NM_016155:c.G836A:p.R279H         | rs35466884  | Hetero | Hetero |
| ANKLE2   | 12q24.33 | nonsynonymous SNV   | NM_015114:c.G2159A:p.R720H        | rs10781634  | Hetero | Hetero |
| ANKLE2   | 12q24.33 | nonsynonymous SNV   | NM_015114:c.C364T:p.H122Y         | rs1132375   | Hetero | Hetero |
| TUBA3C   | 13q12.11 | nonsynonymous SNV   | NM_006001:c.G1318A:p.V440M        | rs1803092   | Hetero | Hetero |
| LATS2    | 13q12.11 | nonsynonymous SNV   | NM_014572:c.C971T:p.A324V         | rs558614    | Hetero | Hetero |
| ERN2     | 16p12.2  | nonsynonymous SNV   | NM_033266:c.G1604C:p.S535T        | rs26764     | Hetero | Hetero |
| ZKSCAN2  | 16p12.1  | nonsynonymous SNV   | NM_001012981:c.C757T:p.L253F      | rs2112811   | Hetero | Hetero |
| IL21R    | 16p12.1  | nonsynonymous SNV   | NM_021798:c.T734C:p.V245A         | rs138134818 | Hetero | Hetero |
| GTF3C1   | 16p12.1  | nonsynonymous SNV   | NM_001520:c.C3761T:p.A1254V       |             | Hetero | Hetero |
| TBC1D10B | 16p11.2  | nonsynonymous SNV   | NM_015527:c.G202C:p.E68Q          | rs12930787  | Hetero | Hetero |
| BCL7C    | 16p11.2  | nonsynonymous SNV   | NM_004765:c.G368A:p.R123H         |             | Hetero | Hetero |
| PYDC1    | 16p11.2  | frameshift deletion | NM_152901:c.115_134del:p.39_45del |             | Hetero | Hetero |
| ARMC5    | 16p11.2  | nonsynonymous SNV   | NM_001105247:c.C1039T:p.P347S     | rs79238971  | Hetero | Hetero |
| CHD9     | 16q12.2  | nonsynonymous SNV   | NM_025134:c.G6232A:p.V2078I       | rs145249816 | Hetero | Hetero |
| CHD9     | 16q12.2  | nonsynonymous SNV   | NM_025134:c.A8278G:p.T2760A       | rs3743771   | Hetero | Hetero |
| CES5A    | 16q12.2  | nonsynonymous SNV   | NM_145024:c.T1461G:p.D487E        | rs11860456  | Hetero | Hetero |
| NLRC5    | 16q13    | nonsynonymous SNV   | NM_032206:c.C572T:p.P191L         | rs74439742  | Hetero | Hetero |
| GPR56    | 16q21    | nonsynonymous SNV   | NM_001145773:c.G82A:p.A28T        |             | Hetero | Hetero |
| CNGB1    | 16q21    | nonsynonymous SNV   | NM_001297:c.C1435A:p.L479I        | rs2303783   | Hetero | Hetero |
| ENTD6    | 16q21    | nonsynonymous SNV   | NM_001160305:c.C599G:p.P200R      |             | Hetero | Hetero |
| CMTM2    | 16q21    | nonsynonymous SNV   | NM_144673:c.T365C:p.I122T         | rs2290182   | Hetero | Hetero |
| CDH16    | 16q22.1  | nonsynonymous SNV   | NM_001204746:c.C478T:p.H160Y      | rs2271023   | Hetero | Hetero |
| ZDHHC1   | 16q22.1  | nonsynonymous SNV   | NM_013304:c.G374A:p.S125N         |             | Hetero | Hetero |
| NOB1     | 16q22.1  | nonsynonymous SNV   | NM_014062:c.G692A:p.R231Q         | rs3811348   | Hetero | Hetero |
| IL34     | 16q22.1  | stopgain SNV        | NM_001172771:c.C636A:p.Y212X      | rs4985556   | Hetero | Hetero |
| DHODH    | 16q22.2  | nonsynonymous SNV   | NM_001361:c.C1022T:p.A341V        | rs61733129  | Hetero | Hetero |
| HPR      | 16q22.2  | nonsynonymous SNV   | NM_020995:c.G608A:p.R203K         | rs2021171   | Hetero | Hetero |
| HPR      | 16q22.2  | nonsynonymous SNV   | NM_020995:c.T848C:p.V283A         | rs1065360   | Hetero | Hetero |
| LDHD     | 16q23.1  | nonsynonymous SNV   | NM_153486:c.G1345A:p.E449K        | rs78008482  | Hetero | Hetero |
| ADAMTS18 | 16q23.1  | nonsynonymous SNV   | NM_199355:c.T571C:p.Y191H         | rs11643211  | Hetero | Hetero |
| CLEC3A   | 16q23.1  | nonsynonymous SNV   | NM_001244755:c.C433A:p.Q145K      | rs2072663   | Hetero | Hetero |
| HIC1     | 17p13.3  | nonsynonymous SNV   | NM_001098202:c.C1108G:p.P370A     | rs182733310 | Hetero | Hetero |
| SMG6     | 17p13.3  | nonsynonymous SNV   | NM_001170957:c.A929C:p.N310T      | rs1885987   | Hetero | Hetero |
| TSR1     | 17p13.3  | nonsynonymous SNV   | NM_018128:c.A595G:p.K199E         | rs79597880  | Hetero | Hetero |
| KIAA0664 | 17p13.3  | nonsynonymous SNV   | NM_015229:c.G3643A:p.G1215S       |             | Hetero | Hetero |
| SPATA22  | 17p13.2  | nonsynonymous SNV   | NM_001170696:c.G206C:p.R69T       | rs2291604   | Hetero | Hetero |
| TRPV3    | 17p13.2  | nonsynonymous SNV   | NM_145068:c.G1882A:p.A628T        | rs75319568  | Hetero | Hetero |
| SHPK     | 17p13.2  | nonsynonymous SNV   | NM_013276:c.G694A:p.E232K         | rs180851246 | Hetero | Hetero |
| ZZEF1    | 17p13.2  | nonsynonymous SNV   | NM_015113:c.A6040G:p.I2014V       | rs781831    | Hetero | Hetero |
| ZZEF1    | 17p13.2  | nonsynonymous SNV   | NM_015113:c.T4309G:p.S1437A       | rs4790555   | Hetero | Hetero |
| FBXO39   | 17p13.1  | nonsynonymous SNV   | NM_153230:c.C28T:p.P10S           | rs4796555   | Hetero | Hetero |
| TEKT1    | 17p13.1  | nonsynonymous SNV   | NM_053285:c.G933T:p.K311N         | rs77092590  | Hetero | Hetero |
| TEKT1    | 17p13.1  | nonsynonymous SNV   | NM_053285:c.C760T:p.R254C         | rs3744395   | Hetero | Hetero |
| CTDNEP1  | 17p13.1  | nonsynonymous SNV   | NM_001143775:c.A34G:p.T12A        | rs3744399   | Hetero | Hetero |
| SPEM1    | 17p13.1  | nonsynonymous SNV   | NM_199339:c.G794A:p.R265Q         | rs33989543  | Hetero | Hetero |
| CHRN1    | 17p13.1  | nonsynonymous SNV   | NM_000747:c.G725A:p.R242H         | rs79220301  | Hetero | Hetero |
| DNAH2    | 17p13.1  | nonsynonymous SNV   | NM_020877:c.C10799T:p.T3600I      | rs7213894   | Hetero | Hetero |
| DNAH2    | 17p13.1  | nonsynonymous SNV   | NM_020877:c.T13070A:p.V4357D      | rs78354379  | Hetero | Hetero |
| KDM6B    | 17p13.1  | nonsynonymous SNV   | NM_001080424:c.C1532A:p.P511H     | rs61031471  | Hetero | Hetero |
| TMEM88   | 17p13.1  | nonsynonymous SNV   | NM_203411:c.C130T:p.L44F          | rs2270518   | Hetero | Hetero |
| MYH13    | 17p13.1  | nonsynonymous SNV   | NM_003802:c.G3881A:p.R1294Q       | rs17690195  | Hetero | Hetero |
| MYH3     | 17p13.1  | nonsynonymous SNV   | NM_002470:c.G3574A:p.A1192T       | rs2285477   | Hetero | Hetero |
| DNAH9    | 17p12    | nonsynonymous SNV   | NM_001372:c.G6485A:p.R2162K       | rs61743635  | Hetero | Hetero |
| ELAC2    | 17p12    | nonsynonymous SNV   | NM_018127:c.C650T:p.S217L         | rs4792311   | Hetero | Hetero |
| COX10    | 17p12    | nonsynonymous SNV   | NM_001303:c.G476A:p.R159Q         | rs8077302   | Hetero | Hetero |
| TEKT3    | 17p12    | nonsynonymous SNV   | NM_031898:c.G8A:p.R3H             | rs7226363   | Hetero | Hetero |

|           |          |                        |                                       |             |        |        |
|-----------|----------|------------------------|---------------------------------------|-------------|--------|--------|
| CDRT1     | 17p12    | nonsynonymous SNV      | NM_006382:c.T1927C:p.F643L            | rs8078150   | Hetero | Hetero |
| TRIM16    | 17p12    | nonsynonymous SNV      | NM_006470:c.G363T:p.E121D             | rs2074890   | Hetero | Hetero |
| ATPAF2    | 17p11.2  | stoploss SNV           | NM_145691:c.T868C:p.X290R             |             | Hetero | Hetero |
| KIAA0100  | 17q11.2  | nonsynonymous SNV      | NM_014680:c.T4547G:p.V1516G           | rs12602520  | Hetero | Hetero |
| ATAD5     | 17q11.2  | nonsynonymous SNV      | NM_024857:c.A103T:p.T35S              | rs9910051   | Hetero | Hetero |
| ATAD5     | 17q11.2  | nonsynonymous SNV      | NM_024857:c.C259T:p.P87S              | rs3816780   | Hetero | Hetero |
| ATAD5     | 17q11.2  | nonsynonymous SNV      | NM_024857:c.G746A:p.R249K             | rs17826219  | Hetero | Hetero |
| ATAD5     | 17q11.2  | nonframeshift deletion | NM_024857:c.857_862del:p.286_288del   | rs72427574  | Hetero | Hetero |
| ATAD5     | 17q11.2  | nonsynonymous SNV      | NM_024857:c.A2095C:p.N699H            | rs3764421   | Hetero | Hetero |
| ATAD5     | 17q11.2  | nonsynonymous SNV      | NM_024857:c.T4255C:p.Y1419H           | rs11657270  | Hetero | Hetero |
| TEFM      | 17q11.2  | nonsynonymous SNV      | NM_024683:c.A1042G:p.I348V            | rs2433      | Hetero | Hetero |
| UNC45B    | 17q12    | nonsynonymous SNV      | NM_001033576:c.G2398C:p.G800R         | rs142387062 | Hetero | Hetero |
| SLFN12L   | 17q12    | nonsynonymous SNV      | NM_001195790:c.A1553C:p.Y518S         | rs3744372   | Hetero | Hetero |
| SLFN12L   | 17q12    | nonsynonymous SNV      | NM_001195790:c.C1118G:p.A373G         | rs2304967   | Hetero | Hetero |
| SLFN12L   | 17q12    | frameshift deletion    | NM_001195790:c.387delC:p.S129fs       | rs143471015 | Hetero | Hetero |
| PLXDC1    | 17q12    | nonsynonymous SNV      | NM_020405:c.G1385A:p.R462H            | rs75117355  | Hetero | Hetero |
| CACNB1    | 17q12    | nonsynonymous SNV      | NM_000723:c.C665G:p.P222R             |             | Hetero | Hetero |
| KRT25     | 17q21.2  | nonsynonymous SNV      | NM_181534:c.G197C:p.G66A              | rs35076248  | Hetero | Hetero |
| KRT26     | 17q21.2  | nonsynonymous SNV      | NM_181539:c.T352C:p.W118R             | rs9898164   | Hetero | Hetero |
| KRT27     | 17q21.2  | nonsynonymous SNV      | NM_181537:c.G430A:p.E144K             | rs12453124  | Hetero | Hetero |
| KRTAP9-3  | 17q21.2  | nonsynonymous SNV      | NM_031962:c.C58A:p.Q20K               | rs112082369 | Hetero | Hetero |
| KRTAP16-1 | 17q21.2  | nonsynonymous SNV      | NM_001146182:c.C1460G:p.A487G         | rs2074286   | Hetero | Hetero |
| KRTAP16-1 | 17q21.2  | nonsynonymous SNV      | NM_001146182:c.C1019G:p.P340R         | rs2074285   | Hetero | Hetero |
| KRTAP16-1 | 17q21.2  | nonsynonymous SNV      | NM_001146182:c.G770C:p.S257T          | rs2074284   | Hetero | Hetero |
| KRTAP16-1 | 17q21.2  | nonsynonymous SNV      | NM_001146182:c.G412A:p.V138I          | rs12453338  | Hetero | Hetero |
| KRTAP17-1 | 17q21.2  | nonframeshift deletion | NM_031964:c.I36_150del:p.46_50del     | rs146763178 | Hetero | Hetero |
| KRTAP17-1 | 17q21.2  | nonsynonymous SNV      | NM_031964:c.G125A:p.G42D              | rs78413710  | Hetero | Hetero |
| KRT33A    | 17q21.2  | nonsynonymous SNV      | NM_004138:c.C809T:p.A270V             | rs12937519  | Hetero | Hetero |
| KRT37     | 17q21.2  | nonsynonymous SNV      | NM_003770:c.C917A:p.A306D             | rs2071607   | Hetero | Hetero |
| KRT37     | 17q21.2  | stopgain SNV           | NM_003770:c.C703T:p.Q235X             | rs78158550  | Hetero | Hetero |
| KRT37     | 17q21.2  | nonsynonymous SNV      | NM_003770:c.C650T:p.A217V             | rs16966811  | Hetero | Hetero |
| KRT37     | 17q21.2  | nonsynonymous SNV      | NM_003770:c.A217T:p.S73C              | rs9916475   | Hetero | Hetero |
| KRT37     | 17q21.2  | nonsynonymous SNV      | NM_003770:c.A214G:p.T72A              | rs9916484   | Hetero | Hetero |
| KRT37     | 17q21.2  | nonsynonymous SNV      | NM_003770:c.A116G:p.N39S              | rs9916724   | Hetero | Hetero |
| DHX58     | 17q21.2  | nonsynonymous SNV      | NM_024119:c.G1568A:p.R523Q            | rs2074160   | Hetero | Hetero |
| DHX58     | 17q21.2  | nonsynonymous SNV      | NM_024119:c.A1274G:p.Q425R            | rs2074158   | Hetero | Hetero |
| DHX58     | 17q21.2  | nonsynonymous SNV      | NM_024119:c.T1211C:p.I404T            |             | Hetero | Hetero |
| HSPB9     | 17q21.2  | nonsynonymous SNV      | NM_033194:c.A5C:p.Q2P                 | rs1122326   | Hetero | Hetero |
| BRCA1     | 17q21.31 | nonsynonymous SNV      | NM_007297:c.A4696G:p.S1566G           | rs1799966   | Hetero | Hetero |
| BRCA1     | 17q21.31 | nonsynonymous SNV      | NM_007297:c.A3407G:p.K1136R           | rs16942     | Hetero | Hetero |
| BRCA1     | 17q21.31 | nonsynonymous SNV      | NM_007297:c.A2972G:p.E991G            | rs16941     | Hetero | Hetero |
| BRCA1     | 17q21.31 | nonsynonymous SNV      | NM_007297:c.C2471T:p.P824L            | rs799917    | Hetero | Hetero |
| NBR1      | 17q21.31 | nonsynonymous SNV      | NM_005899:c.A2768G:p.H923R            | rs8482      | Hetero | Hetero |
| FAM171A2  | 17q21.31 | nonsynonymous SNV      | NM_198475:c.C386T:p.P129L             | rs71371993  | Hetero | Hetero |
| OR4D2     | 17q22    | nonsynonymous SNV      | NM_001004707:c.C61T:p.R21W            | rs116853619 | Hetero | Hetero |
| OR4D2     | 17q22    | nonsynonymous SNV      | NM_001004707:c.C85A:p.L29I            | rs60994383  | Hetero | Hetero |
| ACE       | 17q23.3  | nonsynonymous SNV      | NM_000789:c.A928G:p.S310G             | rs144137849 | Hetero | Hetero |
| KCNH6     | 17q23.3  | nonsynonymous SNV      | NM_030779:c.C2774T:p.T925M            | rs35819807  | Hetero | Hetero |
| FTSJ3     | 17q23.3  | nonsynonymous SNV      | NM_017647:c.A1270T:p.S424C            | rs2727288   | Hetero | Hetero |
| FTSJ3     | 17q23.3  | nonsynonymous SNV      | NM_017647:c.C271G:p.Q91E              | rs2584625   | Hetero | Hetero |
| KPNA2     | 17q24.2  | nonsynonymous SNV      | NM_002266:c.G1567A:p.A523T            | rs141790032 | Hetero | Hetero |
| SLC39A11  | 17q24.3  | nonsynonymous SNV      | NM_001159770:c.C860T:p.A287V          | rs61736066  | Hetero | Hetero |
| LILRA1    | 19q13.42 | nonsynonymous SNV      | NM_006863:c.A34G:p.R12G               | rs1974982   | Hetero | Hetero |
| SIRPB1    | 20p13    | nonsynonymous SNV      | NM_001083910:c.A67G:p.R23G            | rs1535882   | Hetero | Hetero |
| TGM6      | 20p13    | nonsynonymous SNV      | NM_001254734:c.G1103A:p.R368Q         | rs75122556  | Hetero | Hetero |
| TMC2      | 20p13    | nonframeshift deletion | NM_080751:c.2545_2547del:p.849_849del | rs142900000 | Hetero | Hetero |
| NOP56     | 20p13    | nonsynonymous SNV      | NM_006392:c.A361G:p.I121V             | rs2273137   | Hetero | Hetero |
| NOP56     | 20p13    | nonsynonymous SNV      | NM_006392:c.T1727C:p.V576A            | rs5856      | Hetero | Hetero |
| TAF4      | 20q13.33 | nonframeshift deletion | NM_003185:c.556_561del:p.186_187del   |             | Homo   | Homo   |
| ZNF70     | 22q11.23 | nonsynonymous SNV      | NM_021916:c.A143G:p.Y48C              | rs145952310 | Hetero | Hetero |
| SLC2A11   | 22q11.23 | nonsynonymous SNV      | NM_001024938:c.G695A:p.R232Q          | rs9608213   | Hetero | Hetero |
| CABIN1    | 22q11.23 | nonsynonymous SNV      | NM_001201429:c.C5837T:p.P1946L        | rs146769197 | Hetero | Hetero |
| ADORA2A   | 22q11.23 | nonsynonymous SNV      | NM_000675:c.G823A:p.V275I             | rs141942830 | Hetero | Hetero |
| KREMEN1   | 22q12.1  | nonsynonymous SNV      | NM_001039570:c.G471T:p.R157S          | rs61751700  | Hetero | Hetero |
| GATSL3    | 22q12.2  | nonsynonymous SNV      | NM_001037666:c.C964T:p.R322W          |             | Hetero | Hetero |
| SFII      | 22q12.2  | nonsynonymous SNV      | NM_014775:c.T1349C:p.F450S            |             | Hetero | Hetero |
| PRR14L    | 22q12.2  | nonsynonymous SNV      | NM_173566:c.C3662T:p.S1221L           | rs140078    | Hetero | Hetero |
| PRR14L    | 22q12.2  | nonsynonymous SNV      | NM_173566:c.A1364G:p.N455S            | rs140081    | Hetero | Hetero |
| TMPRSS6   | 22q12.3  | nonsynonymous SNV      | NM_153609:c.T2207C:p.V736A            | rs855791    | Hetero | Hetero |
| CARD10    | 22q13.1  | nonframeshift deletion | NM_014550:c.814_819del:p.272_273del   | rs113275238 | Hetero | Hetero |
| APOBEC3B  | 22q13.1  | nonsynonymous SNV      | NM_004900:c.A184G:p.K62E              | rs2076109   | Hetero | Hetero |

|              |          |                   |                               |             |        |        |
|--------------|----------|-------------------|-------------------------------|-------------|--------|--------|
| TAB1         | 22q13.1  | nonsynonymous SNV | NM_006116:c.T455C:p.L152P     | rs35469986  | Hetero | Hetero |
| TCF20        | 22q13.2  | nonsynonymous SNV | NM_005650:c.A2164G:p.S722G    | rs5758651   | Hetero | Hetero |
| PNPLA5       | 22q13.31 | nonsynonymous SNV | NM_138814:c.C418T:p.L140F     | rs2071883   | Hetero | Hetero |
| PRR5         | 22q13.31 | nonsynonymous SNV | NM_001017529:c.G442A:p.V148M  | rs36082900  | Hetero | Hetero |
| ARSD         | Xp22.33  | nonsynonymous SNV | NM_001669:c.C671G:p.S224C     | rs211653    | Hetero | Hetero |
| HDHD1        | Xp22.31  | nonsynonymous SNV | NM_001178135:c.C493G:p.P165A  | rs3747386   | Hetero | Hetero |
| KAL1         | Xp22.31  | nonsynonymous SNV | NM_000216:c.G1600A:p.V534I    | rs808119    | Hetero | Hetero |
| SHROOM2      | Xp22.2   | nonsynonymous SNV | NM_001649:c.A4423G:p.I1475V   | rs12012202  | Hetero | Hetero |
| TCEANC       | Xp22.2   | nonsynonymous SNV | NM_152634:c.C578T:p.S193L     | rs2361159   | Hetero | Hetero |
| TCEANC       | Xp22.2   | nonsynonymous SNV | NM_152634:c.G1142T:p.W381L    | rs5935650   | Hetero | Hetero |
| NHS          | Xp22.13  | nonsynonymous SNV | NM_198270:c.T3955C:p.F1319L   | rs3747295   | Hetero | Hetero |
| CXorf36      | Xp11.3   | nonsynonymous SNV | NM_024689:c.G383A:p.R128K     | rs1132201   | Hetero | Hetero |
| LOC100509575 | Xp11.2   | nonsynonymous SNV | NM_001205103:c.A329C:p.K110T  |             | Hetero | Hetero |
| NHSL2        | Xq13.1   | nonsynonymous SNV | NM_001013627:c.G586A:p.E196K  | rs72630038  | Hetero | Hetero |
| ATRX         | Xq21.1   | nonsynonymous SNV | NM_138270:c.C2671G:p.Q891E    | rs3088074   | Hetero | Hetero |
| ATP7A        | Xq21.1   | nonsynonymous SNV | NM_000052:c.G2299C:p.V767L    | rs2227291   | Hetero | Hetero |
| RPS6KA6      | Xq21.1   | nonsynonymous SNV | NM_014496:c.G2074A:p.D692N    | rs6616890   | Hetero | Hetero |
| TAF7L        | Xq22.1   | nonsynonymous SNV | NM_001168474:c.A664G:p.S222G  | rs35899692  | Hetero | Hetero |
| ZCCHC18      | Xq22.2   | nonsynonymous SNV | NM_001143978:c.A1160T:p.E387V | rs144116434 | Hetero | Hetero |
| ESX1         | Xq22.2   | nonsynonymous SNV | NM_153448:c.G874A:p.A292T     |             | Hetero | Hetero |
| KCNE1L       | Xq23     | nonsynonymous SNV | NM_012282:c.G87T:p.L29F       |             | Hetero | Hetero |
| ZCCHC16      | Xq23     | nonsynonymous SNV | NM_001004308:c.T80C:p.L27P    | rs6568050   | Hetero | Hetero |
| CXorf64      | Xq25     | nonsynonymous SNV | NM_001122716:c.T578C:p.M193T  | rs4289953   | Hetero | Hetero |
| FRMD7        | Xq26.2   | nonsynonymous SNV | NM_194277:c.A1481G:p.Q494R    |             | Hetero | Hetero |
| GPR112       | Xq26.3   | nonsynonymous SNV | NM_153834:c.A828G:p.I276M     | rs4829829   | Hetero | Hetero |
| GPR112       | Xq26.3   | nonsynonymous SNV | NM_153834:c.C1103A:p.P368H    | rs5930931   | Hetero | Hetero |
| GPR112       | Xq26.3   | nonsynonymous SNV | NM_153834:c.T5371C:p.F1791L   | rs5930932   | Hetero | Hetero |
| F9           | Xq27.1   | nonsynonymous SNV | NM_000133:c.G769A:p.V257I     |             | Hetero | Hetero |
| CXorf66      | Xq27.1   | nonsynonymous SNV | NM_001013403:c.C698T:p.P233L  | rs5955139   | Hetero | Hetero |
| MAGEC1       | Xq27.2   | nonsynonymous SNV | NM_005462:c.A1090G:p.T364A    | rs4824884   | Hetero | Hetero |
| IDS          | Xq28     | nonsynonymous SNV | NM_000202:c.A97T:p.T33S       |             | Hetero | Hetero |
| GABRQ        | Xq28     | nonsynonymous SNV | NM_018558:c.T1432A:p.F478I    | rs3810651   | Hetero | Hetero |
| IRAK1        | Xq28     | nonsynonymous SNV | NM_001025243:c.C1358T:p.S453L | rs1059703   | Hetero | Hetero |
| IRAK1        | Xq28     | nonsynonymous SNV | NM_001025242:c.T587C:p.F196S  | rs1059702   | Hetero | Hetero |
| CTAG2        | Xq28     | nonsynonymous SNV | NM_020994:c.C265G:p.Q89E      | rs17328091  | Hetero | Hetero |
| F8           | Xq28     | nonsynonymous SNV | NM_000132:c.C3780G:p.D1260E   | rs1800291   | Hetero | Hetero |

<Synonymous variants>

|          |         |                |                                |             |        |        |
|----------|---------|----------------|--------------------------------|-------------|--------|--------|
| BATF3    | 1q32.3  | synonymous SNV | NM_018664:c.A9G:p.Q3Q          | rs2202682   | Hetero | Homo   |
| GRM7     | 3p26.1  | synonymous SNV | NM_000844:c.T2196C:p.Y732Y     | rs1485175   | Hetero | Hetero |
| SLC6A11  | 3p25.3  | synonymous SNV | NM_014229:c.A1737G:p.T579T     | rs2245532   | Hetero | Hetero |
| BTD      | 3p25.1  | synonymous SNV | NM_000060:c.C1101T:p.G367G     | rs142421934 | Hetero | Hetero |
| ANKRD28  | 3p25.1  | synonymous SNV | NM_001195099:c.C1059T:p.N353N  | rs2470548   | Hetero | Hetero |
| ANKRD28  | 3p25.1  | synonymous SNV | NM_001195099:c.A1050G:p.Q350Q  | rs2470549   | Hetero | Hetero |
| PLCL2    | 3p24.3  | synonymous SNV | NM_015184:c.C234A:p.R78R       | rs28932173  | Hetero | Hetero |
| RBMS3    | 3p24.1  | synonymous SNV | NM_001003792:c.C339T:p.A113A   | rs3773104   | Hetero | Hetero |
| OSBPL10  | 3p23    | synonymous SNV | NM_001174060:c.G1980A:p.L660L  | rs2305610   | Hetero | Hetero |
| CRTP     | 3p22.3  | synonymous SNV | NM_006371:c.G213A:p.L71L       | rs11558338  | Hetero | Hetero |
| CRL2     | 3p21.31 | synonymous SNV | NM_001130910:c.A444C:p.G148G   | rs11266744  | Hetero | Hetero |
| WDR6     | 3p21.31 | synonymous SNV | NM_018031:c.T924C:p.C308C      | rs149007635 | Hetero | Hetero |
| ALAS1    | 3p21.2  | synonymous SNV | NM_199166:c.C519T:p.I173I      | rs352168    | Hetero | Hetero |
| TLR9     | 3p21.2  | synonymous SNV | NM_017442:c.G1635A:p.P545P     | rs352140    | Hetero | Hetero |
| DNAH1    | 3p21.1  | synonymous SNV | NM_015512:c.G6819A:p.L2273L    | rs79760452  | Hetero | Hetero |
| DNAH1    | 3p21.1  | synonymous SNV | NM_015512:c.C6957T:p.H2319H    | rs1546737   | Hetero | Hetero |
| CHDH     | 3p21.1  | synonymous SNV | NM_018397:c.G720A:p.A240A      | rs2241808   | Hetero | Hetero |
| IL17RB   | 3p21.1  | synonymous SNV | NM_018725:c.C126G:p.P42P       | rs1025689   | Hetero | Hetero |
| CACNA2D3 | 3p14.3  | synonymous SNV | NM_018398:c.G1260A:p.Q420Q     | rs3732748   | Hetero | Hetero |
| ATXN7    | 3p14.1  | synonymous SNV | NM_001128149:c.C1702T:p.L568L  | rs3733125   | Hetero | Hetero |
| ALCAM    | 3q13.11 | synonymous SNV | NM_001243280:c.T1281C:p.S427S  | rs16851279  | Hetero | Hetero |
| SLC9A10  | 3q13.2  | synonymous SNV | NM_183061:c.T2910C:p.T970T     | rs74367861  | Hetero | Hetero |
| HPS3     | 3q24    | synonymous SNV | NM_032383:c.C2526T:p.H842H     | rs3732557   | Hetero | Homo   |
| TTC14    | 3q26.33 | synonymous SNV | NM_133462:c.A2094G:p.R698R     |             | Hetero | Hetero |
| HTR3D    | 3q27.1  | synonymous SNV | NM_001145143:c.C417T:p.T139T   | rs56365132  | Hetero | Hetero |
| HTR3D    | 3q27.1  | synonymous SNV | NM_182537:c.C714T:p.A238A      | rs56203055  | Hetero | Hetero |
| UGT2B28  | 4q13.2  | synonymous SNV | NM_053039:c.A1173G:p.V391V     | rs10013145  | Hetero | Hetero |
| DSPP     | 4q22.1  | synonymous SNV | NM_014208:c.C3300T:p.S1100S    |             | Hetero | Hetero |
| SQSTM1   | 5q35.3  | synonymous SNV | NM_003900:c.G150C:p.R50R       |             | Hetero | Hetero |
| FLT4     | 5q35.3  | synonymous SNV | NM_002020:c.G2196A:p.K732K     | rs147242761 | Hetero | Hetero |
| SGK223   | 8p23.1  | synonymous SNV | NM_001080826:c.G3498C:p.P1166P |             | Hetero | Hetero |
| TNKS     | 8p23.1  | synonymous SNV | NM_003747:c.G1434A:p.P478P     | rs33944167  | Hetero | Hetero |
| TNKS     | 8p23.1  | synonymous SNV | NM_003747:c.C1719A:p.V573V     | rs35052906  | Hetero | Hetero |
| RPIL1    | 8p23.1  | synonymous SNV | NM_178857:c.A4044G:p.G1348G    | rs13253055  | Hetero | Hetero |

|              |          |                |                               |             |        |        |
|--------------|----------|----------------|-------------------------------|-------------|--------|--------|
| MSR1         | 8p22     | synonymous SNV | NM_138715:c.A1038G:p.P346P    | rs34175190  | Hetero | Hetero |
| MTUS1        | 8p22     | synonymous SNV | NM_020749:c.A714G:p.E238E     |             | Hetero | Hetero |
| PCM1         | 8p22     | synonymous SNV | NM_006197:c.A2568T:p.L856L    | rs6991775   | Hetero | Hetero |
| PSD3         | 8p22     | synonymous SNV | NM_206909:c.G42A:p.G14G       | rs35222739  | Hetero | Hetero |
| PSD3         | 8p22     | synonymous SNV | NM_015310:c.A915G:p.E305E     | rs13273954  | Hetero | Hetero |
| SLC18A1      | 8p21.3   | synonymous SNV | NM_001142324:c.C969T:p.L323L  | rs2270648   | Hetero | Hetero |
| GFRA2        | 8p21.3   | synonymous SNV | NM_001165039:c.G390C:p.L130L  | rs80120686  | Hetero | Hetero |
| DOK2         | 8p21.3   | synonymous SNV | NM_003974:c.C1161T:p.A387A    | rs17853066  | Hetero | Hetero |
| XPO7         | 8p21.3   | synonymous SNV | NM_015024:c.C696T:p.I232I     | rs2306641   | Hetero | Hetero |
| SLC39A14     | 8p21.3   | synonymous SNV | NM_001128431:c.C156T:p.G52G   | rs33999442  | Hetero | Hetero |
| SLC39A14     | 8p21.3   | synonymous SNV | NM_001128431:c.T1041C:p.H347H | rs6558052   | Hetero | Hetero |
| PDLIM2       | 8p21.3   | synonymous SNV | NM_176871:c.A447G:p.A149A     | rs2294047   | Hetero | Hetero |
| C8orf58      | 8p21.3   | synonymous SNV | NM_001013842:c.C526T:p.L176L  | rs57261277  | Hetero | Hetero |
| ENTPD4       | 8p21.3   | synonymous SNV | NM_001128930:c.C1756A:p.R586R |             | Hetero | Hetero |
| DOCK5        | 8p21.2   | synonymous SNV | NM_024940:c.C3618T:p.D1206D   | rs2271108   | Hetero | Hetero |
| ADAM32       | 8p11.22  | synonymous SNV | NM_145004:c.T1743C:p.T581T    | rs4515515   | Hetero | Hetero |
| KAT6A        | 8p11.21  | synonymous SNV | NM_006766:c.C4455T:p.S1485S   | rs3739365   | Hetero | Hetero |
| KAT6A        | 8p11.21  | synonymous SNV | NM_006766:c.G2982A:p.P994P    | rs3824275   | Hetero | Hetero |
| DKK4         | 8p11.21  | synonymous SNV | NM_014420:c.C507T:p.V169V     | rs2073664   | Hetero | Hetero |
| OPRK1        | 8q11.23  | synonymous SNV | NM_000912:c.G36T:p.P12P       | rs1051660   | Hetero | Hetero |
| UBXN2B       | 8q12.1   | synonymous SNV | NM_001077619:c.A144G:p.R48R   | rs138120094 | Hetero | Hetero |
| NKAIN3       | 8q12.3   | synonymous SNV | NM_173688:c.G393A:p.T131T     | rs1319275   | Hetero | Hetero |
| C8orf46      | 8q13.1   | synonymous SNV | NM_152765:c.C531T:p.C177C     | rs16932952  | Hetero | Hetero |
| PREX2        | 8q13.2   | synonymous SNV | NM_024870:c.A4797G:p.P1599P   | rs2280637   | Hetero | Hetero |
| XKR9         | 8q13.3   | synonymous SNV | NM_001011720:c.G132A:p.A44A   | rs6991329   | Hetero | Hetero |
| ZFHX4        | 8q21.11  | synonymous SNV | NM_024721:c.C9036T:p.C3012C   | rs139869161 | Hetero | Hetero |
| RBM12B       | 8q22.1   | synonymous SNV | NM_203390:c.C1941A:p.P647P    | rs3133974   | Hetero | Hetero |
| TMEM67       | 8q22.1   | synonymous SNV | NM_153704:c.A2892C:p.T964T    | rs16916221  | Hetero | Hetero |
| CDH17        | 8q22.1   | synonymous SNV | NM_001144663:c.G1941A:p.L647L | rs1131830   | Hetero | Hetero |
| ESRP1        | 8q22.1   | synonymous SNV | NM_001034915:c.C984T:p.V328V  | rs1549466   | Hetero | Hetero |
| ESRP1        | 8q22.1   | synonymous SNV | NM_001034915:c.T1788C:p.N596N | rs12677519  | Hetero | Hetero |
| VPS13B       | 8q22.2   | synonymous SNV | NM_017890:c.T9567C:p.S3189S   | rs36074608  | Hetero | Hetero |
| FBXO32       | 8q24.13  | synonymous SNV | NM_148177:c.G171A:p.T57T      | rs3739287   | Hetero | Hetero |
| FER1L6       | 8q24.13  | synonymous SNV | NM_001039112:c.T615C:p.S205S  | rs7465584   | Hetero | Hetero |
| HHLA1        | 8q24.22  | synonymous SNV | NM_001145095:c.G1170A:p.L390L |             | Hetero | Hetero |
| TUSC1        | 9p21.2   | synonymous SNV | NM_001004125:c.A387G:p.A129A  | rs35110225  | Hetero | Hetero |
| LOC100506422 | 9p21.2   | synonymous SNV | NM_001004352:c.G333A:p.R111R  | rs12376729  | Hetero | Hetero |
| TEK          | 9p21.2   | synonymous SNV | NM_000459:c.C3151T:p.L1051L   | rs2273718   | Hetero | Hetero |
| B4GALT1      | 9p21.1   | synonymous SNV | NM_001497:c.C597T:p.H199H     | rs1065765   | Hetero | Hetero |
| FAM205A      | 9p13.3   | synonymous SNV | NM_001141917:c.A819G:p.P273P  | rs2937382   | Hetero | Hetero |
| FAM214B      | 9p13.3   | synonymous SNV | NM_025182:c.C1578T:p.T526T    | rs7030595   | Hetero | Hetero |
| TESK1        | 9p13.3   | synonymous SNV | NM_006285:c.G441A:p.L147L     | rs2275422   | Hetero | Hetero |
| PIP5K1B      | 9q21.11  | synonymous SNV | NM_003558:c.G1320A:p.L440L    | rs117957752 | Hetero | Hetero |
| CEP78        | 9q21.2   | synonymous SNV | NM_001098802:c.G84C:p.S28S    | rs10867166  | Hetero | Hetero |
| PSAT1        | 9q21.2   | synonymous SNV | NM_021154:c.T297G:p.A99A      | rs3739474   | Hetero | Hetero |
| OR13C9       | 9q31.1   | synonymous SNV | NM_001001956:c.A90C:p.L30L    | rs36091517  | Homo   | Hetero |
| LHX3         | 9q34.3   | synonymous SNV | NM_014564:c.G81A:p.A27A       | rs2274116   | Hetero | Hetero |
| QSOX2        | 9q34.3   | synonymous SNV | NM_181701:c.A1866G:p.P622P    | rs9696116   | Hetero | Hetero |
| QSOX2        | 9q34.3   | synonymous SNV | NM_181701:c.G957A:p.K319K     | rs12684650  | Hetero | Hetero |
| DPP7         | 9q34.3   | synonymous SNV | NM_013379:c.T162C:p.P54P      | rs11145999  | Hetero | Hetero |
| RNF224       | 9q34.3   | synonymous SNV | NM_001190228:c.C468G:p.V156V  | rs80009402  | Hetero | Hetero |
| SLC34A3      | 9q34.3   | synonymous SNV | NM_001177316:c.G942C:p.A314A  | rs34664302  | Hetero | Hetero |
| FAM166A      | 9q34.3   | synonymous SNV | NM_001001710:c.T657C:p.Y219Y  | rs4073074   | Hetero | Hetero |
| ANKRD16      | 10p15.1  | synonymous SNV | NM_001009941:c.A585G:p.Q195Q  | rs3750656   | Hetero | Hetero |
| FBXO18       | 10p15.1  | synonymous SNV | NM_178150:c.G2853A:p.L951L    | rs117214741 | Hetero | Hetero |
| FBXO18       | 10p15.1  | synonymous SNV | NM_178150:c.T3006C:p.C1002C   | rs2274033   | Hetero | Hetero |
| GLB1L2       | 11q25    | synonymous SNV | NM_138342:c.C1680G:p.T560T    | rs3741097   | Hetero | Hetero |
| NOC4L        | 12q24.33 | synonymous SNV | NM_024078:c.C957T:p.H319H     | rs77081180  | Hetero | Hetero |
| PXMP2        | 12q24.33 | synonymous SNV | NM_018663:c.C76T:p.L26L       | rs11538534  | Hetero | Hetero |
| TUBA3C       | 13q12.11 | synonymous SNV | NM_006001:c.A894G:p.P298P     | rs36216108  | Hetero | Hetero |
| TUBA3C       | 13q12.11 | synonymous SNV | NM_006001:c.C466A:p.R156R     | rs9507566   | Hetero | Hetero |
| AHNAK2       | 14q32.33 | synonymous SNV | NM_138420:c.C6930T:p.D2310D   |             | Hetero | Hetero |
| TUBGCP5      | 15q11.2  | synonymous SNV | NM_001102610:c.G345T:p.L115L  | rs61744212  | Hetero | Hetero |
| DCTN5        | 16p12.2  | synonymous SNV | NM_001199743:c.A408G:p.P136P  | rs35586     | Hetero | Hetero |
| RBBP6        | 16p12.1  | synonymous SNV | NM_018703:c.A4917G:p.A1639A   | rs7593      | Hetero | Hetero |
| ZKSCAN2      | 16p12.1  | synonymous SNV | NM_001012981:c.G1581A:p.K527K | rs11642611  | Hetero | Hetero |
| ZKSCAN2      | 16p12.1  | synonymous SNV | NM_001012981:c.T1482C:p.N494N | rs11649280  | Hetero | Hetero |
| SH2B1        | 16p11.2  | synonymous SNV | NM_001145795:c.C2238G:p.P746P | rs148378470 | Hetero | Hetero |
| TBC1D10B     | 16p11.2  | synonymous SNV | NM_015527:c.A1104G:p.K368K    | rs8049108   | Hetero | Hetero |
| ZNF768       | 16p11.2  | synonymous SNV | NM_024671:c.T789C:p.C263C     | rs3751847   | Hetero | Hetero |
| SHCBP1       | 16q11.2  | synonymous SNV | NM_024745:c.C612T:p.N204N     | rs34559393  | Hetero | Hetero |

|              |          |                |                                |             |        |        |
|--------------|----------|----------------|--------------------------------|-------------|--------|--------|
| ABCC11       | 16q12.1  | synonymous SNV | NM_033151:c.G3531A:p.T1177T    | rs74869498  | Hetero | Hetero |
| CHD9         | 16q12.2  | synonymous SNV | NM_025134:c.G3849A:p.Q1283Q    | rs8052283   | Hetero | Hetero |
| CHD9         | 16q12.2  | synonymous SNV | NM_025134:c.G5406A:p.Q1802Q    | rs2287078   | Hetero | Hetero |
| CES5A        | 16q12.2  | synonymous SNV | NM_145024:c.C1407G:p.L469L     | rs11860488  | Hetero | Hetero |
| CMTM1        | 16q21    | synonymous SNV | NM_052999:c.G63A:p.P21P        | rs7193473   | Hetero | Hetero |
| CMTM3        | 16q21    | synonymous SNV | NM_181553:c.G96A:p.P32P        | rs3743718   | Hetero | Hetero |
| CES3         | 16q22.1  | synonymous SNV | NM_001185176:c.G519A:p.R173R   | rs3848289   | Hetero | Hetero |
| CDH1         | 16q22.1  | synonymous SNV | NM_004360:c.C2253T:p.N751N     | rs33964119  | Hetero | Hetero |
| VPS4A        | 16q22.1  | synonymous SNV | NM_013245:c.G606A:p.L202L      |             | Hetero | Hetero |
| DHX38        | 16q22.2  | synonymous SNV | NM_014003:c.T69C:p.G23G        | rs11554764  | Hetero | Hetero |
| SPATA22      | 17p13.2  | synonymous SNV | NM_001170696:c.G870A:p.P290P   | rs9901726   | Hetero | Hetero |
| TRPV1        | 17p13.2  | synonymous SNV | NM_080706:c.G2157A:p.K719K     | rs877610    | Hetero | Hetero |
| TRPV1        | 17p13.2  | synonymous SNV | NM_080706:c.C2040T:p.I680I     | rs17706245  | Hetero | Hetero |
| TRPV1        | 17p13.2  | synonymous SNV | NM_080706:c.T1695C:p.Y565Y     | rs34378673  | Hetero | Hetero |
| ATP2A3       | 17p13.2  | synonymous SNV | NM_174955:c.A3102G:p.R1034R    | rs887387    | Hetero | Hetero |
| ANKFY1       | 17p13.2  | synonymous SNV | NM_016376:c.G2184A:p.T728T     | rs117382496 | Hetero | Hetero |
| SPNS3        | 17p13.2  | synonymous SNV | NM_182538:c.C150G:p.V50V       | rs3809853   | Hetero | Hetero |
| GGT6         | 17p13.2  | synonymous SNV | NM_001122890:c.C21T:p.P7P      | rs7216474   | Hetero | Hetero |
| TM4SF5       | 17p13.2  | synonymous SNV | NM_003963:c.G189A:p.P63P       | rs17765153  | Hetero | Hetero |
| GP1BA        | 17p13.2  | synonymous SNV | NM_000173:c.A1311G:p.P437P     | rs2586529   | Hetero | Hetero |
| GP1BA        | 17p13.2  | synonymous SNV | NM_000173:c.C1344T:p.T448T     | rs41466145  | Hetero | Hetero |
| FBXO39       | 17p13.1  | synonymous SNV | NM_153230:c.C1086T:p.I362I     | rs17853331  | Hetero | Hetero |
| ASGR1        | 17p13.1  | synonymous SNV | NM_001197216:c.G150A:p.K50K    | rs55714927  | Hetero | Hetero |
| SPEM1        | 17p13.1  | synonymous SNV | NM_199339:c.C858G:p.P286P      | rs34333422  | Hetero | Hetero |
| KDM6B        | 17p13.1  | synonymous SNV | NM_001080424:c.C3795A:p.I1265I | rs3736306   | Hetero | Hetero |
| CHD3         | 17p13.1  | synonymous SNV | NM_001005271:c.T3639C:p.F1213F | rs74903197  | Hetero | Hetero |
| MYH3         | 17p13.1  | synonymous SNV | NM_002470:c.C4731T:p.I1577I    | rs2285479   | Hetero | Hetero |
| MYH3         | 17p13.1  | synonymous SNV | NM_002470:c.A3138C:p.R1046R    | rs2285475   | Hetero | Hetero |
| MYH3         | 17p13.1  | synonymous SNV | NM_002470:c.T2952C:p.S984S     | rs2285474   | Hetero | Hetero |
| MYH3         | 17p13.1  | synonymous SNV | NM_002470:c.A2916G:p.T972T     | rs2285472   | Hetero | Hetero |
| MYH3         | 17p13.1  | synonymous SNV | NM_002470:c.A2532G:p.A844A     | rs2285469   | Hetero | Hetero |
| MYH3         | 17p13.1  | synonymous SNV | NM_002470:c.C2151A:p.G717G     | rs876657    | Hetero | Hetero |
| DNAH9        | 17p12    | synonymous SNV | NM_001372:c.C9744G:p.P3248P    | rs12449553  | Hetero | Hetero |
| DNAH9        | 17p12    | synonymous SNV | NM_001372:c.C10320T:p.N3440N   | rs61743933  | Hetero | Hetero |
| ELAC2        | 17p12    | synonymous SNV | NM_001165962:c.A1440G:p.T480T  | rs11545302  | Hetero | Hetero |
| USP22        | 17p11.2  | synonymous SNV | NM_015276:c.C1209A:p.I403I     | rs11541311  | Hetero | Hetero |
| USP22        | 17p11.2  | synonymous SNV | NM_015276:c.C321T:p.Y107Y      | rs2291037   | Hetero | Hetero |
| KIAA0100     | 17q11.2  | synonymous SNV | NM_014680:c.A5196G:p.E1732E    | rs141127714 | Hetero | Hetero |
| SUPT6H       | 17q11.2  | synonymous SNV | NM_003170:c.C2913T:p.V971V     | rs28753762  | Hetero | Hetero |
| SUPT6H       | 17q11.2  | synonymous SNV | NM_003170:c.C3000A:p.L1000L    | rs28588628  | Hetero | Hetero |
| TLCD1        | 17q11.2  | synonymous SNV | NM_001160407:c.G183A:p.T61T    | rs2288595   | Hetero | Hetero |
| NEK8         | 17q11.2  | synonymous SNV | NM_178170:c.T1170C:p.G390G     | rs3809797   | Hetero | Hetero |
| TRAF4        | 17q11.2  | synonymous SNV | NM_004295:c.C606T:p.F202F      | rs2070265   | Hetero | Hetero |
| C17orf63     | 17q11.2  | synonymous SNV | NM_001077498:c.T1413C:p.L471L  | rs2043031   | Hetero | Hetero |
| CRLF3        | 17q11.2  | synonymous SNV | NM_015986:c.T993C:p.D331D      | rs34756112  | Hetero | Hetero |
| ATAD5        | 17q11.2  | synonymous SNV | NM_024857:c.G39C:p.P13P        | rs999796    | Hetero | Hetero |
| ATAD5        | 17q11.2  | synonymous SNV | NM_024857:c.T1074C:p.P358P     | rs11655623  | Hetero | Hetero |
| ATAD5        | 17q11.2  | synonymous SNV | NM_024857:c.A3003G:p.V1001V    | rs9896095   | Hetero | Hetero |
| NF1          | 17q11.2  | synonymous SNV | NM_000267:c.C369G:p.T123T      | rs146691765 | Hetero | Hetero |
| RHOT1        | 17q11.2  | synonymous SNV | NM_001033566:c.A1458G:p.E486E  | rs16967164  | Hetero | Hetero |
| TMEM132E     | 17q12    | synonymous SNV | NM_207313:c.G180A:p.E60E       | rs4795954   | Hetero | Hetero |
| RAD51D       | 17q12    | synonymous SNV | NM_002878:c.C234T:p.S78S       | rs9901455   | Hetero | Hetero |
| LYZL6        | 17q12    | synonymous SNV | NM_020426:c.A198G:p.A66A       | rs1052266   | Hetero | Hetero |
| LHX1         | 17q12    | synonymous SNV | NM_005568:c.C816A:p.P272P      |             | Hetero | Hetero |
| ARHGAP23     | 17q12    | synonymous SNV | NM_001199417:c.C2481T:p.N827N  | rs7405920   | Homo   | Hetero |
| ARHGAP23     | 17q12    | synonymous SNV | NM_001199417:c.C4290T:p.P1430P | rs15537     | Hetero | Hetero |
| SRCIN1       | 17q12    | synonymous SNV | NM_025248:c.G3312A:p.P1104P    | rs35262222  | Hetero | Hetero |
| LASP1        | 17q12    | synonymous SNV | NM_006148:c.C687T:p.I229I      | rs3744075   | Hetero | Hetero |
| IKZF3        | 17q12    | synonymous SNV | NM_183231:c.C1029T:p.S343S     | rs907092    | Hetero | Hetero |
| ZBP2         | 17q12    | synonymous SNV | NM_199321:c.C90T:p.G30G        | rs75027016  | Hetero | Hetero |
| KRTAP16-1    | 17q21.2  | synonymous SNV | NM_001146182:c.A117T:p.T39T    | rs12451604  | Hetero | Hetero |
| RAB5C        | 17q21.2  | synonymous SNV | NM_004583:c.C429T:p.A143A      | rs2230326   | Hetero | Hetero |
| GHDC         | 17q21.2  | synonymous SNV | NM_001142622:c.G576A:p.A192A   | rs72820887  | Hetero | Hetero |
| VAT1         | 17q21.31 | synonymous SNV | NM_006373:c.T315G:p.P105P      | rs2070835   | Hetero | Hetero |
| BRCA1        | 17q21.31 | synonymous SNV | NM_007297:c.T4167C:p.S1389S    | rs1060915   | Hetero | Hetero |
| BRCA1        | 17q21.31 | synonymous SNV | NM_007297:c.T2170C:p.L724L     | rs16940     | Hetero | Hetero |
| BRCA1        | 17q21.31 | synonymous SNV | NM_007297:c.C1941T:p.S647S     | rs1799949   | Hetero | Hetero |
| HDAC5        | 17q21.31 | synonymous SNV | NM_001015053:c.T3106C:p.L1036L |             | Hetero | Hetero |
| ABI3         | 17q21.32 | synonymous SNV | NM_001135186:c.C633A:p.A211A   | rs76617033  | Hetero | Hetero |
| CA10         | 17q21.33 | synonymous SNV | NM_020178:c.C705T:p.Y235Y      | rs11870209  | Hetero | Hetero |
| LOC100506650 | 17q22    | synonymous SNV | NM_001243552:c.A30G:p.V10V     | rs12450084  | Hetero | Hetero |

|          |          |                |                                |             |        |        |
|----------|----------|----------------|--------------------------------|-------------|--------|--------|
| TBX4     | 17q23.2  | synonymous SNV | NM_018488:c.C1446T;p.V482V     | rs2270150   | Hetero | Hetero |
| KCNH6    | 17q23.3  | synonymous SNV | NM_030779:c.T852C;p.D284D      | rs7225568   | Hetero | Hetero |
| PSMC5    | 17q23.3  | synonymous SNV | NM_001199163:c.C631T;p.L211L   | rs41414452  | Hetero | Hetero |
| PSMC5    | 17q23.3  | synonymous SNV | NM_001199163:c.C816T;p.L272L   | rs13030     | Hetero | Hetero |
| C17orf72 | 17q23.3  | synonymous SNV | NM_001191029:c.A710G;p.X237X   | rs11079520  | Hetero | Hetero |
| ERN1     | 17q23.3  | synonymous SNV | NM_001433:c.A2802G;p.T934T     | rs196912    | Hetero | Hetero |
| AXIN2    | 17q24.1  | synonymous SNV | NM_004655:c.C2062T;p.L688L     | rs35415678  | Hetero | Hetero |
| SDK2     | 17q25.1  | synonymous SNV | NM_001144952:c.G4353A;p.S1451S | rs2270723   | Hetero | Hetero |
| ZNF676   | 19p12    | synonymous SNV | NM_001001411:c.T723C;p.T241T   | rs142355819 | Hetero | Hetero |
| TMC2     | 20p13    | synonymous SNV | NM_080751:c.T1767C;p.S589S     | rs6515646   | Hetero | Hetero |
| SLC2A11  | 22q11.23 | synonymous SNV | NM_001024938:c.C699A;p.L233L   | rs9612499   | Hetero | Hetero |
| PLA2G3   | 22q12.2  | synonymous SNV | NM_015715:c.C795T;p.Y265Y      | rs2074739   | Hetero | Hetero |
| TOM1     | 22q12.3  | synonymous SNV | NM_001135730:c.T1152G;p.G384G  | rs743810    | Hetero | Hetero |
| TOM1     | 22q12.3  | synonymous SNV | NM_001135730:c.G1266C;p.G422G  | rs2071745   | Hetero | Hetero |
| APOL3    | 22q12.3  | synonymous SNV | NM_145640:c.T957A;p.G319G      | rs132618    | Hetero | Hetero |
| TMPRSS6  | 22q12.3  | synonymous SNV | NM_153609:c.C2217T;p.Y739Y     | rs2235321   | Hetero | Hetero |
| TMPRSS6  | 22q12.3  | synonymous SNV | NM_153609:c.C1563T;p.D521D     | rs4820268   | Hetero | Hetero |
| CARD10   | 22q13.1  | synonymous SNV | NM_014550:c.T1551C;p.N517N     | rs3817803   | Hetero | Hetero |
| CARD10   | 22q13.1  | synonymous SNV | NM_014550:c.C1398T;p.S466S     | rs3817805   | Hetero | Hetero |
| EIF3L    | 22q13.1  | synonymous SNV | NM_001242923:c.C351G;p.A117A   | rs11551384  | Hetero | Hetero |
| RPL3     | 22q13.1  | synonymous SNV | NM_000967:c.C21T;p.S7S         | rs61737929  | Hetero | Hetero |
| EP300    | 22q13.2  | synonymous SNV | NM_001429:c.G3348A;p.Q1116Q    | rs20554     | Hetero | Hetero |
| TTLL1    | 22q13.2  | synonymous SNV | NM_012263:c.C711T;p.F237F      | rs2272869   | Hetero | Hetero |
| TTLL12   | 22q13.2  | synonymous SNV | NM_015140:c.C390T;p.H130H      | rs2071723   | Hetero | Hetero |
| MPPED1   | 22q13.2  | synonymous SNV | NM_001044370:c.C267T;p.Y89Y    | rs2413761   | Hetero | Hetero |
| MPPED1   | 22q13.2  | synonymous SNV | NM_001044370:c.C327T;p.Y109Y   | rs4331615   | Hetero | Hetero |
| CERK     | 22q13.31 | synonymous SNV | NM_022766:c.C1506T;p.D502D     | rs35318967  | Hetero | Hetero |
| SHROOM2  | Xp22.2   | synonymous SNV | NM_001649:c.A3756G;p.T1252T    | rs2073945   | Hetero | Hetero |
| TLR8     | Xp22.2   | synonymous SNV | NM_138636:c.C354T;p.D118D      | rs2159377   | Hetero | Hetero |
| TCEANC   | Xp22.2   | synonymous SNV | NM_152634:c.C1101T;p.N367N     | rs5935649   | Hetero | Hetero |
| ASB11    | Xp22.2   | synonymous SNV | NM_001012428:c.T51C;p.R17R     | rs5935944   | Hetero | Hetero |
| MBTPS2   | Xp22.12  | synonymous SNV | NM_015884:c.A222G;p.Q74Q       | rs3213451   | Hetero | Hetero |
| DDX53    | Xp22.11  | synonymous SNV | NM_182699:c.T1245C;p.R415R     | rs78316756  | Hetero | Hetero |
| DYNLT3   | Xp11.4   | synonymous SNV | NM_006520:c.C183T;p.A61A       | rs11771     | Hetero | Hetero |
| MAOA     | Xp11.3   | synonymous SNV | NM_000240:c.G891T;p.R297R      | rs6323      | Hetero | Hetero |
| MAOA     | Xp11.3   | synonymous SNV | NM_000240:c.T1410C;p.D470D     | rs1137070   | Hetero | Hetero |
| KDM6A    | Xp11.3   | synonymous SNV | NM_021140:c.G3111A;p.Q1037Q    | rs20539     | Hetero | Hetero |
| ZNF673   | Xp11.3   | synonymous SNV | NM_001129898:c.A370C;p.R124R   | rs144294150 | Hetero | Hetero |
| SLC9A7   | Xp11.23  | synonymous SNV | NM_032591:c.C1824T;p.Y608Y     | rs3208940   | Hetero | Hetero |
| USP11    | Xp11.23  | synonymous SNV | NM_004651:c.G1515A;p.P505P     | rs138367954 | Hetero | Hetero |
| GPR173   | Xp11.22  | synonymous SNV | NM_018969:c.C1062T;p.H354H     | rs11091720  | Hetero | Hetero |
| HUWE1    | Xp11.22  | synonymous SNV | NM_031407:c.A9360G;p.A3120A    | rs2281481   | Hetero | Hetero |
| MAGED2   | Xp11.21  | synonymous SNV | NM_014599:c.A252G;p.S84S       | rs1043031   | Hetero | Hetero |
| MAGED2   | Xp11.21  | synonymous SNV | NM_014599:c.A396G;p.T132T      | rs1043034   | Hetero | Hetero |
| MAGED2   | Xp11.21  | synonymous SNV | NM_014599:c.C624T;p.A208A      | rs1043044   | Hetero | Hetero |
| MAGED2   | Xp11.21  | synonymous SNV | NM_014599:c.C981T;p.S327S      | rs2071932   | Hetero | Hetero |
| ARMCX5   | Xq22.1   | synonymous SNV | NM_001168482:c.A1401G;p.R467R  | rs148274740 | Hetero | Hetero |
| ZCCHC16  | Xq23     | synonymous SNV | NM_001004308:c.T657C;p.H219H   | rs7053563   | Hetero | Hetero |
| LONRF3   | Xq24     | synonymous SNV | NM_024778:c.G1176T;p.G392G     | rs142579791 | Hetero | Hetero |
| LONRF3   | Xq24     | synonymous SNV | NM_024778:c.T1902C;p.Y634Y     | rs188327106 | Hetero | Hetero |
| CXorf64  | Xq25     | synonymous SNV | NM_001122716:c.C279T;p.Y93Y    | rs41309536  | Hetero | Hetero |
| OR13H1   | Xq26.2   | synonymous SNV | NM_001004486:c.C549G;p.L183L   | rs17316625  | Hetero | Hetero |
| ZNF449   | Xq26.3   | synonymous SNV | NM_152695:c.C471T;p.A157A      | rs2286479   | Hetero | Hetero |
| DDX26B   | Xq26.3   | synonymous SNV | NM_182540:c.C2157T;p.D719D     | rs2298302   | Hetero | Hetero |
| GPR112   | Xq26.3   | synonymous SNV | NM_153834:c.C5493T;p.P1831P    | rs5930933   | Hetero | Hetero |
| HTATSF1  | Xq26.3   | synonymous SNV | NM_014500:c.G1263A;p.A421A     | rs1058376   | Hetero | Hetero |
| SLITRK2  | Xq27.3   | synonymous SNV | NM_001144009:c.G309A;p.T103T   | rs3810704   | Hetero | Hetero |
| MAGEA12  | Xq28     | synonymous SNV | NM_005367:c.A174C;p.S58S       | rs1894358   | Hetero | Hetero |
| MAGEA1   | Xq28     | synonymous SNV | NM_004988:c.C813T;p.L271L      | rs2233045   | Hetero | Hetero |
| ZNF275   | Xq28     | synonymous SNV | NM_001080485:c.T39C;p.P13P     | rs3213466   | Hetero | Hetero |
| BGN;BGN  | Xq28     | synonymous SNV | NM_001711:c.C564T;p.L188I      | rs2070933   | Hetero | Hetero |
| ATP2B3   | Xq28     | synonymous SNV | NM_001001344:c.G2592C;p.V864V  | rs2269415   | Hetero | Hetero |
| PLXNB3   | Xq28     | synonymous SNV | NM_005393:c.G4911A;p.R1637R    | rs34966902  | Hetero | Hetero |
| IRAK1    | Xq28     | synonymous SNV | NM_001025242:c.C483T;p.V161V   | rs1059701   | Hetero | Hetero |
| FLNA     | Xq28     | synonymous SNV | NM_001456:c.T5826C;p.A1942A    | rs2070825   | Hetero | Hetero |
| CTAG2    | Xq28     | synonymous SNV | NM_020994:c.T345G;p.P115P      | rs4326559   | Hetero | Hetero |
